1 **Development of thalamus mediates paternal age effect**  
2 **on offspring reading: A preliminary investigation**

3 Zhichao Xia <sup>a, b, c</sup>, Cheng Wang <sup>a</sup>, Roeland Hancock <sup>d</sup>, Maaïke Vandermosten <sup>e</sup>,  
4 Fumiko Hoeft <sup>a, d, f, g, h †</sup>

5 <sup>a</sup> Department of Psychiatry and Weill Institute for Neurosciences, University of  
6 California, San Francisco, CA USA

7 <sup>b</sup> State Key Laboratory of Cognitive Neuroscience and Learning & IDG/McGovern  
8 Institute for Brain Research, Beijing Normal University, China

9 <sup>c</sup> School of Systems Science, Beijing Normal University, China

10 <sup>d</sup> Department of Psychological Sciences and Brain Imaging Research Center,  
11 University of Connecticut, Storrs, CT USA

12 <sup>e</sup> Experimental ORL, Department of Neuroscience, KU Leuven, Belgium

13 <sup>f</sup> Dyslexia Center, University of California, San Francisco, CA USA

14 <sup>g</sup> Haskins Laboratories, New Haven, CT USA

15 <sup>h</sup> Department of Neuropsychiatry, Keio University School of Medicine, Japan

16 **† Corresponding Author:** Fumiko Hoeft, Department of Psychological Sciences  
17 and Brain Imaging Research Center, University of Connecticut, 850 Bolton Rd  
18 #1271, Storrs, CT 06269; E-mails: [fumiko.hoeft@uconn.edu](mailto:fumiko.hoeft@uconn.edu).

19 **Abbreviated Title:** Thalamus mediates PatAGE effect on reading

20 **Authors' Contributions:** F. Hoeft designed the study and collected data with her  
21 students. F. Hoeft, Z.C. Xia and C. Wang conceived the particular idea of the  
22 manuscript. Z.C. Xia, C. Wang and M. Vandermosten analyzed the data. Z.C. Xia,  
23 F. Hoeft, C. Wang, R. Hancock, and M. Vandermosten wrote and revised the  
24 manuscript.

25 **Acknowledgments:** The authors thank all the families for their participation in  
26 this longitudinal study. They also thank Albert Galaburda and Tuong-Vi Nguyen  
27 for their thoughtful suggestions during manuscript preparation.

28 **Funding:** This study was supported by the Eunice Kennedy Shriver National  
29 Institute of Child Health and Human Development (NICHD) K23HD054720 (PI: F.  
30 Hoeft), Child Health Research Program (aka Lucile Packard Foundation for  
31 Children's Health, Spectrum Child Health & Clinical and Translational Science  
32 Award) (PI: F. Hoeft). F. Hoeft was supported by NIH R01HD078351 (PIs: R.  
33 Hendren & F. Hoeft), R01HD086168 (PIs: F. Hoeft & K. Pugh), P50HD52120 (PI: R.  
34 Wagner), R01HD044073 (PI: L. Cutting), R01HD096261 (PI: F. Hoeft),  
35 R01HD094834 (PIs: Hoeft & Hancock), U24AT011281 (PIs: Park, Chafouleas &  
36 Hoeft), R01HD094834 (PIs: N. Landi & M. Milham), NSF BCS-2029373 (PI: F.  
37 Hoeft), and Oak Foundation OCAY-19-215 (PI: F. Hoeft). Z.C. Xia was supported by  
38 China Postdoctoral Science Foundation 2019T120062 (PI: Z.C. Xia), 2018M641235  
39 (PI: Z.C. Xia) and China Scholarship Council (CSC) No.201406040106.

Thalamus mediates PatAGE effect on reading

3

40 **Conflict of Interest Statement:** The authors declare no competing financial  
41 interests.

42 **Data Availability Statement:** Data that support the findings of this study are  
43 available from the corresponding author on request.

## 44 **Abstract**

45 The importance of (inherited) genetic impact in reading development is well-  
46 established. *De novo* mutation is another important contributor that is recently  
47 gathering interest as a major liability of neurodevelopmental disorders, but has  
48 been neglected in reading research to date. Paternal age at childbirth (PatAGE) is  
49 known as the most prominent risk factor for *de novo* mutation, which has been  
50 repeatedly shown by molecular genetic studies. As one of the first efforts, we  
51 performed a preliminary investigation of the relationship between PatAGE,  
52 offspring's reading, and brain structure in a longitudinal neuroimaging study  
53 following 51 children from kindergarten through third grade. The results showed  
54 that greater PatAGE was associated significantly with worse reading, explaining an  
55 additional 9.5% of the variations after controlling for a number of confounds—  
56 including familial factors and cognitive-linguistic reading precursors. Moreover, this  
57 effect was mediated by volumetric maturation of the left posterior thalamus from  
58 ages 5 to 8. Complementary analyses indicated the PatAGE-related thalamic region  
59 was most likely located in the pulvinar nuclei and related to the dorsal attention  
60 network by using brain atlases, public datasets, and offspring's diffusion imaging  
61 data. Altogether, these findings provide novel insights into neurocognitive  
62 mechanisms underlying the PatAGE effect on reading acquisition during its earliest  
63 phase and suggest promising areas of future research.

## 64 **Keywords**

65 Paternal age, dorsal attention network, longitudinal design, pulvinar nuclei,  
66 reading, dyslexia

## 67 **Highlights**

- 68 • Paternal age at childbirth (PatAGE) is negatively correlated with offspring's  
69 reading abilities.
- 70 • PatAGE is related to volumetric maturation of the left posterior thalamus.
- 71 • Thalamic development mediates the PatAGE effect on reading.
- 72 • The PatAGE-related thalamic area is more likely to connect with the dorsal  
73 attention network.

## 74 **Abbreviations**

75 ARHQ, Adult Reading History Questionnaire; CI, confidence interval; DAN, dorsal  
76 attention network; DNA, deoxyribonucleic acid; FDR, false discovery rate; FWE,  
77 family wise error; MatAGE, maternal age at childbirth; MNI, Montreal Neurological  
78 Institute; MRI, magnetic resonance imaging; PA, phonological awareness; PatAGE,  
79 paternal age at childbirth; pIQ, performance intelligence quotient; RAN, rapid  
80 automatized naming; RD, reading disorder; READ, reading composite score; ROI,  
81 region-of-interest; RSFC, resting-state functional connectivity; SES, socioeconomic  
82 status;  $t_1$ , time-point 1;  $t_2$ , time-point 2; TIV, total intracranial volume; V5/MT,  
83 middle temporal visual area; VAN, ventral attention network; VBM, voxel-based  
84 morphometry

## 85 **Introduction**

86           There has been a global trend of postponed childbearing, especially in  
87 developed countries (Kohler, Billari, & Ortega, 2002). This so-called “postponement  
88 transition” is primarily owing to changing patterns of education, employment, and  
89 marriage (Khandwala, Zhang, Lu, & Eisenberg, 2017; Sobotka, 2010). Although the  
90 research field is still in its infancy, increasing evidence reveals that advanced  
91 paternal age at childbirth (PatAGE) increases risks for a wide range of  
92 neuropsychiatric conditions, such as schizophrenia and autism spectrum disorders  
93 (D’Onofrio et al., 2014).

94           In contrast to mental health, few studies investigated the effects of PatAGE  
95 on offspring’s cognition, such as reading, which is essential to success in modern  
96 society. The pioneering study in 1978 reported a negatively skewed distribution of  
97 PatAGE in 48 boys with reading disorders (RD; a.k.a. and referred here to dyslexia)  
98 (Jayasekara & Street, 1978). Four decades later, the topic remains  
99 underinvestigated and the existing findings are controversial. In a broader sample  
100 of 7-year-old children, Saha and colleagues revealed a significantly negative effect of  
101 PatAGE on offspring’s reading after controlling maternal age at childbirth  
102 (MatAGE), gestational age, sex, and race (Saha et al., 2009). However, when  
103 parental education and number of siblings were added to the statistical model, the  
104 effect of PatAGE on reading was no longer significant (Edwards & Roff, 2010). Such

105 inconsistency underlies the importance of more research that controls for possible  
106 confounds examining the PatAGE effect on reading.

107         In addition to the controversy over the PatAGE effect on reading, no studies  
108 have yet examined the underlying mechanisms. Nascent research in molecular  
109 genetics, however, show that PatAGE explains nearly all the variance in the  
110 amount of *de novo* mutation, which is an alteration in a gene as the result of a  
111 mutation in a germ cell (egg or sperm) that increases by cell divisions of the  
112 gametes (approximately 38-fold in males at the age of 50 compared to females)  
113 (Breuss et al., 2019; Jónsson et al., 2017; Kong et al., 2012). Hence, *de novo*  
114 mutation is the most likely molecular mechanism underlying the PatAGE effect. In  
115 a separate line of research, *de novo* mutation is known to increase risk by up to 20-  
116 fold in neurodevelopmental disorders (De Rubeis et al., 2014; Deciphering  
117 Developmental Disorders Study, 2017). Taken together, it is conceivable that *de*  
118 *novo* mutations are at least partially responsible for the negative effect of PatAGE  
119 on offspring's mental health, offering a plausible explanation of the PatAGE effect  
120 on children's reading abilities.

121         At the neurocognitive level, whether and how cognitive-linguistic factors  
122 mediate the PatAGE effect on reading development is unknown. Studies to date  
123 have focused on genetic and environmental factors that contribute to the  
124 multifactorial liability of dyslexia (Pennington, 2006; Petrill, Deater-Deckard,  
125 Thompson, DeThorne, & Schatschneider, 2006). One such example, phonological  
126 processing, is thought to exert its effect more dominantly through inherited genetic

127 impact, often estimated by family reading history (van Bergen, Bishop, van Zuijen,  
128 & de Jong, 2015). Under the same framework, whether PatAGE serves as a  
129 contributor to the multifactorial liability, and if so, what the neural and cognitive  
130 mediators (that would likely be heritable but not inherited traits if caused by *de*  
131 *novo* mutation) are, have not been examined. Brain measures derived from  
132 neuroimaging techniques, including magnetic resonance imaging (MRI), are  
133 particularly informative as they have been suggested as mediators between genetic  
134 etiology and behavioral outcome, acting as endophenotypes (Grasby et al., 2020;  
135 Shaw et al., 2012). Further, longitudinal investigation, combined with cross-  
136 sectional analysis, can provide comprehensive insights into the neural basis  
137 underlying typical reading acquisition and its impairment (Clark et al., 2014;  
138 Yeatman, Dougherty, Ben-Shachar, & Wandell, 2012).

139       Therefore, we conducted a preliminary study examining behavioral and  
140 multimodal neuroimaging data cross-sectionally and longitudinally in a cohort of 51  
141 children followed from kindergarten through third grade in conjunction with  
142 analyses of publicly available datasets. The objective of the study was threefold: (1)  
143 to examine the relationship between PatAGE and offspring's reading while  
144 systematically controlling for potential contributing/confounding factors; (2) to  
145 examine the role of previously known cognitive-linguistic precursors,  
146 neuroanatomy, and its maturational process in relation to PatAGE and reading;  
147 and (3) to understand the functional role of the neuroanatomical findings in this



148 study by identifying convergent evidence through the use of brain atlases, public  
149 datasets, and offspring's diffusion imaging data.

## 150 **Materials and Methods**

### 151 **Participants**

152 Participants in this study were drawn from a longitudinal NIH-funded  
153 project (K23HD054720) focusing on children's reading development and followed  
154 from kindergarten (time-point 1 [*t*1], mean age = 5.58 years, *SD* = 0.43) to third  
155 grade (time-point 2 [*t*2], mean age = 8.30 years, *SD* = 0.46). All children were  
156 healthy native English speakers without neurological/psychiatric disorders (e.g.,  
157 attention deficit/hyperactivity disorder) or contraindications to MRI based on  
158 parental reports. Among the participating children, 76% were White, 6% were  
159 Asian, and 18% were of multiracial heritage. About 8% of the children identified as  
160 Hispanic or Latino. Based on the annual household income, parental educational  
161 levels, and occupation, the participants in this study were of relatively high  
162 socioeconomic status (also see Black et al., 2012). The initial sample consisted of 51  
163 children recruited from local newspapers, school mailings, flyers, and mothers'  
164 clubs. In the behavior analyses, eight children were excluded because of attrition (*n*  
165 = 5), no record of PatAGE (*n* = 1), or being siblings (*n* = 2). In the latter case, the  
166 child with poorer T1 image quality was excluded. The final sample for behavioral  
167 analyses included 43 unrelated children (17 girls). In the neuroanatomical analysis,  
168 another 7 children (2 girls) were excluded because of incomplete T1 data collection

169 or poor image quality at either time-point. In the diffusion imaging analysis, a sub-  
170 group of 23 children (8 girls) with the same acquisition sequence was included. The  
171 differences in either familial or behavioral measures between the entire and sub-  
172 groups were non-significant (all  $p$ 's > 0.1). The Institutional Review Boards of  
173 Stanford University where data were collected and the principal investigator was at  
174 the time of the study, and the University of California San Francisco where data  
175 were analyzed due to transition of the principal investigator, approved the present  
176 study. Both informed assent and consent were obtained from children and their  
177 guardians.

## 178 **Behavioral measurements**

179 Demographics, family information, and performance on behavioral tests of  
180 the participants are summarized in Table 1. Family information collected at  $t1$   
181 includes: PatAGE; MatAGE; Adult Reading History Questionnaire from both  
182 parents (PatARHQ, MatARHQ) that were used to estimate familial history of  
183 reading difficulty (Lefly & Pennington, 2000); numbers of older and younger  
184 siblings; parental education (PatEDU, MatEDU); socioeconomic status (SES), a  
185 composite index computed from annual family income, parental education, and  
186 occupation with principal component analysis (Noble, Wolmetz, Ochs, Farah, &  
187 McCandliss, 2006); Home Observation Measurement of the Environment (HOME),  
188 an index for home environment including home literacy environment (Segers,  
189 Damhuis, de Sande, & Verhoeven, 2016). A battery of behavioral tests measuring  
190 intelligence, language, and reading-related skills was administered. Verbal

191 Comprehension, Concept Formation, and Visual Matching sub-tests of the  
192 Woodcock-Johnson III Tests of Cognitive Abilities (McGrew & Schrank, 2007) were  
193 used to estimate general cognitive abilities. These tests have reliabilities of at least  
194 0.80 and have been used as a proxy for intelligence quotient (IQ) (Shaw, 2010).  
195 Vocabulary was measured with Peabody Picture Vocabulary Test (4<sup>th</sup> edition)  
196 (Dunn & Dunn, 2007). Blending, Elision, Memory for Digit, Nonword Repetition  
197 sub-tests from the Comprehensive Test of Phonological Processing (CTOPP 1<sup>st</sup>  
198 Edition) (Wagner, Torgesen, & Rashotte, 1999) were used to measure phonological  
199 skills. Rapid Automatized Naming (RAN; Objects and Colors sub-tests) (Wolf &  
200 Denkla, 2005) and Letter Identification sub-test of Woodcock Reading Mastery Test  
201 R/NU (WRMT-R/NU) (Mather, 1998) were also administered.

202         The same set of tests were used at *t*<sub>2</sub> (Table 1). Numbers and Letters sub-  
203 tests of RAN were further included to measure print-sound mapping efficiency.  
204 Additionally, we administered tests measuring different aspects of reading,  
205 including Sight Word Efficiency and Phonemic Decoding Efficiency sub-tests from  
206 the Test of Word Reading Efficiency (TOWRE 1<sup>st</sup> Edition) (Torgesen, Wagner, &  
207 Rashotte, 1999), Word Identification, Word Attack, and Passage Comprehension  
208 sub-tests from WRMT-R/NU, and Reading Fluency and Spelling sub-tests from WJ-  
209 III Tests of Achievement.

210 **Image acquisition**

211 High-resolution T1-weighted images were collected at both time-points with  
212 the following parameters: 128 slices; thickness = 1.2 mm; NEX = 1; repetition time =  
213 8.5 ms; echo time = 3.4 ms; inversion time = 400 ms; in-plane resolution =  $256 \times$   
214  $256$ ; voxel size =  $0.9 \times 0.9 \times 1.2$  mm<sup>3</sup>; flip angle = 15 °; field of view = 22 cm. High-  
215 angular resolution diffusion-imaging data were collected at *t2* with the following  
216 parameters: 46 axial slices; slice thickness = 3 mm; repetition time = 5000 ms; echo  
217 time = 81.7 ms; in-plane resolution =  $128 \times 128$ ; voxel size =  $2.0 \times 2.0 \times 3.0$  mm<sup>3</sup>;  
218 150 directions with  $b = 2500$  s/mm<sup>2</sup>; 6 volumes with  $b = 0$  s/mm<sup>2</sup>. All images were  
219 acquired using a GE Healthcare 3.0 T 750 scanner with eight-channel phased-array  
220 head coil at Richard M. Lucas Center for Imaging at Stanford University. The  
221 quality of images was qualitatively evaluated by an investigator who was blinded to  
222 the behavioral and demographic information prior to any analyses.

### 223 **Behavior analyses**

224 To reduce the dimensionality of behavioral metrics, factor analyses were  
225 conducted on reading-related tests for each time-point; *t1*: Blending, Elision,  
226 Memory for Digits, Nonword Repetition sub-tests of CTOPP, Objects and Colors  
227 sub-tests of RAN, Letter Identification sub-test of WRMT; *t2*: Blending, Elision,  
228 Memory for Digits, Nonword Repetition sub-tests of CTOPP, Numbers, Letters,  
229 Objects and Colors sub-tests of RAN, Sight Word Efficiency and Phonemic Decoding  
230 Efficiency sub-tests of TOWRE, Word Identification, Word Attack, Passage  
231 Comprehension sub-tests of WRMT-R/NU, Reading Fluency and Spelling sub-tests  
232 of WJ-III Tests of Achievement. The Maximum Likelihood, Varimax, and Bartlett

233 methods were used for extraction, rotation, and factor score calculation. The  
234 criterion of eigenvalue greater than 1 was used to identify factors. From *t*1  
235 behavioral metrics, we obtained two factors, explaining 53.8% of the total variance.  
236 Since phonological awareness (PA) and RAN loaded heavily on each factor, we  
237 named these two factors *t*1PA and *t*1RAN (Fig. 1A). Given that PA and RAN are the  
238 most reliable predictors for reading development in alphabetic languages  
239 (Caravolas et al., 2012), we used these two composite scores as cognitive-linguistic  
240 precursors of reading in subsequent analyses. Using the same approach, we  
241 extracted three factors from *t*2 behavioral metrics, explaining 67.2% of the total  
242 variance. The scores were labeled as *t*2READ, *t*2PA, and *t*2RAN according to the  
243 corresponding factor loading (Fig. 1B).

244         Since a consensus on the definition of advanced paternal age remained  
245 lacking (Couture, Delisle, Mercier, & Pennings, 2020), in this study we treated  
246 PatAGE as a continuous variable rather than separating children into different  
247 PatAGE groups. To examine the relationship between PatAGE and reading, we first  
248 calculated the zero-order correlation between them. Once the correlation was  
249 significant, hierarchical linear regressions were conducted to answer four questions  
250 in the following order: (1) whether the PatAGE effect on reading remains significant  
251 after controlling for demographic variables and general intelligence; (2) whether the  
252 PatAGE effect on reading exists after additionally regressing out MatAGE, which is  
253 known to correlate highly with PatAGE and is a possible confound; (3) whether the  
254 PatAGE effect on reading is present above and beyond familial risk (representing

255 inherited risk; Swagerman et al., 2017), and environmental factors to address the  
256 issue of multifactorial liability; (4) whether the PatAGE effect on reading is  
257 explained by *t1* cognitive-linguistic precursors of reading to examine whether the  
258 most common predictors were the mediating factor.

259       Specifically, in the first model we entered *t2* age, sex, handedness, and  
260 average performance IQ (pIQ) across *t1* and *t2* in the first step and PatAGE in the  
261 second step (Table 2). In the second model, besides the aforementioned nuisance  
262 variables, we regressed out MatAGE, which was found correlated with both  
263 PatAGE and *t2*READ. In the third model, familial risk measured by ARHQ of both  
264 parents (van Bergen et al., 2015), and environmental factors including educational  
265 level of both parents (Edwards & Roff, 2010), number of older and younger siblings  
266 (Price, 2008), SES (Pan et al., 2016), HOME (Segers et al., 2016), which are known  
267 to be associated with reading were additionally controlled. In the final model, *t1*PA  
268 and *t1*RAN were entered in the fourth step, just before PatAGE, to examine  
269 whether the PatAGE effect was present beyond *t1* cognitive-linguistic skills. Given  
270 that *t1*RAN and *t1*PA did not correlate with PatAGE (both *r*'s < 0.01; Table S1),  
271 these two cognitive-linguistic precursors were not examined further for the  
272 mediating relationship. All statistics were done with SPSS 24.0 (IBM, Inc.), and *p*-  
273 values were two-tailed while statistical significance was set at 0.05.

274 **Structural image preprocessing**

275 Both cross-sectional and longitudinal analyses were conducted by using the  
276 voxel-based morphometry toolbox (v435; <http://www.neuro.uni-jena.de/vbm/>) with  
277 SPM8 (v4667; <http://www.fil.ion.ucl.ac.uk/spm8/>) implemented in Matlab R2014a.  
278 In the cross-sectional data preprocessing for  $t1$  and  $t2$ , individual T1 volumes were  
279 segmented into gray matter, white matter, and cerebrospinal fluid with a  
280 resampling at  $1.5 \text{ mm}^3$ . Then, the gray matter segments were registered to a T1  
281 template in Montreal Neurological Institute (MNI) space by using both affine  
282 normalization and Diffeomorphic Anatomical Registration Through Exponentiated  
283 Lie Algebra (Ashburner, 2007), and subsequently modulated by the “affine and non-  
284 linear” modulation (<http://www.neuro.uni-jena.de/vbm/segmentation/modulation/>).  
285 The modulated images containing regional tissue volume of gray matter for each  
286 voxel were smoothed with an 8-mm full-width half-maximum isotropic Gaussian  
287 kernel. Voxels with gray matter values  $< 0.1$  were excluded to avoid edge effects.

288 In the longitudinal data preprocessing, the “Preprocessing of Longitudinal  
289 Data” module that contains specific preprocessing steps for processing longitudinal  
290 structural MRI data was used. Intra-subject realignment, bias correction,  
291 segmentation, and normalization were conducted sequentially as described  
292 elsewhere (Ridgway et al., 2007). After applying spatial smoothing with an 8-mm  
293 full-width half-maximum Gaussian kernel, we obtained maps of gray matter volume  
294 for both time-points. We then generated a brain map reflecting gray matter volume  
295 (GMV) change from  $t1$  to  $t2$  for each child (such that a positive value indicates  
296 enlarging from  $t1$  to  $t2$ ).

297 **Whole-brain analyses**

298       Prior to voxel-wise analyses, we examined relationships between PatAGE  
299 and global measurement (i.e., the total intracranial volume; defined as the sum of  
300 total gray matter, white matter, and cerebrospinal fluid) at each time-point ( $t1TIV$   
301 and  $t2TIV$ ). Then, we examined whether PatAGE correlated with the change of TIV  
302 from  $t1$  to  $t2$  ( $\Delta TIV$ ) while controlling for the baseline measure ( $t1TIV$ ). To explore  
303 relationships between regional GMV at each time-point (i.e., cross-sectional  
304 analyses), as well as the change of regional GMV ( $\Delta GMV$ ) across time-points  
305 ( $t2GMV-t1GMV$ ) with PatAGE (i.e., longitudinal analysis), voxel-wise whole-brain  
306 regressions were conducted while controlling for global measurements. Specifically,  
307  $t1TIV$  or  $t2TIV$  was controlled in cross-sectional analyses for  $t1$  and  $t2$ , respectively.  
308 In the longitudinal analysis,  $t1TIV$  and  $\Delta TIV$  were controlled to exclude the effects  
309 from initial gross volume and its development. Since correlations between  $t1TIV$ ,  
310  $\Delta TIV$ , and PatAGE were not significant (all  $p$ 's > 0.1), the models were free from  
311 multicollinearity. Topological Family Wise Error (FWE) correction was used to  
312 determine the corrected thresholds of statistical significance. All clusters significant  
313 at a threshold of  $p$ -cluster < 0.05 corrected for the whole brain ( $p$ -voxel < 0.001 for  
314 height) were reported in MNI space. Region-of-interest (ROI) analyses were  
315 conducted in the significant clusters to examine the robustness and specificity of the  
316 effect. For this, values of each voxel in the cluster were extracted and averaged,  
317 then included in hierarchical multiple regression analyses as the dependent  
318 variable. Demographic variables ( $t1$  or  $t2$  age, sex, handedness, average pIQ across



319  $t1$  and  $t2$  for cross-sectional data;  $t1$  age, time interval between  $t1$  and  $t2$ , sex,  
320 handedness, average pIQ across  $t1$  and  $t2$  for longitudinal data) and global  
321 measurements ( $t1$ TIV or  $t2$ TIV for cross-sectional data;  $t1$ TIV and  $\Delta$ TIV for  
322 longitudinal data) were entered in the first step, while PatAGE was entered in the  
323 second step. Then, we further controlled for MatAGE and MatARHQ since they  
324 showed significant correlations with PatAGE as in previous analyses of this study.

### 325 **Mediation analyses**

326 One of the main objectives of this study was to investigate possible  
327 neurocognitive mediators of the PatAGE effect on reading. At the brain level, two  
328 analytical strategies were used. For the primary approach, we conducted whole-  
329 brain analyses on  $t2$ READ cross-sectionally and longitudinally in the same way as  
330 we did for PatAGE. Next, we administered conjunction analysis to identify  
331 overlapping areas that showed significant associations with both PatAGE and  
332  $t2$ READ, following which the mediation relationship was examined. Alternatively,  
333 we took an ROI approach if no significant cluster survived multiple correction at the  
334 whole-brain level on  $t2$ READ. Specifically, we examined the relationship between  
335  $\Delta$ GMV and children's  $t2$ READ in the cluster significantly associated with PatAGE  
336 (hereafter PatAGE-cluster). The partial correlation coefficient was calculated while  
337 controlling for demographic variables ( $t2$  age, sex, handedness, average pIQ across  
338  $t1$  and  $t2$ ), global measurements ( $t1$ TIV and  $\Delta$ TIV), and cognitive-linguistic  
339 precursors ( $t1$ PA and  $t1$ RAN) that were significantly associated with  $t2$ READ in  
340 previous regression analysis of this study. Once a region was identified in either

341 whole-brain or ROI analysis, we examined whether the PatAGE effect on reading  
342 was mediated by brain measures. The model was adjusted for demographic  
343 variables ( $t2$  age, sex, handedness, average pIQ across  $t1$  and  $t2$ ), global  
344 measurements ( $t1TIV$ ,  $\Delta TIV$ ), and  $t1$  cognitive-linguistic precursors ( $t1RAN$  and  
345  $t1PA$ ). Bootstrapping (10,000 samples) was used to obtain 95% confidence interval  
346 of the indirect effect. If the confidence interval does not contain zero, a significant  
347 indirect effect is indicated.

348 Existing evidence suggests that dyslexia is largely genetically transmitted  
349 from parents (often assayed by parent-report of reading difficulty) (Soden et al.,  
350 2015; Swagerman et al., 2017). Further, twin studies find a dissociation between  
351 sources of variance in phonological and orthographic processes, with variance in  
352 phonological skills being primarily genetic compared to orthographic skills (Olson,  
353 Wise, Conners, Rack, & Fulker, 1989; Olson et al., 2011). These findings are  
354 consistent with the idea that PA mediates the negative effect of parental reading  
355 difficulty (a proxy for inherited genetic transmission) on reading in offspring (van  
356 Bergen et al., 2015). In line with the previous literature, we observed significant  
357 correlations between MatARHQ and  $t1PA$ , MatARHQ and  $t2READ$ ,  $t1PA$  and  
358  $t2READ$ . We therefore examined the role of PA on the relationship between the  
359 history of maternal reading difficulty and lower reading performance in offspring.  
360 Demographic variables (age at  $t2$ , sex, handedness, average pIQ across  $t1$  and  $t2$ )  
361 and the other cognitive-linguistic precursor ( $t1RAN$ ) were controlled statistically. If  
362 both a PatAGE effect (a proxy for non-inherited genetic risk) and MatARHQ effect

363 via PA processing (a proxy for inherited genetic risk) are to be observed in the  
364 current samples, this study then supports the multifactorial liability model.

365 PROCESS procedure (release 2.16.1) implemented in SPSS was used to  
366 conduct these mediation analyses (Hayes, 2013).

### 367 **Complementary analyses**

368 We adopted multiple complementary analytical approaches to depict fine-  
369 grained spatial localization and connectivity patterns of the PatAGE-cluster,  
370 capitalizing on the fact that these have been shown to inform possible functional  
371 roles of a particular brain region (in this case, the left posterior thalamus) in the  
372 absence of a comprehensive set of cognitive measures. First, we spatially localized  
373 the PatAGE-cluster with two brain atlases. (1) Given that the thalamus consists of  
374 multiple nuclei with different functions, we calculated the percentage of overlapped  
375 voxels between the PatAGE-cluster and each thalamic nucleus from the Morel  
376 Atlas, a histological atlas that is optimal for thalamic targets in MNI space (Jakab,  
377 Blanc, Berényi, & Székely, 2012; Krauth et al., 2010); (2) Given that the  
378 connectivity pattern provides information about the function of a given brain region  
379 (Barron, Eickhoff, Clos, & Fox, 2015), we used Oxford Thalamic Connectivity  
380 Probability Atlas (<https://fsl.fmrib.ox.ac.uk/fsl/fslwiki/Atlases>) with the atlasquery  
381 tool implemented in FSL to obtain the probability that the PatAGE-cluster is  
382 structurally connected to different cortical areas.

383           To further identify the possible functional roles of the PatAGE-cluster and  
384 complement the results from analyses using the histological and connectivity  
385 probability atlases, we examined PatAGE-cluster-associated cortical patterns by  
386 using online databases provided in Neurosynth v0.5 (Yarkoni, Poldrack, Nichols,  
387 Van Essen, & Wager, 2011). In particular, we generated a co-activation map by  
388 including all fMRI studies in the database ( $N > 10,900$ ), with the PatAGE-cluster as  
389 ROI. False Discovery Rate (FDR) corrected  $q < 0.01$  was used as the threshold to  
390 obtain significant regions reported in fMRI studies when the PatAGE-cluster is also  
391 reported (i.e., forward inference). In addition, we generated a map of whole-brain  
392 resting-state functional connectivity (RSFC) by using the 1000 Functional  
393 Connectome dataset (Biswal et al., 2010). The center of gravity of the PatAGE-  
394 cluster (MNI:  $x = -19.6$ ,  $y = -28.1$ ,  $z = 6.9$ ) was used as the seed, and its connectivity  
395 to the rest of the brain was calculated. The resultant brain map was thresholded  
396 with a liberal cutoff value of  $r = 0.01$ , the same as in the previous literature (Yang,  
397 Rosenblau, Keifer, & Pelphrey, 2015). To be conservative, we only considered the  
398 overlapping regions between the co-activation map and the RSFC map as the  
399 cortical pattern of the PatAGE-cluster. Sørensen-Dice coefficients between the  
400 conjunction map and the 7 large-scale intrinsic connectivity networks (i.e., visual,  
401 somatomotor, dorsal attention, ventral attention, limbic, frontoparietal, and default  
402 networks) from Yeo et al. (2011) were calculated to examine which functional  
403 network most overlapped with the PatAGE-cluster-associated cortical pattern. Here  
404 we used an adult network template because studies in Neurosynth that were used

405 to produce the co-activation map were conducted in participants with a wide range  
406 of ages and the 1000 Functional Connectome dataset mainly consists of adult data.

407         Given that the functional community structure in children is to some extent  
408 different from that in adults and the highest uncertainty was found in attention  
409 networks (Tooley, Bassett, & Mackey, 2021; Vijayakumar et al., 2021), in the final  
410 step, we examined the structural connectivity pattern in a sub-group of our own  
411 samples where diffusion imaging data were available. Moreover, we adopted a  
412 pediatric intrinsic functional network template that was extracted from 670  
413 children aged 9-11 years (Tooley et al., 2021) with the same approach as in Yeo et  
414 al. (2011). Specifically, we analyzed white matter connectivity, where fibers passing  
415 the PatAGE-cluster were reconstructed using deterministic tractography. Diffusion-  
416 weighted imaging preprocessing was performed by using ExploreDTI (Leemans,  
417 Jeurissen, Sijbers, & Jones, 2009). Next, to visually inspect for possible artefacts,  
418 rigorous motion correction with CATNAP and eddy current correction were  
419 conducted by using the required reorientation of the b-matrix (Leemans & Jones,  
420 2009). The diffusion tensors were calculated using a non-linear regression procedure  
421 (Pierpaoli & Basser, 1996). The individual datasets were non-rigidly normalized to  
422 MNI space. Next, whole-brain tractography was performed for each individual  
423 dataset using a deterministic approach (Basser, Pajevic, Pierpaoli, Duda, &  
424 Aldroubi, 2000). Fibers (streamlines) were reconstructed by defining seed points  
425 distributed uniformly throughout the data at  $2.0 \times 2.0 \times 2.0$  mm<sup>3</sup> resolution,  
426 following the main direction with the step size set at 1.0 mm. Fiber tracking was

427 discontinued when the fiber entered a voxel with fractional anisotropy  $< 0.2$  or  
428 made a high angular turn (angle  $> 40^\circ$ ) or when the fiber was outside the fiber  
429 length range of 50-500 mm. Two analyses were then conducted: (1) To localize fibers  
430 and get a general view, the PatAGE-cluster was used as ROI and all fibers passing  
431 through the ROI were delineated. The delineated fibers and their projection points  
432 were visually inspected, after which individual maps were binarized and summed to  
433 acquire the probabilistic map across participants. (2) To complement the  
434 Neurosynth analysis above and identify the functional network most relevant to the  
435 PatAGE-cluster, the number of streamlines passing through the PatAGE-cluster  
436 and each of the 7 template pediatric functional networks (Tooley et al., 2021) was  
437 calculated and normalized by dividing global density of the target network  
438 (percentage of total voxels). The results were treated as the connectivity strength  
439 and compared between candidate networks achieved in the previous analyses.  
440 Furthermore, we examined the correlations between the connectivity strength with  
441 PatAGE and *t2*READ.

## 442 **Results**

### 443 **PatAGE is negatively associated with offspring's reading above and** 444 **beyond commonly known predictors**

445 PatAGE ( $M = 36.12$  years,  $SD = 4.91$ ,  $Range = 25-47$ ; Table 1; Fig. S1A) was  
446 positively correlated with MatAGE ( $r = 0.63$ ,  $p = 5 \times 10^{-6}$ ) but not with other  
447 potentially confounding demographic variables reported in the past such as SES,

448 number of siblings and parental education (all  $p$ 's  $> 0.1$ ; Table S1). As to the main  
449 objective of this study, greater PatAGE was significantly correlated with lower  
450 reading composite scores in offspring ( $t2$ READ;  $r = -0.39$ ,  $p = 0.011$ ). Similar to  
451 PatAGE and not surprisingly, MatAGE was negatively correlated with  $t2$ READ ( $r =$   
452  $-0.33$ ,  $p = 0.031$ ). No significant correlations were found between PatAGE and  
453 cognitive-linguistic skills typically found to be predictors of later reading ability at  
454 either time-point ( $p$ 's  $> 0.1$ , for  $t1$ PA,  $t1$ RAN,  $t2$ PA, and  $t2$ RAN). In accordance with  
455 prior literature on factors that predict reading outcomes (Segers et al., 2016;  
456 Thompson et al., 2015; van Bergen et al., 2015), lower  $t2$ READ was predicted by  
457 poorer reading reported by mothers (MatARHQ;  $r = -0.46$ ,  $p = 0.002$ ), poorer home  
458 literacy environment measured by HOME ( $r = 0.31$ ,  $p = 0.047$ ), and poorer  
459 cognitive-linguistic skills at time-point 1 ( $t1$ PA:  $r = 0.46$ ,  $p = 0.002$ ;  $t1$ RAN:  $r = 0.31$ ;  
460  $p = 0.041$ ).

461 To examine whether the PatAGE effect on reading existed above and beyond  
462 commonly identified confounds and additional variables known to influence reading  
463 development, hierarchical linear regressions were conducted with  $t2$ READ as the  
464 dependent variable in a systematic and hypothesis-driven fashion. In the first  
465 model, before PatAGE was entered, demographic variables ( $t2$  age, sex, handedness)  
466 and general intelligence (average  $pIQ$  across two time-points) were entered as  
467 predictors in the first step. The negative effect of advanced PatAGE remained  
468 significant, explaining an additional 14.9% of the variance ( $t = -3.12$ ,  $p = 0.004$ ;  
469 Model 1 in Table 2). In the second model, MatAGE was further added in the second

470 step, since it was significantly correlated with PatAGE and *t2*READ. As shown in  
471 Table 2 (Model 2), PatAGE explained an additional 9.7% of the variance in reading  
472 outcomes ( $t = -2.48$ ,  $p = 0.018$ ). Then, in the third model, familial risk (PatARHQ,  
473 MatARHQ) and environmental factors (number of siblings, parental education,  
474 SES, and HOME) in relation to reading development were added. We still observed  
475 a significant PatAGE effect, explaining an additional 10.7% of the variance ( $t = -$   
476  $2.45$ ,  $p = 0.023$ ; Model 3 in Table 2). Thus far, we demonstrated that the PatAGE  
477 effect on reading was not accounted for by factors that predict children's reading  
478 outcomes and known to be either inherited or environmental. In the final model, we  
479 investigated its relationship with early cognitive-linguistic predictors of reading  
480 outcomes by entering *t1*PA and *t1*RAN in the fourth step. The PatAGE effect on  
481 offspring's reading was above and beyond that of cognitive-linguistic variables,  
482 explaining an additional 9.5% of the variance ( $t = -2.71$ ,  $p = 0.014$ ; Model 4 in Table  
483 2; Fig. S1B). In accord with the prior literature, *t1*PA and *t1*RAN also significantly  
484 predicted *t2*READ in the final model and accounted for 13.8% of the variation  
485 (*t1*PA:  $t = 2.87$ ,  $p = 0.010$ ; *t1*RAN:  $t = 2.19$ ,  $p = 0.042$ ). That is, contributions from  
486 PatAGE and cognitive-linguistic precursors were relatively independent, and they  
487 jointly predicted children's reading outcomes.

#### 488 **PatAGE is associated with thalamic maturation**

489 In the brain analyses, we did not observe significant correlations between  
490 PatAGE and TIV at *t1* ( $r = -0.27$ ,  $p = 0.109$ ), *t2* ( $r = -0.29$ ,  $p = 0.085$ ), or  $\Delta$ TIV from *t1*  
491 to *t2* ( $r = -0.11$ ,  $p = 0.537$ ). Second, whole-brain analyses on regional GMV at each



492 time-point did not show any significant clusters at the FWE corrected threshold of  
493  $p$ -cluster  $< 0.05$  ( $p$ -voxel  $< 0.001$  for height). Finally, we examined the PatAGE  
494 effect on regional  $\Delta$ GMV while controlling for  $t1$ TIV and  $\Delta$ TIV. Results revealed a  
495 significantly positive correlation between PatAGE and  $\Delta$ GMV in a cluster covering  
496 the left posterior thalamus (i.e., PatAGE-cluster;  $p = 0.015$ , FWE corrected, 367  
497 voxels, 1,239 mm<sup>3</sup>, peak MNI coordinate [-27, -30, 6]; Fig. 2A). Specifically, greater  
498 PatAGE was associated with less GMV decrease. To verify that this effect was not  
499 due to confounds, hierarchical linear regression analyses were performed. In the  
500 first model, after regressing out nuisance variables commonly controlled in  
501 longitudinal VBM analysis ( $t1$  age, time interval between  $t1$  and  $t2$ , sex,  
502 handedness, average pIQ across  $t1$  and  $t2$ ,  $t1$ TIV and  $\Delta$ TIV), PatAGE explained  
503 35.2% of the  $\Delta$ GMV variance of the PatAGE-cluster ( $t = 4.71$ ,  $p < 0.001$ ). Since  
504 MatARHQ and MatAGE were significantly correlated with PatAGE, we additionally  
505 included them as covariates in the second model, and found PatAGE still explained  
506 17.1% of the  $\Delta$ GMV variance of the PatAGE-cluster ( $t = 3.18$ ,  $p = 0.004$ ; Fig. 2B).

507 **The PatAGE effect on offspring's reading is mediated by  $\Delta$ GMV in the left**  
508 **posterior thalamus**

509 First, no significant correlations were observed between  $t2$ READ with TIV at  
510 each time-point or  $\Delta$ TIV from  $t1$  to  $t2$  (all  $p$ 's  $> 0.1$ ). In either the whole-brain cross-  
511 sectional or longitudinal analyses, we did not find clusters showing GMV-reading  
512 correlations survived the FWE correction. Therefore, the subsequent analyses were  
513 conducted based on the PatAGE-cluster revealed in the previous step. After we

514 found  $\Delta$ GMV in the PatAGE-cluster was correlated with  $t2$ READ while nuisance  
515 variables ( $t2$  age, sex, handedness, average pIQ across  $t1$  and  $t2$ ), global  
516 measurements ( $t1$ TIV,  $\Delta$ TIV), and cognitive-linguistic precursors of reading ( $t1$ PA,  
517  $t1$ RAN) were statistically controlled (partial  $r = -0.48$ ,  $p = 0.011$ ; Fig. 2C), we further  
518 examined the mediation relationship. As shown in Fig. 2D,  $\Delta$ GMV significantly  
519 mediated the negative effect of advanced PatAGE on offspring's reading; 95%  
520 confidence interval was [-0.406, -0.004] when nuisance variables (age at  $t2$ , sex,  
521 handedness, average pIQ across  $t1$  and  $t2$ ), global measurements (TIV at  $t1$ ,  $\Delta$ TIV),  
522 and cognitive-linguistic precursors ( $t1$ PA,  $t1$ RAN) were statistically controlled.  
523 These results are in contrast to the commonly found results in the literature that  
524 we also find in the present study, i.e.,  $t1$ PA mediates the negative effect of family  
525 history on offspring's reading (95% confidence interval was [-0.249, -0.001] when  
526 nuisance variables (age at  $t2$ , sex, handedness, average pIQ across  $t1$  and  $t2$ ) and  
527 the other cognitive-linguistic precursor ( $t1$ RAN) were controlled; Fig. S2).

528 **PatAGE-cluster is localized in the pulvinar nuclei and linked to the dorsal**  
529 **attention network**

530 To understand the neurostructural profile of the PatAGE-cluster in the left  
531 thalamus, we compared it with a histological atlas and a connectivity atlas. 279 out  
532 of 367 voxels in the cluster overlapped with the human thalamus of the Morel  
533 histological atlas (Jakab et al., 2012; Krauth et al., 2010), while the remaining 88  
534 voxels were unlabeled, possibly because the cluster also contained white matter. As  
535 presented in Fig. 3A, within the overlapping region, 215 voxels (76.9%) were in the

536 subdivision labeled as pulvinar nuclei, especially the medial portion, known to have  
537 widespread connections with the inferior parietal lobule (Arcaro, Pinsk, & Kastner,  
538 2015). These results were corroborated by examining the Thalamic Connectivity  
539 Probability Atlas (<http://fsl.fmrib.ox.ac.uk/fsl/fslview/atlas.html>): the PatAGE-  
540 cluster was most likely localized in the subdivision that was connected to the  
541 posterior parietal cortex, with a probability of 48.2% (Fig. 3B).

542         Next, we examined the cortical pattern of the PatAGE-cluster by utilizing  
543 two approaches available in Neurosynth v0.5 (Yarkoni et al., 2011). These included  
544 the generation of a meta-analytic map of regions that co-activate with the PatAGE-  
545 cluster across more than 10,900 fMRI studies and an RSFC map from the PatAGE-  
546 cluster to the rest of the brain by using the 1000 Functional Connectome dataset  
547 (Biswal et al., 2010). The co-activated areas included subcortical structures and  
548 cortical regions such as bilateral intraparietal sulci, inferior temporal gyrus, and  
549 frontal eye fields in the frontal cortex (Fig. S3A). The RSFC map showed a similar  
550 but more widespread pattern than the co-activation map (Fig. S3B). A conjunction  
551 analysis revealed that the bilateral frontal eye fields, intraparietal sulci, middle  
552 temporal visual area (V5/MT), and cerebellum were among the overlapped regions  
553 across the two approaches, in addition to subcortical structures (Fig. S3C).

554         Sørensen-Dice coefficients ( $s$ ) between the overlapping areas and the  
555 previously identified networks deriving from resting-state functional MRI data (Yeo  
556 et al., 2011) were calculated. The derived pattern of overlapping areas showed the  
557 greatest resemblance to the dorsal attention network (DAN;  $s = 0.344$ ; Fig. 3C) and

558 to the ventral attention network (VAN;  $s = 0.254$ ), much higher than its  
559 resemblance to other networks (visual network:  $s = 0.058$ ; somatomotor network:  $s =$   
560  $0.057$ ; limbic network:  $s < 0.001$ ; frontoparietal network:  $s = 0.039$ ; and default  
561 network:  $s = 0.003$ ). Together with the aforementioned findings utilizing structural  
562 atlases, these results using large-scale fMRI databases from functional  
563 neuroimaging studies point to the attention network, particularly the DAN, to be  
564 the candidate brain functional system associated with the PatAGE-cluster in the  
565 left thalamus.

566 Finally, we analyzed diffusion imaging data available in a sub-group of 23  
567 participants to confirm DAN was more likely the candidate system associated with  
568 the PatAGE effect on reading than VAN. Because the diffusion imaging data were  
569 collected at time-point 2, different from the previous analyses with Neurosynth,  
570 here we adopted Tooley's functional network template that was extracted from data  
571 of children aged 9-11 years (Tooley et al., 2021). Using deterministic tractography,  
572 we reconstructed white matter fibers through the PatAGE-cluster, covering inferior  
573 fronto-occipital fasciculus, corticospinal tract, forceps major, superior corona  
574 radiata, as well as anterior and posterior limbs of the internal capsule. Fig. 3D  
575 shows reconstructed fibers in a representative child and Fig. 3E shows intersection  
576 across participants, for demonstrative purposes. In line with previous findings of  
577 this study, the PatAGE-cluster showed significantly stronger connectivity (defined  
578 as the total number of streamlines divided by global density of the target network  
579 [percentage of total voxels]) with DAN than with VAN ( $t = 5.24$ ,  $p < 0.001$ ; Fig. 3F).

580 No significant correlations were found between PatAGE-cluster-Network  
581 streamlines and PatAGE or *t2*READ (all  $p$ 's > 0.1).

## 582 **Discussion**

583 In this study, we observed a significantly negative effect of advanced PatAGE  
584 on offspring's reading at the earliest stages of formal schooling from ages 5 to 8,  
585 independent of confounds (e.g., maternal age) and factors that play key roles in  
586 learning to read (i.e., family reading history, environmental factors, and cognitive-  
587 linguistic precursors of reading), explaining an additional 9.5% of the variance.  
588 Furthermore, we revealed volumetric maturation of the left thalamus as a potential  
589 neural endophenotype mediating this effect. We identified that this area is most  
590 relevant to the dorsal attention network with brain atlases, public datasets, and  
591 offspring's diffusion imaging data. These findings contrast and complement the  
592 current literature linking phonological and orthographic processing in reading to  
593 the left temporo-parietal and occipito-temporal regions. The mediation revealed  
594 here was distinct from the mediating role of phonological processing on the  
595 relationship between reading and familial risk, which has been attributed to  
596 hereditary effects. Taken together, this study provides novel and converging  
597 evidence suggesting PatAGE as a significant factor that is associated with  
598 offspring's reading, independent of phonological processing, possibly through the  
599 maturational process of the left posterior thalamus.

600 **The PatAGE effect on offspring's reading**

601           Jayasekara and Street (1978), for the first time, reported that advanced  
602 PatAGE was associated with a greater incidence of dyslexia, independent of SES  
603 and birth order. While the analysis was conducted in dyslexic boys, Saha and  
604 colleagues extended the finding to a broader population of 7-year-old children with  
605 varying reading abilities measured using Wide Range Achievement Test (Saha et  
606 al., 2009). Negative PatAGE effects on several cognitive measures, including  
607 reading, were observed after controlling for confounds that included MatAGE, SES,  
608 and parental psychiatric illness. A follow-up study re-analyzed the same dataset  
609 and found that the PatAGE effect was no longer significant after further adjusting  
610 parental education and the number of siblings (Edwards & Roff, 2010). Therefore,  
611 the PatAGE effect on reading was equivocal, and the inconsistency was related to  
612 covariates controlled in the model, especially parental characteristics such as  
613 educational level.

614           In the present study, with the range of PatAGE restricted to 25-47 years, we  
615 found PatAGE was negatively associated with reading performance measured using  
616 a variety of tests, even after additionally controlling for strong predictors of reading  
617 that were not included in previous studies (Edwards & Roff, 2010; Saha et al.,  
618 2009). These predictors included familial reading history and cognitive-linguistic  
619 skills (e.g., phonological processing) that shown to be more genetically than  
620 environmentally mediated, as well as home literacy environment (Hulme, Snowling,  
621 Caravolas, & Carroll, 2005; Swagerman et al., 2017; van Bergen et al., 2015). These  
622 findings support an adverse PatAGE effect on reading and suggest such effect may

623 occur through a mechanism different to factors such as inherited genetic and  
624 environmental risks.

625         While the number of studies examining the PatAGE effect on reading is too  
626 few to infer the potential mechanisms, studies on PatAGE-linked neuropsychiatry  
627 disorders offer insights. One predominant explanation is that advanced PatAGE  
628 exerts its effect on the risk of disorders such as autism and schizophrenia through  
629 accumulated *de novo* genetic mutations and epigenetic modifications (e.g., DNA  
630 methylation and repressive histone modification) in paternal gametes (Deciphering  
631 Developmental Disorders Study, 2017; Girard et al., 2016; Saha et al., 2009).

632         At a more macroscopic scale, understanding of the mechanisms can be  
633 deepened by identifying intermediate (endo)phenotypes through behavioral and  
634 neuroimaging measures such as we did in the current study. That is, advanced  
635 PatAGE may impact precursors of neurodevelopmental disorders, which in turn  
636 leads to a higher occurrence of such disorders (Cannon, 2009). For example, the  
637 likelihood of having impaired social functioning in offspring, a core symptom of  
638 psychiatric disorders, increases with PatAGE (Weiser et al., 2008). While the  
639 underlying mechanisms are yet to be fully understood, multifactorial liability  
640 confers risk for neurodevelopmental disorders and may involve liability such as *de*  
641 *novo* mutations in addition to inherited and environmental risks. Adding to prior  
642 research, the current study offers insights into potential mechanisms at the  
643 macroscopic level.

644 **The intermediary role of the left posterior thalamus**

645           The thalamus is an important relay center in the human brain, receiving  
646 information from sensory cortices and relaying it to higher-level association cortices.  
647 Previous studies paint a mixed picture on thalamic development: gross volume  
648 relative to its brain size is smaller (Sussman, Leung, Chakravarty, Lerch, & Taylor,  
649 2016) or larger (Brain Development Cooperative, 2012) in older compared to  
650 younger children of ages 4 to 18, and the pulvinar compared to other thalamic  
651 nuclei show no apparent change with age (Raznahan et al., 2014). Despite  
652 controversial evidence on typical thalamic maturation, its anomalous development  
653 undoubtedly affects the growth of other cortical and subcortical brain regions (Ball  
654 et al., 2012), which in turn could impact higher-level cognitive processes that  
655 underlie typical reading acquisition. In support of this, anomalies in thalamic  
656 structure (Giraldo-Chica, Hegarty, & Schneider, 2015), activation (Diaz, Hintz,  
657 Kiebel, & von Kriegstein, 2012; Koyama, Molfese, Milham, Mencl, & Pugh, 2020),  
658 and connectivity (Müller-Axt, Anwender, & von Kriegstein, 2017; Paz-Alonso et al.,  
659 2018; Tschentscher, Ruisinger, Blank, Diaz, & von Kriegstein, 2018) are associated  
660 with dyslexia. While most of these studies adopt a cross-sectional design with adult  
661 participants, here we conducted a longitudinal investigation and found the  
662 volumetric change in the posterior thalamus from ages 5 to 8 was significantly  
663 associated with PatAGE; children with younger fathers showed GMV decrease,  
664 whereas those with older fathers showed less decrease or showed an increase. This  
665 pattern suggests that PatAGE is associated with the development of this subcortical



666 structure. Noteworthy, although no significant PatAGE effect was observed when  
667 examining a single time-point, it does not indicate this effect cannot manifest at a  
668 specific age. Instead, it suggests that compared with brain morphometry at a  
669 particular time-point, PatAGE affects the maturation process more and underscores  
670 the importance of considering developmental dynamics when examining brain-  
671 behavior relationships. A similar pattern has been revealed in other neural  
672 measurements, such as white matter development in dyslexia (Yeatman et al.,  
673 2012).

674       Moreover, examination of the cluster's location with the Morel Atlas  
675 suggested the foci in the left pulvinar, an integral region supporting visuo-spatial  
676 attention (Amso & Scerif, 2015; Fischer & Whitney, 2012), and attentional control  
677 (Barron et al., 2015; Xuan et al., 2016). Analysis with connectivity-based thalamic  
678 atlas showed that this region was most likely to overlap with the subdivision  
679 connected with posterior parietal areas. Furthermore, RSFC and co-activation maps  
680 produced by Neurosynth revealed connectivity patterns were suggestive of the  
681 attention networks, especially the DAN. Finally, analysis of children's diffusion  
682 imaging-based connectivity with the pediatric functional network template was also  
683 suggestive of the DAN. Studies have repeatedly demonstrated the relationship  
684 between visuo-spatial attention and reading (Facoetti, Franceschini, & Gori, 2019;  
685 Vidyasagar & Pammer, 2010). First, visuo-spatial attention has been associated  
686 with acquiring orthographic knowledge (Stevens & Bavelier, 2012) and decoding  
687 skills (Matthews & Martin, 2015). Further, both dyslexic adults and children show

688 deficits in visuo-spatial attention, such as impaired motion perception, lower visuo-  
689 spatial span capacities, slower responses during visuo-spatial attention-orienting  
690 tasks, and local precedence on global perception (Bosse, Tainturier, & Valdois, 2007;  
691 Buchholz & Davies, 2008; Franceschini, Bertoni, Giancesini, Gori, & Facoetti, 2017;  
692 Gori, Seitz, Ronconi, Franceschini, & Facoetti, 2015). Longitudinal research also  
693 demonstrate impaired visuo-spatial processing in pre-reading kindergarteners as a  
694 causal risk factor of future poor reading (Bertoni, Franceschini, Ronconi, Gori, &  
695 Facoetti, 2019; Carroll, Solity, & Shapiro, 2015; Franceschini, Bertoni, et al., 2017;  
696 Franceschini, Gori, Ruffino, Pedrolli, & Facoetti, 2012; S. Gori & Facoetti, 2015;  
697 Gori et al., 2015). Finally, targeted interventions such as action video game training  
698 and motion discrimination training effectively improve reading and reading-related  
699 cognitive skills in affected children via enhancing visuo-spatial attention and  
700 visual-to-auditory attentional shifting (Bertoni et al., 2019; Franceschini & Bertoni,  
701 2019; Franceschini, Bertoni, et al., 2017; Franceschini et al., 2013; Franceschini,  
702 Trevisan, et al., 2017; Gori et al., 2015; Lawton, 2016). Together, these findings  
703 indicate that maturation of the pulvinar and brain networks underlying visuo-  
704 spatial attention are parsimonious neurocognitive mechanisms that may be  
705 impacted by advanced PatAGE, impeding reading acquisition. It should be noted  
706 that with the current data, we could not exclude the possibility it was the PatAGE-  
707 related individual difference in reading that influenced the maturation of thalamus  
708 and its connection with the attentional networks (Skeide et al., 2017). In fact, recent  
709 studies have revealed a bidirectional relationship between reading acquisition and

710 the development of the underlying brain networks (Wang, Joanisse, & Booth, 2020;  
711 Wang, Pines, Joanisse, & Booth, 2021). Here we proposed that paternal age may  
712 influence thalamic development, which in turn affects reading acquisition. On the  
713 other hand, as children develop reading skills, the left posterior thalamus may in  
714 turn be impacted. Further studies are needed to examine this hypothesis.

715 To date, research investigating the PatAGE effect on brain networks and  
716 corresponding cognitive processes is scarce. As the first step, Shaw et al. (2012)  
717 revealed PatAGE effects on cortical morphometry. However, the authors did not  
718 examine the relationship with cognitive functions, making the study somewhat  
719 inconclusive as to the role of PatAGE on neurocognitive processes. Taking one step  
720 further, the current study revealed thalamic maturation as an intermediary  
721 between PatAGE and reading—a specific behavioral phenotype, offering insights  
722 into the complex mechanisms underlying PatAGE effects.

### 723 **Limitations and future directions**

724 In the present study, we observed a negative PatAGE effect on offspring's  
725 reading and the left posterior thalamus as a possible brain intermediary. Given the  
726 preliminary nature of this investigation and the small sample size, the findings  
727 should be interpreted with caution until they are replicated in large independent  
728 samples. Second, PatAGE in this study was restricted to 25-47 years, with which we  
729 observed a negative linear relationship. The findings hence do not necessarily  
730 extend to children with extremely young and old fathers. For example, Saha et al.

731 (2009) observed a non-linear relationship with a range of PatAGE between 14 to 66  
732 years, while the relationship appears to be linear in the age range as ours. Of  
733 relevance, young fatherhood is also associated with adverse outcomes in offspring  
734 but possibly due to other factors, including immature sperm and economic  
735 disadvantages (Chen et al., 2008). Third, the complementary analyses implied DAN  
736 as the candidate functional system associated with PatAGE. It should be noted that  
737 the brain atlases and public datasets implemented in Neurosynth are primarily  
738 from research on adults, while children have specific characteristics regarding brain  
739 organization (Tooley et al., 2021; Vijayakumar et al., 2021). We attempted to address  
740 this issue by adopting the functional network template for children in analyzing  
741 diffusion imaging data available in a subgroup of the current samples and found  
742 that the PatAGE-cluster more strongly connected with DAN than VAN.  
743 Nevertheless, the neurostructural profile and function of the PatAGE-cluster need  
744 to be re-visited as more pediatric-specific atlases and tools are available. Fourth,  
745 while we found that the left posterior thalamus mediated the PatAGE effect on  
746 reading, it remains unknown why this subcortical structure is susceptible to  
747 advanced PatAGE (and related to *de novo* mutations). Given that typical thalamic  
748 maturation is also affected by prenatal and postnatal factors such as preterm birth  
749 (Ball et al., 2012), questions including how PatAGE influences the growth of  
750 thalamus and relevant functional systems, together with other factors, require  
751 further elaboration.

752           To advance understanding of the PatAGE effect on reading, future studies  
753 are warranted in which a more comprehensive battery of behavioral tests (e.g.,  
754 measuring visuo-spatial attention, executive function, etc.), neural measures (e.g.,  
755 task-driven activation), and molecular approaches measuring the number and  
756 origins of *de novo* mutations (e.g., trio-based whole-genome/exome sequencing; Jin  
757 et al., 2017) are included. Fusing neural, cognitive, and molecular genetic  
758 approaches at multiple levels will provide the much-needed vertical and multi-level  
759 explanatory models that will further our understanding of risk factors associated  
760 with poor reading. In particular, future research aiming at disentangling different  
761 sources of genetic variations related to reading development and their interplays  
762 will greatly further our understanding. In addition, advanced research designs such  
763 as the intergenerational neuroimaging approach can be adopted to gain in-depth  
764 knowledge on how multiple factors, including PatAGE, affect the development of  
765 offspring's reading and the corresponding networks interactively from preliteracy to  
766 mature stages of reading (Ho, Sanders, Gotlib, & Hoeft, 2016; Hoeft & Hancock,  
767 2017).

## 768 **Conclusion**

769           The current study examined the PatAGE effect on offspring's reading at both  
770 behavioral and neurobiological levels. The results provide initial evidence that  
771 advanced PatAGE is a relatively independent factor associated with poor reading  
772 outcomes in beginning readers, above and beyond previously identified familial and

773 cognitive-linguistic precursors. This effect was mediated by the maturation of the  
774 posterior thalamus, suggesting a neurobiological pathway to intergenerational  
775 influence on reading acquisition, complementing prior findings that offspring's  
776 reading is influenced by parental reading via offspring's phonological skills (van  
777 Bergen et al., 2015). Based on these findings, we argue that PatAGE should be  
778 regarded as an important factor influencing literacy development, and included in a  
779 cumulative risk (and protection) model (Hayiou-Thomas, Smith-Woolley, & Dale,  
780 2020; Menghini et al., 2010; Pennington, 2006; van Bergen, van der Leij, & de Jong,  
781 2014).

## 782 **References**

- 783 Amso, D., & Scerif, G. (2015). The attentive brain: insights from developmental  
784 cognitive neuroscience. *Nat Rev Neurosci*, *16*(10), 606-619. doi:10.1038/nrn4025
- 785 Arcaro, M. J., Pinsk, M. A., & Kastner, S. (2015). The Anatomical and Functional  
786 Organization of the Human Visual Pulvinar. *J Neurosci*, *35*(27), 9848-9871.  
787 doi:10.1523/JNEUROSCI.1575-14.2015
- 788 Ashburner, J. (2007). A fast diffeomorphic image registration algorithm.  
789 *Neuroimage*, *38*(1), 95-113. doi: 10.1016/j.neuroimage.2007.07.007
- 790 Ball, G., Boardman, J. P., Rueckert, D., Aljabar, P., Arichi, T., Merchant, N., . . .  
791 Counsell, S. J. (2012). The effect of preterm birth on thalamic and cortical  
792 development. *Cereb Cortex*, *22*(5), 1016-1024. doi:10.1093/cercor/bhr176

- 793 Barron, D. S., Eickhoff, S. B., Clos, M., & Fox, P. T. (2015). Human pulvinar  
794 functional organization and connectivity. *Human Brain Mapping, 36*(7), 2417-  
795 2431. doi:10.1002/hbm.22781
- 796 Basser, P. J., Pajevic, S., Pierpaoli, C., Duda, J., & Aldroubi, A. (2000). In vivo fiber  
797 tractography using DT-MRI data. *Magnetic Resonance in Medicine, 44*(4), 625-  
798 632. doi: 10.1002/1522-2594(200010)44:4<625::AID-MRM17>3.0.CO;2-O
- 799 Bertoni, S., Franceschini, S., Ronconi, L., Gori, S., & Facoetti, A. (2019). Is excessive  
800 visual crowding causally linked to developmental dyslexia? *Neuropsychologia,*  
801 *130*, 107-117. doi:10.1016/j.neuropsychologia.2019.04.018
- 802 Biswal, B. B., Mennes, M., Zuo, X.-N., Gohel, S., Kelly, C., Smith, S. M., . . . Milham,  
803 M. P. (2010). Toward discovery science of human brain function. *Proceedings of*  
804 *the National Academy of Sciences, 107*(10), 4734-4739.  
805 doi:10.1073/pnas.0911855107
- 806 Black, J. M., Tanaka, H., Stanley, L., Nagamine, M., Zakerani, N., Thurston, A., . . .  
807 Hoeft, F. (2012). Maternal history of reading difficulty is associated with  
808 reduced language-related gray matter in beginning readers. *Neuroimage, 59*(3),  
809 3021-3032. doi:10.1016/j.neuroimage.2011.10.024
- 810 Bosse, M.-L., Tainturier, M. J., & Valdois, S. (2007). Developmental dyslexia: The  
811 visual attention span deficit hypothesis. *Cognition, 104*(2), 198-230.  
812 doi:10.1016/j.cognition.2006.05.009
- 813 Brain Development Cooperative, G. (2012). Total and regional brain volumes in a  
814 population-based normative sample from 4 to 18 years: the NIH MRI Study of

- 815 Normal Brain Development. *Cereb Cortex*, 22(1), 1-12.  
816 doi:10.1093/cercor/bhr018
- 817 Breuss, M. W., Antaki, D., George, R. D., Kleiber, M., James, K. N., Ball, L. L., . . .  
818 Gleeson, J. G. (2019). Autism risk in offspring can be assessed through  
819 quantification of male sperm mosaicism. *Nature Medicine*. doi:10.1038/s41591-  
820 019-0711-0
- 821 Buchholz, J., & Davies, A. A. (2008). Adults with Dyslexia Demonstrate Attentional  
822 Orienting Deficits. *Dyslexia*, 14(4), 247-270. doi: 10.1002/dys.356
- 823 Cannon, M. (2009). Contrasting effects of maternal and paternal age on offspring  
824 intelligence: the clock ticks for men too. *PLoS Med*, 6(3), e42.  
825 doi:10.1371/journal.pmed.1000042
- 826 Caravolas, M., Lervag, A., Mousikou, P., Efrim, C., Litavsky, M., Onochie-  
827 Quintanilla, E., . . . Hulme, C. (2012). Common patterns of prediction of literacy  
828 development in different alphabetic orthographies. *Psychol Sci*, 23(6), 678-686.  
829 doi:10.1177/0956797611434536
- 830 Carroll, J. M., Solity, J., & Shapiro, L. R. (2016). Predicting dyslexia using  
831 prereading skills: the role of sensorimotor and cognitive abilities. *Journal of*  
832 *Child Psychology and Psychiatry*. 57(6), 750-758. doi: 10.1111/jcpp.12488
- 833 Chen, X. K., Wen, S. W., Krewski, D., Fleming, N., Yang, Q. Y., & Walker, M. C.  
834 (2008). Paternal age and adverse birth outcomes: teenager or 40+, who is at  
835 risk? *Human Reproduction*, 23(6), 1290-1296. doi:10.1093/humrep/dem403



- 836 Clark, K. A., Helland, T., Specht, K., Narr, K. L., Manis, F. R., Toga, A. W., &  
837 Hugdahl, K. (2014). Neuroanatomical precursors of dyslexia identified from pre-  
838 reading through to age 11. *Brain*, *137*(Pt 12), 3136-3141.  
839 doi:10.1093/brain/awu229
- 840 Couture, V., Delisle, S., Mercier, A., & Pennings, G. (2020). The other face of  
841 advanced paternal age: a scoping review of its terminological, social, public  
842 health, psychological, ethical and regulatory aspects. *Human reproduction*  
843 *update*. *27*(2), 305-323. doi:10.1093/humupd/dmaa046
- 844 D'Onofrio, B. M., Rickert, M. E., Frans, E., Kuja-Halkola, R., Almqvist, C.,  
845 Sjölander, A., . . . Lichtenstein, P. (2014). Paternal age at childbearing and  
846 offspring psychiatric and academic morbidity. *JAMA Psychiatry*, *71*(4), 432-438.  
847 doi:10.1001/jamapsychiatry.2013.4525
- 848 De Rubeis, S., He, X., Goldberg, A. P., Poultney, C. S., Samocha, K., Cicek, A. E., . . .  
849 Buxbaum, J. D. (2014). Synaptic, transcriptional and chromatin genes  
850 disrupted in autism. *Nature*, *515*(7526), 209-215. doi:10.1038/nature13772
- 851 Deciphering Developmental Disorders Study. (2017). Prevalence and architecture of  
852 de novo mutations in developmental disorders. *Nature*. *542*(7642), 433.  
853 doi:10.1038/nature21062
- 854 Diaz, B., Hintz, F., Kiebel, S. J., & von Kriegstein, K. (2012). Dysfunction of the  
855 auditory thalamus in developmental dyslexia. *Proc Natl Acad Sci U S A*,  
856 *109*(34), 13841-13846. doi:10.1073/pnas.1119828109

- 857 Dunn, D. M., & Dunn, L. M. (2007). *Peabody picture vocabulary test: Manual:*  
858 Pearson.
- 859 Edwards, R. D., & Roff, J. (2010). Negative effects of paternal age on children's  
860 neurocognitive outcomes can be explained by maternal education and number of  
861 siblings. *PLoS One*, 5(9), e12157. doi:10.1371/journal.pone.0012157
- 862 Facoetti, A., Franceschini, S., & Gori, S. (2019). Role of Visual Attention in  
863 Developmental Dyslexia. In C. Perfetti, K. Pugh, & L. Verhoeven (Eds.),  
864 *Developmental Dyslexia across Languages and Writing Systems* (pp. 307-326).  
865 Cambridge: Cambridge University Press.
- 866 Fischer, J., & Whitney, D. (2012). Attention gates visual coding in the human  
867 pulvinar. *Nature Communications*, 3, 1051. doi:10.1038/ncomms2054
- 868 Franceschini, S., & Bertoni, S. (2019). Improving action video games abilities  
869 increases the phonological decoding speed and phonological short-term memory  
870 in children with developmental dyslexia. *Neuropsychologia*, 130, 100-106.  
871 doi:10.1016/j.neuropsychologia.2018.10.023
- 872 Franceschini, S., Bertoni, S., Gianesini, T., Gori, S., & Facoetti, A. (2017). A  
873 different vision of dyslexia: Local precedence on global perception. *Sci Rep*, 7(1),  
874 17462. doi:10.1038/s41598-017-17626-1
- 875 Franceschini, S., Gori, S., Ruffino, M., Pedrolli, K., & Facoetti, A. (2012). A Causal  
876 Link between Visual Spatial Attention and Reading Acquisition. *Current*  
877 *Biology*, 22(9), 814-819. doi:10.1016/j.cub.2012.03.013

- 878 Franceschini, S., Gori, S., Ruffino, M., Viola, S., Molteni, M., & Facoetti, A. (2013).  
879 Action Video Games Make Dyslexic Children Read Better. *Current Biology*,  
880 23(6), 462-466. doi:10.1016/j.cub.2013.01.044
- 881 Franceschini, S., Trevisan, P., Ronconi, L., Bertoni, S., Colmar, S., Double, K., . . .  
882 Gori, S. (2017). Action video games improve reading abilities and visual-to-  
883 auditory attentional shifting in English-speaking children with dyslexia. *Sci*  
884 *Rep*, 7(1), 5863. doi:10.1038/s41598-017-05826-8
- 885 Giraldo-Chica, M., Hegarty, J. P., 2nd, & Schneider, K. A. (2015). Morphological  
886 differences in the lateral geniculate nucleus associated with dyslexia.  
887 *Neuroimage Clin*, 7, 830-836. doi:10.1016/j.nicl.2015.03.011
- 888 Girard, S. L., Bourassa, C. V., Lemieux Perreault, L. P., Legault, M. A., Barhdadi,  
889 A., Ambalavanan, A., . . . Rouleau, G. A. (2016). Paternal Age Explains a Major  
890 Portion of De Novo Germline Mutation Rate Variability in Healthy Individuals.  
891 *PLoS One*, 11(10), e0164212. doi:10.1371/journal.pone.0164212
- 892 Gori, S., & Facoetti, A. (2015). How the visual aspects can be crucial in reading  
893 acquisition: The intriguing case of crowding and developmental dyslexia.  
894 *Journal of vision*, 15(1). doi:10.1167/15.1.8
- 895 Gori, S., Seitz, A. R., Ronconi, L., Franceschini, S., & Facoetti, A. (2016). Multiple  
896 Causal Links Between Magnocellular–Dorsal Pathway Deficit and  
897 Developmental Dyslexia. *Cereb Cortex*, 26(11), 4356-4369.  
898 doi:10.1093/cercor/bhv206

- 899 Grasby, K. L., Jahanshad, N., Painter, J. N., Colodro-Conde, L., Bralten, J., Hibar,  
900 D. P., . . . Enhancing NeuroImaging Genetics through Meta-Analysis  
901 Consortium -Genetics working, g. (2020). The genetic architecture of the human  
902 cerebral cortex. *Science*, *367*(6484), eaay6690. doi:10.1126/science.aay6690
- 903 Hayes, A. F. (2013). *Introduction to mediation, moderation, and conditional process*  
904 *analysis: A regression-based approach*: Guilford Press.
- 905 Hayiou-Thomas, M. E., Smith-Woolley, E., & Dale, P. S. (2021). Breadth versus  
906 depth: Cumulative risk model and continuous measure prediction of poor  
907 language and reading outcomes at 12. *Dev Sci*, *24*(1), e12998.  
908 doi:10.1111/desc.12998
- 909 Ho, T. C., Sanders, S. J., Gotlib, I. H., & Hoefft, F. (2016). Intergenerational  
910 Neuroimaging of Human Brain Circuitry. *Trends Neurosci.* *39*(10), 644-648.  
911 doi:10.1016/j.tins.2016.08.003
- 912 Hoefft, F., & Hancock, R. (2017). Intergenerational Transmission of Reading and  
913 Reading Brain Networks. In A. M. Galaburda, N. Gaab, & F. Hoefft (Eds.),  
914 *Dyslexia and Neuroscience: The Geschwind-Galaburda Hypothesis 30 Years*  
915 *Later*. Baltimore: Paul H. Brookes Publishing Co.
- 916 Hulme, C., Snowling, M., Caravolas, M., & Carroll, J. (2005). Phonological skills are  
917 (probably) one cause of success in learning to read: A comment on Castles and  
918 Coltheart. *Scientific Studies of Reading*, *9*(4), 351-365.  
919 doi:10.1207/s1532799xssr0904\_2

- 920 Jakab, A., Blanc, R., Berényi, E., & Székely, G. (2012). Generation of individualized  
921 thalamus target maps by using statistical shape models and thalamocortical  
922 tractography. *American Journal of Neuroradiology*, *33*(11), 2110-2116.  
923 doi:10.3174/ajnr.A3140
- 924 Jayasekara, R., & Street, J. (1978). Parental age and parity in dyslexic boys.  
925 *Journal of biosocial science*, *10*(03), 255-261. doi:10.1017/S002193200001172X
- 926 Jin, Z. B., Li, Z., Liu, Z., Jiang, Y., Cai, X. B., & Wu, J. (2017). Identification of de  
927 novo germline mutations and causal genes for sporadic diseases using trio-  
928 based whole-exome/genome sequencing. *Biological Reviews*, *93*(2), 1014-1031.  
929 doi:10.1111/brv.12383
- 930 Jónsson, H., Sulem, P., Kehr, B., Kristmundsdottir, S., Zink, F., Hjartarson, E., . . .  
931 Stefansson, K. (2017). Parental influence on human germline de novo mutations  
932 in 1,548 trios from Iceland. *Nature*, *549*(7673), 519-522.  
933 doi:10.1038/nature24018
- 934 Khandwala, Y. S., Zhang, C. A., Lu, Y., & Eisenberg, M. L. (2017). The age of  
935 fathers in the USA is rising: an analysis of 168 867 480 births from 1972 to  
936 2015. *Human Reproduction*, *32*(10), 2110-2116. doi:10.1093/humrep/dex267
- 937 Kohler, H.-P., Billari, F. C., & Ortega, J. A. (2002). The Emergence of Lowest-Low  
938 Fertility in Europe During the 1990s. *Population and Development Review*,  
939 *28*(4), 641-680. doi:10.1111/j.1728-4457.2002.00641.x

- 940 Kong, A., Frigge, M. L., Masson, G., Besenbacher, S., Sulem, P., Magnusson, G., . . .  
941 Stefansson, K. (2012). Rate of de novo mutations and the importance of father's  
942 age to disease risk. *Nature*, *488*(7412), 471-475. doi:10.1038/nature11396
- 943 Koyama, M. S., Molfese, P. J., Milham, M. P., Mencl, W. E., & Pugh, K. R. (2020).  
944 Thalamus is a common locus of reading, arithmetic, and IQ: Analysis of local  
945 intrinsic functional properties. *bioRxiv*, 2020.2005.2005.076232.  
946 doi:10.1101/2020.05.05.076232
- 947 Krauth, A., Blanc, R., Poveda, A., Jeanmonod, D., Morel, A., & Szekely, G. (2010). A  
948 mean three-dimensional atlas of the human thalamus: generation from multiple  
949 histological data. *Neuroimage*, *49*(3), 2053-2062.  
950 doi:10.1016/j.neuroimage.2009.10.042
- 951 Lawton, T. (2016). Improving Dorsal Stream Function in Dyslexics by Training  
952 Figure/Ground Motion Discrimination Improves Attention, Reading Fluency,  
953 and Working Memory. *Front Hum Neurosci*, *10*(397), 397.  
954 doi:10.3389/fnhum.2016.00397
- 955 Leemans, A., Jeurissen, B., Sijbers, J., & Jones, D. (2009). *ExploreDTI: a graphical*  
956 *toolbox for processing, analyzing, and visualizing diffusion MR data*. Paper  
957 presented at the 17th Annual Meeting of Intl Soc Mag Reson Med.
- 958 Leemans, A., & Jones, D. K. (2009). The B-matrix must be rotated when correcting  
959 for subject motion in DTI data. *Magnetic Resonance in Medicine*, *61*(6), 1336-  
960 1349. doi:10.1002/mrm.21890

- 961 Lefly, D. L., & Pennington, B. F. (2000). Reliability and validity of the adult reading  
962 history questionnaire. *J Learn Disabil*, *33*(3), 286-296.  
963 doi:10.1177/002221940003300306
- 964 Mather, M. (1998). Woodcock Reading Mastery Tests—Revised/Normative Update.  
965 *Circle Pines, MN: American Guidance Service.*
- 966 Matthews, A. J., & Martin, F. H. (2015). Spatial attention and reading ability: ERP  
967 correlates of flanker and cue-size effects in good and poor adult phonological  
968 decoders. *Brain and Language*, *151*, 1-11. doi:10.1016/j.bandl.2015.10.008
- 969 McGrew, K. S., & Schrank, F. A. (2007). Technical manual. Woodcock-Johnson III  
970 normative update. *Rolling Meadows, IL: Riverside Publishing.*
- 971 Menghini, D., Finzi, A., Benassi, M., Bolzani, R., Facchetti, A., Giovagnoli, S., . . .  
972 Vicari, S. (2010). Different underlying neurocognitive deficits in developmental  
973 dyslexia: a comparative study. *Neuropsychologia*, *48*(4), 863-872.  
974 doi:10.1016/j.neuropsychologia.2009.11.003
- 975 Müller-Axt, C., Anwander, A., & von Kriegstein, K. (2017). Altered Structural  
976 Connectivity of the Left Visual Thalamus in Developmental Dyslexia. *Current*  
977 *Biology*, *27*(23), 3692-3698. doi:<https://doi.org/10.1016/j.cub.2017.10.034>
- 978 Noble, K. G., Wolmetz, M. E., Ochs, L. G., Farah, M. J., & McCandliss, B. D. (2006).  
979 Brain–behavior relationships in reading acquisition are modulated by  
980 socioeconomic factors. *Dev Sci*, *9*(6), 642-654. doi:10.1111/j.1467-  
981 7687.2006.00542.x

- 982 Olson, R., Wise, B., Conners, F., Rack, J., & Fulker, D. (1989). Specific deficits in  
983 component reading and language skills: genetic and environmental influences.  
984 *J Learn Disabil*, 22(6), 339-348. doi:10.1177/002221948902200604
- 985 Olson, R. K., Keenan, J. M., Byrne, B., Samuelsson, S., Coventry, W. L., Corley, R., .  
986 . . Hulslander, J. (2011). Genetic and Environmental Influences on Vocabulary  
987 and Reading Development. *Sci Stud Read*, 15(1), 26-46. doi:10.1007/s11145-006-  
988 9018-x
- 989 Pan, J., Kong, Y., Song, S., McBride, C., Liu, H., & Shu, H. (2016). Socioeconomic  
990 status, parent report of children's early language skills, and late literacy skills:  
991 a long term follow-up study among Chinese children. *Reading and Writing*,  
992 30(2), 401-416. doi:10.1007/s11145-016-9682-4
- 993 Paz-Alonso, P. M., Oliver, M., Lerma-Usabiaga, G., Caballero-Gaudes, C., Quinones,  
994 I., Suarez-Coalla, P., . . . Carreiras, M. (2018). Neural correlates of phonological,  
995 orthographic and semantic reading processing in dyslexia. *Neuroimage Clin*, 20,  
996 433-447. doi:10.1016/j.nicl.2018.08.018
- 997 Pennington, B. F. (2006). From single to multiple deficit models of developmental  
998 disorders. *Cognition*, 101(2), 385-413. doi:10.1016/j.cognition.2006.04.008
- 999 Petrill, S. A., Deater-Deckard, K., Thompson, L. A., DeThorne, L. S., &  
1000 Schatschneider, C. (2006). Genetic and environmental effects of serial naming  
1001 and phonological awareness on early reading outcomes. *Journal of Educational*  
1002 *Psychology*, 98(1), 112-121. doi:10.1037/0022-0663.98.1.112



- 1003 Pierpaoli, C., & Basser, P. J. (1996). Toward a quantitative assessment of diffusion  
1004 anisotropy. *Magnetic Resonance in Medicine*, *36*(6), 893-906.  
1005 doi:10.1002/mrm.1910360612
- 1006 Price, J. (2008). Parent-Child Quality Time Does Birth Order Matter? *Journal of*  
1007 *Human Resources*, *43*(1), 240-265. doi:10.3368/jhr.43.1.240
- 1008 Raznahan, A., Shaw, P. W., Lerch, J. P., Clasen, L. S., Greenstein, D., Berman, R., .  
1009 . . Giedd, J. N. (2014). Longitudinal four-dimensional mapping of subcortical  
1010 anatomy in human development. *Proc Natl Acad Sci U S A*, *111*(4), 1592-1597.  
1011 doi:10.1073/pnas.1316911111
- 1012 Ridgway, G., Camara, O., Scahill, R., Crum, W., Whitcher, B., Fox, N., & Hill, D.  
1013 (2007). Longitudinal Voxel-based morphometry with unified segmentation:  
1014 evaluation on simulated Alzheimer's disease. *British Machine Vision*  
1015 *Association*.
- 1016 Saha, S., Barnett, A. G., Foldi, C., Burne, T. H., Eyles, D. W., Buka, S. L., &  
1017 McGrath, J. J. (2009). Advanced paternal age is associated with impaired  
1018 neurocognitive outcomes during infancy and childhood. *PLoS Med*, *6*(3),  
1019 e1000040. doi:10.1371/journal.pmed.1000040
- 1020 Segers, E., Damhuis, C. M., van de Sande, E., & Verhoeven, L. (2016). Role of  
1021 executive functioning and home environment in early reading development.  
1022 *Learning and Individual Differences*, *49*, 251-259.  
1023 doi:10.1016/j.lindif.2016.07.004

- 1024 Shaw, L. A. (2010). *The relationship between the Wechsler Intelligence Scale for*  
1025 *Children-and the Woodcock-Johnson III Tests of Cognitive Abilities in a*  
1026 *clinically referred pediatric population*: Nova Southeastern University.
- 1027 Shaw, P., Gilliam, M., Malek, M., Rodriguez, N., Greenstein, D., Clasen, L., . . .  
1028 Giedd, J. (2012). Parental age effects on cortical morphology in offspring. *Cereb*  
1029 *Cortex*, 22(6), 1256-1262. doi:10.1093/cercor/bhr194
- 1030 Skeide, M. A., Kumar, U., Mishra, R. K., Tripathi, V. N., Guleria, A., Singh, J. P., . .  
1031 . Huettig, F. (2017). Learning to read alters cortico-subcortical cross-talk in the  
1032 visual system of illiterates. *Sci Adv*, 3(5), e1602612. doi:10.1126/sciadv.1602612
- 1033 Sobotka, T. (2010). Shifting Parenthood to Advanced Reproductive Ages: Trends,  
1034 Causes and Consequences. In *A young generation under pressure?* (pp. 129-154).  
1035 Berlin, Heidelberg: Springer Berlin Heidelberg.
- 1036 Soden, B., Christopher, M. E., Hulslander, J., Olson, R. K., Cutting, L., Keenan, J.  
1037 M., . . . Petrill, S. A. (2015). Longitudinal stability in reading comprehension is  
1038 largely heritable from grades 1 to 6. *PLoS One*, 10(1), e0113807.  
1039 doi:10.1371/journal.pone.0113807
- 1040 Stevens, C., & Bavelier, D. (2012). The role of selective attention on academic  
1041 foundations: a cognitive neuroscience perspective. *Dev Cogn Neurosci*, 2, S30-  
1042 48. doi:10.1016/j.dcn.2011.11.001
- 1043 Sussman, D., Leung, R. C., Chakravarty, M. M., Lerch, J. P., & Taylor, M. J. (2016).  
1044 Developing human brain: age-related changes in cortical, subcortical, and  
1045 cerebellar anatomy. *Brain and Behavior*, 6(4), e00457. doi:10.1002/brb3.457

- 1046 Swagerman, S. C., van Bergen, E., Dolan, C., de Geus, E. J. C., Koenis, M. M. G.,  
1047 Hulshoff Pol, H. E., & Boomsma, D. I. (2017). Genetic transmission of reading  
1048 ability. *Brain and Language*, *172*, 3-8. doi:10.1016/j.bandl.2015.07.008
- 1049 Thompson, P. A., Hulme, C., Nash, H. M., Gooch, D., Hayiou-Thomas, E., &  
1050 Snowling, M. J. (2015). Developmental dyslexia: predicting individual risk. *J*  
1051 *Child Psychol Psychiatry*, *56*(9), 976-987. doi:10.1111/jcpp.12412
- 1052 Tooley, U. A., Bassett, D. S., & Mackey, A. P. (2021). Functional brain network  
1053 community structure in childhood: Unfinished territories and fuzzy boundaries.  
1054 *bioRxiv*, 2021.2001.2021.427677. doi:10.1101/2021.01.21.427677
- 1055 Torgesen, J. K., Wagner, R., & Rashotte, C. (1999). TOWRE–2 Test of Word  
1056 Reading Efficiency. *Austin, TX: Pro-Ed*.
- 1057 Tschentscher, N., Ruisinger, A., Blank, H., Diaz, B., & von Kriegstein, K. (2018).  
1058 Reduced structural connectivity between left auditory thalamus and the  
1059 motion-sensitive planum temporale in developmental dyslexia. *arXiv preprint*  
1060 *arXiv:1811.11658*.
- 1061 van Bergen, E., Bishop, D., van Zuijen, T., & de Jong, P. F. (2015). How does  
1062 parental reading influence children's reading? A study of cognitive mediation.  
1063 *Scientific Studies of Reading*, *19*(5), 325-339.  
1064 doi:10.1080/10888438.2015.1050103
- 1065 van Bergen, E., van der Leij, A., & de Jong, P. F. (2014). The intergenerational  
1066 multiple deficit model and the case of dyslexia. *Front Hum Neurosci*, *8*(346),  
1067 346. doi:10.3389/fnhum.2014.00346

- 1068 Vidyasagar, T. R., & Pammer, K. (2010). Dyslexia: a deficit in visuo-spatial  
1069 attention, not in phonological processing. *Trends Cogn Sci*, 14(2), 57-63.  
1070 doi:10.1016/j.tics.2009.12.003
- 1071 Vijayakumar, N., Ball, G., Seal, M. L., Mundy, L., Whittle, S., & Silk, T. (2021). The  
1072 development of structural covariance networks during the transition from  
1073 childhood to adolescence. *Sci Rep*, 11(1), 9451. doi:10.1038/s41598-021-88918-w
- 1074 Wagner, R. K., Torgesen, J. K., & Rashotte, C. A. (1999). *Comprehensive test of*  
1075 *phonological processing: CTOPP*: Pro-ed.
- 1076 Wang, J., Joanisse, M. F., & Booth, J. R. (2020). Neural representations of  
1077 phonology in temporal cortex scaffold longitudinal reading gains in 5- to 7-year-  
1078 old children. *Neuroimage*, 207, 116359. doi:10.1016/j.neuroimage.2019.116359
- 1079 Wang, J., Pines, J., Joanisse, M., & Booth, J. R. (2021). Reciprocal relations between  
1080 reading skill and the neural basis of phonological awareness in 7- to 9-year-old  
1081 children. *Neuroimage*, 118083. doi:10.1016/j.neuroimage.2021.118083
- 1082 Weiser, M., Reichenberg, A., Werbeloff, N., Kleinhaus, K., Lubin, G.,  
1083 Shmushkevitch, M., . . . Davidson, M. (2008). Advanced Parental Age at Birth Is  
1084 Associated With Poorer Social Functioning in Adolescent Males: Shedding Light  
1085 on a Core Symptom of Schizophrenia and Autism. *Schizophr Bull*, 34(6), 1042-  
1086 1046. doi:10.1093/schbul/sbn109
- 1087 Wolf, M., & Denkla, M. (2005). Rapid Automated Naming and Rapid Alternating  
1088 Stimulus Tests. Austin, TX: PROED. In: Inc.

- 1089 Xuan, B., Mackie, M. A., Spagna, A., Wu, T., Tian, Y., Hof, P. R., & Fan, J. (2016).  
1090 The activation of interactive attentional networks. *Neuroimage*, *129*, 308-319.  
1091 doi:10.1016/j.neuroimage.2016.01.017
- 1092 Yang, D. Y., Rosenblau, G., Keifer, C., & Pelphrey, K. A. (2015). An integrative  
1093 neural model of social perception, action observation, and theory of mind.  
1094 *Neurosci Biobehav Rev*, *51*, 263-275. doi:10.1016/j.neubiorev.2015.01.020
- 1095 Yarkoni, T., Poldrack, R. A., Nichols, T. E., Van Essen, D. C., & Wager, T. D. (2011).  
1096 Large-scale automated synthesis of human functional neuroimaging data.  
1097 *Nature methods*, *8*(8), 665-670. doi:10.1038/nmeth.1635
- 1098 Yeatman, J. D., Dougherty, R. F., Ben-Shachar, M., & Wandell, B. A. (2012).  
1099 Development of white matter and reading skills. *Proc Natl Acad Sci U S A*,  
1100 *109*(44), E3045-3053. doi:10.1073/pnas.1206792109
- 1101 Yeo, B. T., Krienen, F. M., Sepulcre, J., Sabuncu, M. R., Lashkari, D., Hollinshead,  
1102 M., . . . Buckner, R. L. (2011). The organization of the human cerebral cortex  
1103 estimated by intrinsic functional connectivity. *Journal of Neurophysiology*,  
1104 *106*(3), 1125-1165. doi:10.1152/jn.00338.2011
- 1105

1106 **Table Legend**

1107 **Table 1** Demographic profiles, familial variables, and performance on reading-  
1108 related tests (n = 43). *Acronyms: ARHQ, Adult Reading History Questionnaire; CS,*  
1109 *composite score; CTOPP BW, Comprehensive Test of Phonological Processing,*  
1110 *Blending sub-test; CTOPP EL, Comprehensive Test of Phonological Processing,*  
1111 *Elision sub-test; CTOPP MD, Comprehensive Test of Phonological Processing,*  
1112 *Memory for Digit sub-test; CTOPP NR, Comprehensive Test of Phonological*  
1113 *Processing, Nonword Repetition sub-test; HOME, Home Observation Measurement of*  
1114 *the Environment; Mat, maternal; Pat, paternal; PPVT, Peabody Picture Vocabulary*  
1115 *Test; RAN COL, Rapid Naming, Colors sub-test; RAN LTR, Rapid Naming, Letters*  
1116 *sub-test; RAN NUM, Rapid Naming, Numbers sub-test; RAN OBJ, Rapid Naming,*  
1117 *Objects sub-test; RS, raw score; SES, socioeconomic status; SS, standard score;*  
1118 *TOWRE PDE, Test of Word Reading, Phonemic Decoding Efficiency sub-test;*  
1119 *TOWRE SWE, Test of Word Reading, Sight Word Efficiency sub-test; WJA RF,*  
1120 *Woodcock-Johnson III Tests of Achievement, Reading Fluency sub-test; WJA SP,*  
1121 *Woodcock-Johnson III Tests of Achievement, Spelling sub-test; WJC CF, Woodcock-*  
1122 *Johnson III Tests of Cognitive Abilities, Concept Formation sub-test; WJC NR,*  
1123 *Woodcock-Johnson III Tests of Cognitive Abilities, Numbers Reversed sub-test; WJC*  
1124 *VC, Woodcock-Johnson III Tests of Cognitive Abilities, Verbal Comprehension sub-*  
1125 *test; WJC VM, Woodcock-Johnson III Tests of Cognitive Abilities, Visual Matching*  
1126 *sub-test; WRMT LID, Woodcock Reading Mastery Test, Letter Identification sub-test;*  
1127 *WRMT PC, Woodcock Reading Mastery Test, Passage Comprehension sub-test;*

- 1128 *WRMT WA, Woodcock Reading Mastery Test, Word Attack sub-test; WRMT WID,*  
1129 *Woodcock Reading Mastery Test, Word Identification sub-test.*
- 1130 **Table 2** Results of multiple linear regression analyses examining the unique  
1131 contribution of paternal age on offspring's reading at time-point 2. *Acronyms:*  
1132 *ARHQ, Adult Reading History Questionnaire; EDU, educational level; HOME,*  
1133 *Home Observation Measurement of the Environment; Mat, maternal; PA,*  
1134 *phonological awareness; Pat, paternal; pIQ, performance intelligence quotient; RAN,*  
1135 *rapid naming; SES, socioeconomic status; t1, time-point 1; t2, time-point 2.*

1136 **Figure Legends**

1137 **Fig. 1** Principal components that extracted from reading-related tests. **A.**  
1138 Component loadings for each factor at time-point 1. **B.** Component loadings for each  
1139 factor at time-point 2. *Acronyms: CTOPP BW, Comprehensive Test of Phonological*  
1140 *Processing, Blending sub-test; CTOPP EL, Comprehensive Test of Phonological*  
1141 *Processing, Elision sub-test; CTOPP MD, Comprehensive Test of Phonological*  
1142 *Processing, Memory for Digit sub-test; CTOPP NR, Comprehensive Test of*  
1143 *Phonological Processing, Nonword Repetition sub-test; RAN COL, Rapid Naming,*  
1144 *Colors sub-test; RAN LTR, Rapid Naming, Letters sub-test; RAN NUM, Rapid*  
1145 *Naming, Numbers sub-test; RAN OBJ, Rapid Naming, Objects sub-test; t1, time-*  
1146 *point 1; t2, time-point 2; TOWRE PDE, Test of Word Reading, Phonemic Decoding*  
1147 *Efficiency sub-test; TOWRE SWE, Test of Word Reading, Sight Word Efficiency sub-*  
1148 *test; WJA RF, Woodcock-Johnson III Tests of Achievement, Reading Fluency sub-*  
1149 *test; WJA SP, Woodcock-Johnson III Tests of Achievement, Spelling sub-test; WRMT*  
1150 *LID, Woodcock Reading Mastery Test, Letter Identification sub-test; WRMT PC,*  
1151 *Woodcock Reading Mastery Test, Passage Comprehension sub-test; WRMT WA,*  
1152 *Woodcock Reading Mastery Test, Word Attack sub-test; WRMT WID, Woodcock*  
1153 *Reading Mastery Test, Word Identification sub-test.*

1154 **Fig. 2** Results of the whole-brain longitudinal voxel-based morphometry and region-  
1155 of-interest (ROI) analysis. **A.** Brain region significantly correlated with paternal age  
1156 (the yellow cluster; defined as ROI). **B.** Scatter plot of the relationship between gray



1157 matter volume change in the ROI and paternal age. The linear regression line is  
1158 presented. **C.** Scatter plot of the relationship between gray matter volume change in  
1159 the ROI and composite score of reading at time-point 2. The linear regression line is  
1160 presented. **D.** The effect of paternal age on offspring's reading is mediated by gray  
1161 matter volume change in the thalamus. Confounds were controlled statistically. The  
1162 bias-corrected 95% confidence interval for indirect effect was [-0.406, -0.004],  
1163 indicating a significant mediation relationship. \*\*\*  $p < 0.001$ ; \*\*  $p < 0.01$

1164 **Fig. 3** Results of the complementary analyses on the PatAGE-cluster (i.e., the left  
1165 posterior thalamus) with atlases, public database, and white matter tractography of  
1166 the PatAGE-related thalamic region using subject-specific diffusion imaging data.  
1167 **A.** Bar plot displaying the percentage of total voxels in the PatAGE-cluster overlaps  
1168 with divisions of the Morel Atlas ([https://www.lead-dbs.org/helpsupport/knowledge-](https://www.lead-dbs.org/helpsupport/knowledge-base/atlasesresources/atlases/)  
1169 [base/atlasesresources/atlases/](https://www.lead-dbs.org/helpsupport/knowledge-base/atlasesresources/atlases/)). **B.** Bar plot showing the probability of the cluster  
1170 belonging to different subdivisions of the Oxford Thalamic Connectivity Probability  
1171 Atlas (<https://fsl.fmrib.ox.ac.uk/fsl/fslwiki/Atlases>), calculated by the “autoaq”  
1172 function implemented in FSL. **C.** Bar plot showing the degree of overlap between  
1173 the overlapping areas of Neurosynth-derived co-activation/resting-state functional  
1174 connectivity maps and Yeo's 7 intrinsic functional networks represented by Dice  
1175 coefficients. Dice coefficient measures the similarity between the overlapping areas  
1176 and a given function network, ranging from 0 to 1. While 0 indicates the two  
1177 networks are disjoint, 1 indicates the two networks are identical. **D.** Example of  
1178 reconstructed fibers in a representative child with the seed being the PatAGE-

1179 cluster. E. Intersection across 23 children with diffusion imaging data is shown for  
1180 demonstrative purposes. The color bar represents the number of subjects where the  
1181 streamline is observed in a given voxel. F. The DAN compared to the VAN derived  
1182 from Tooley's 7 intrinsic functional networks derived from pediatric data showed a  
1183 significantly greater number of streamlines (normalized by global density of the  
1184 target network [percentage of total voxels]) to go through the PatAGE-cluster.

1185 *Acronyms: CL, central lateral nucleus; CM, central median nucleus; LP, lateral*  
1186 *posterior nucleus; VLpv, ventral lateral posterior nucleus, ventral; VPI, ventral*  
1187 *posterior inferior nucleus; VPL, ventral posterior lateral nucleus; VPM, ventral*  
1188 *posterior medial nucleus; LH, left hemisphere; RH, right hemisphere.*

1189 **Tables**

Table 1 Demographic profiles, familial variables, and performance on reading-related tests (n = 43).

|                            | <i>Mean</i> | <i>Std.Dev</i> | <i>Min</i> | <i>Max</i> |
|----------------------------|-------------|----------------|------------|------------|
| Time-point 1               |             |                |            |            |
| Age (years)                | 5.58        | 0.43           | 5.03       | 6.99       |
| Gender, Male (%)           | 60.50       | --             | --         | --         |
| Handedness, Right (%)      | 88.40       | --             | --         | --         |
| WJC VC (SS)                | 121.53      | 13.43          | 86         | 145        |
| WJC CF (SS)                | 118.16      | 11.43          | 94         | 137        |
| WJC VM (SS)                | 105.65      | 11.83          | 72         | 127        |
| WJC NR (SS)                | 112.05      | 12.06          | 83         | 138        |
| PPVT (SS)                  | 121.23      | 9.94           | 97         | 148        |
| # Older Siblings (RS)      | 0.65        | 0.81           | 0          | 3          |
| # Younger Siblings (RS)    | 0.63        | 0.62           | 0          | 2          |
| PatAGE (years)             | 36.12       | 4.91           | 24.78      | 46.71      |
| MatAGE (years)             | 33.01       | 4.09           | 23.04      | 41.08      |
| PatARHQ (RS)               | 0.35        | 0.14           | 0.09       | 0.66       |
| MatARHQ (RS)               | 0.31        | 0.15           | 0.07       | 0.67       |
| PatEDU (years)             | 16.95       | 2.05           | 13         | 22         |
| MatEDU (years)             | 16.97       | 2.04           | 12         | 22         |
| SES (CS) <sup>a</sup>      | 0.04        | 1.00           | -2.87      | 2.38       |
| HOME (RS) <sup>b</sup>     | 51.39       | 2.25           | 44         | 55         |
| CTOPP BW (SS) <sup>c</sup> | 12.28       | 1.80           | 8          | 17         |
| CTOPP EL (SS) <sup>c</sup> | 11.93       | 2.80           | 7          | 19         |
| CTOPP MD (SS) <sup>c</sup> | 10.79       | 2.22           | 7          | 16         |
| CTOPP NR (SS) <sup>c</sup> | 11.23       | 2.85           | 6          | 19         |
| RAN OBJ (SS)               | 100.56      | 17.57          | 55         | 135        |

|                            |        |       |      |      |
|----------------------------|--------|-------|------|------|
| RAN COL (SS)               | 97.98  | 16.51 | 55   | 137  |
| WRMT LID (SS)              | 109.84 | 10.84 | 80   | 138  |
| Time-point 2               |        |       |      |      |
| Age (years)                | 8.30   | 0.46  | 7.51 | 9.76 |
| WJC VC (SS)                | 116.07 | 10.18 | 92   | 144  |
| WJC CF (SS)                | 118.21 | 12.29 | 97   | 150  |
| WJC VM (SS)                | 99.23  | 15.04 | 77   | 138  |
| WJC NR (SS)                | 109.26 | 15.13 | 80   | 140  |
| PPVT (SS)                  | 120.02 | 14.56 | 81   | 160  |
| TOWRE SWE (SS)             | 111.49 | 12.29 | 86   | 138  |
| TOWRE PDE (SS)             | 106.35 | 14.85 | 77   | 144  |
| WRMT WID (SS)              | 116.23 | 11.66 | 94   | 139  |
| WRMT WA (SS)               | 113.84 | 14.40 | 90   | 146  |
| WRMT PC (SS)               | 114.91 | 9.95  | 99   | 141  |
| WJA RF (SS)                | 112.49 | 16.31 | 84   | 162  |
| WJA SP (SS)                | 105.28 | 18.33 | 74   | 148  |
| CTOPP BW (SS) <sup>c</sup> | 12.67  | 2.24  | 6    | 16   |
| CTOPP EL (SS) <sup>c</sup> | 13.00  | 3.11  | 4    | 17   |
| CTOPP MD (SS) <sup>c</sup> | 10.47  | 2.60  | 5    | 15   |
| CTOPP NR (SS) <sup>c</sup> | 10.09  | 2.26  | 6    | 16   |
| RAN NUM (SS)               | 100.35 | 12.47 | 76   | 129  |
| RAN LTR (SS)               | 102.98 | 11.63 | 78   | 134  |
| RAN OBJ (SS)               | 96.53  | 17.07 | 62   | 132  |
| RAN COL (SS)               | 97.02  | 15.29 | 60   | 121  |

Notes: <sup>a</sup> SES:  $n = 38$ ; <sup>b</sup> HOME:  $n = 41$ ; <sup>c</sup> T Scores are presented for CTOPP sub-tests where mean is 10 and SD is 3. All other test scores are in standard scores where the mean is 100 and SD is 15.

Table 2 Results of multiple linear regression analyses examining the unique contribution of paternal age on offspring's reading at time-point 2

| Model       | Step   | Predictor          | $\Delta R^2$      | $\beta$   |
|-------------|--------|--------------------|-------------------|-----------|
| 1           | 1      | Age ( <i>t</i> 2)  | 0.284 *           | -0.351 *  |
|             |        | Sex                |                   | -0.022    |
|             |        | Handedness         |                   | 0.081     |
|             |        | Average pIQ        |                   | 0.302 *   |
|             |        | PatAGE             | 0.149 **          | -0.393 ** |
| 2           | 1      | Age ( <i>t</i> 2)  | 0.284 *           | -0.351 *  |
|             |        | Sex                |                   | -0.022    |
|             |        | Handedness         |                   | 0.079     |
|             |        | Average pIQ        |                   | 0.309 *   |
|             | 2      | MatAGE             | 0.052 †           | 0.026     |
|             | 3      | PatAGE             | 0.097 *           | -0.408 *  |
|             | 3      | 1                  | Age ( <i>t</i> 2) | 0.279 *   |
| Sex         |        |                    |                   | -0.002    |
| Handedness  |        |                    |                   | 0.119     |
| Average pIQ |        |                    |                   | 0.203     |
| 2           |        | MatAGE             | 0.071 †           | 0.269     |
| 3           |        | PatARHQ            | 0.170             | -0.129    |
|             |        | MatARHQ            |                   | -0.162    |
|             |        | # Older Siblings   |                   | -0.298    |
|             |        | # Younger Siblings |                   | -0.171    |
|             |        | PatEDU             |                   | 0.031     |
|             |        | MatEDU             |                   | -0.075    |
|             |        | SES                |                   | -0.214    |
|             |        | HOME               |                   | 0.233     |
| 4           | PatAGE | 0.107 *            | -0.592 *          |           |

Thalamus mediates PatAGE effect on reading

62

|   |   |                               |         |          |
|---|---|-------------------------------|---------|----------|
| 4 | 1 | Age ( <i>t</i> <sup>2</sup> ) | 0.279 * | -0.261   |
|   |   | Sex                           |         | -0.051   |
|   |   | Handedness                    |         | 0.136    |
|   |   | Average pIQ                   |         | -0.013   |
|   | 2 | MatAGE                        | 0.071 † | 0.200    |
|   | 3 | PatARHQ                       |         | -0.105   |
|   |   | MatARHQ                       |         | -0.039   |
|   |   | # Older Siblings              |         | -0.174   |
|   |   | # Younger Siblings            |         | -0.144   |
|   |   | PatEDU                        |         | 0.086    |
|   |   | MatEDU                        |         | -0.211   |
|   |   | SES                           |         | -0.146   |
|   |   | HOME                          |         | 0.201    |
|   | 4 | Time 1 PA                     | 0.138 * | 0.423 *  |
|   |   | Time 1 RAN                    |         | 0.350 *  |
|   | 5 | PatAGE                        | 0.095 * | -0.567 * |

Note:  $\beta$  is value at the final step (all predictors included). \*\*  $p < 0.01$ ; \*  $p < 0.05$ ; †  $p < 0.1$

**A**factor 1: *t1RAN*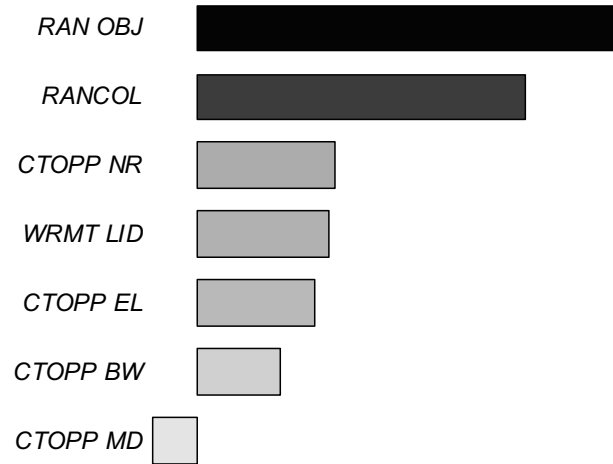factor 2: *t1PA*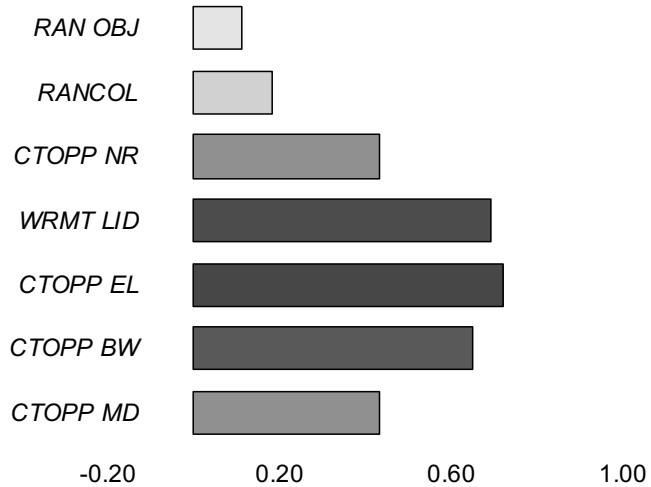**B**factor 1: *t2READ*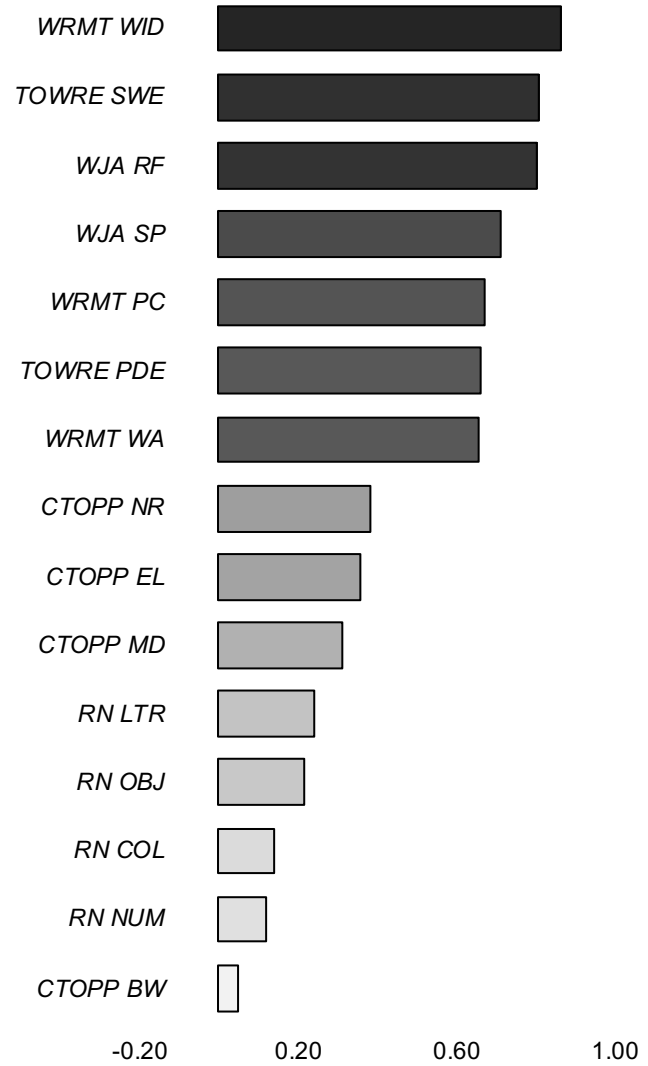factor 2: *t2RAN*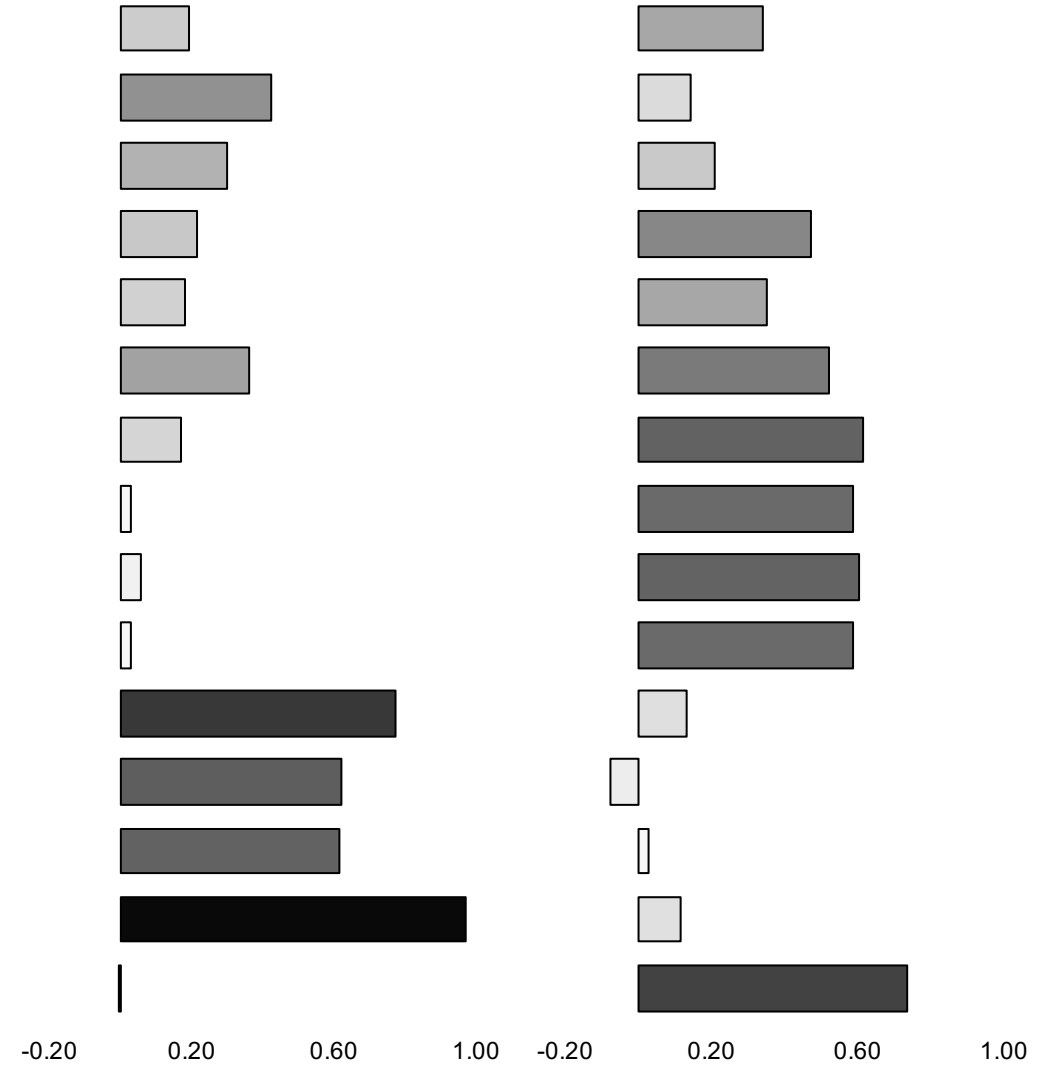factor 3: *t2PA*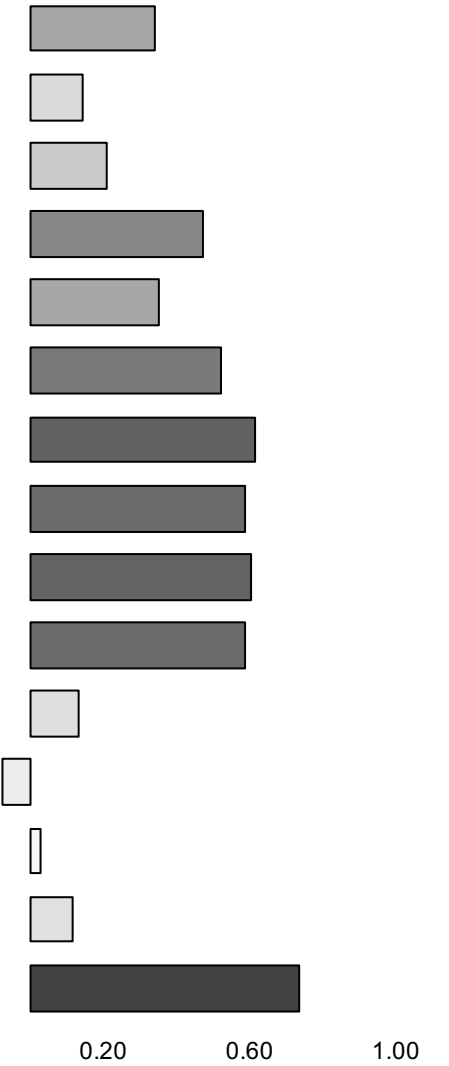

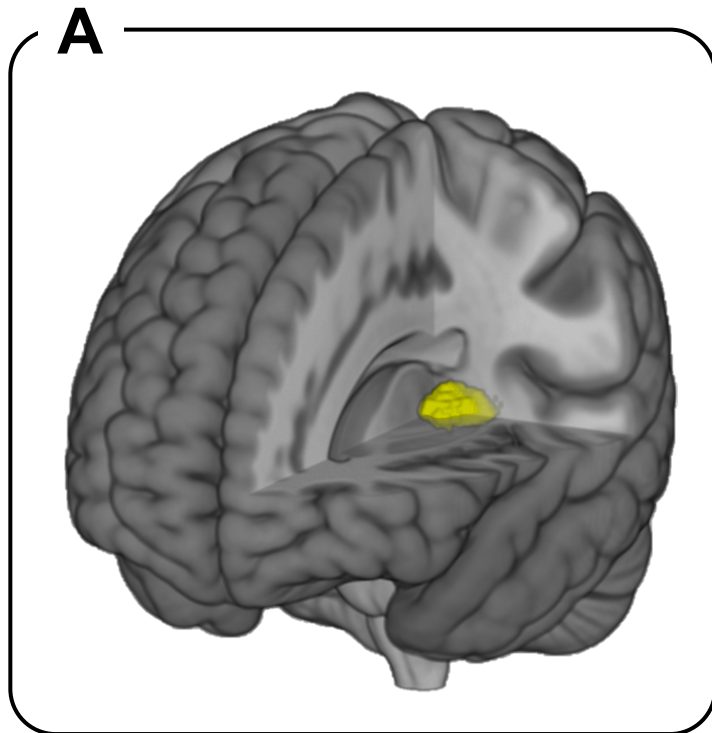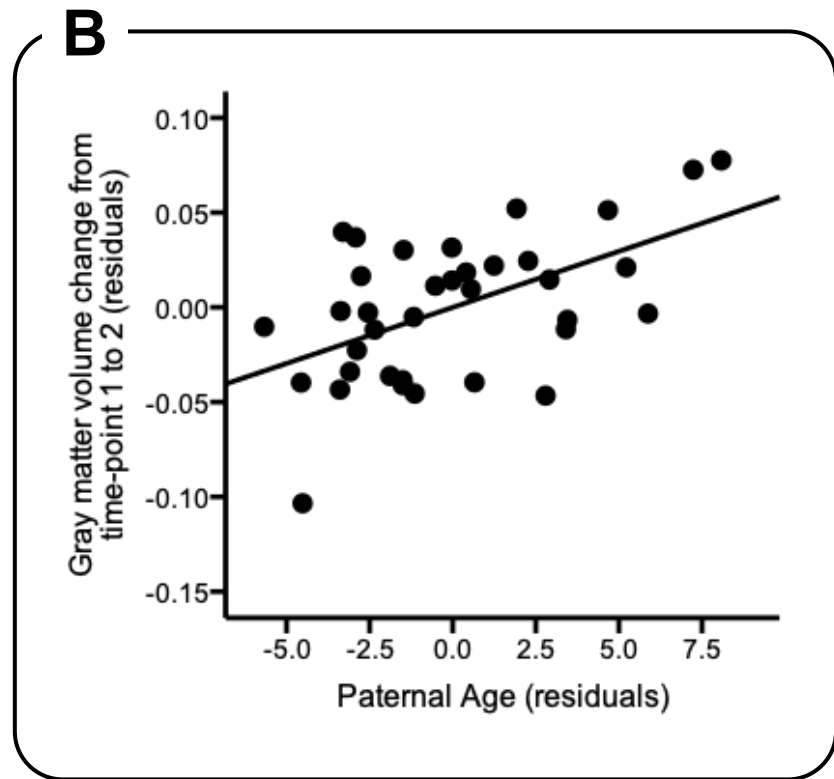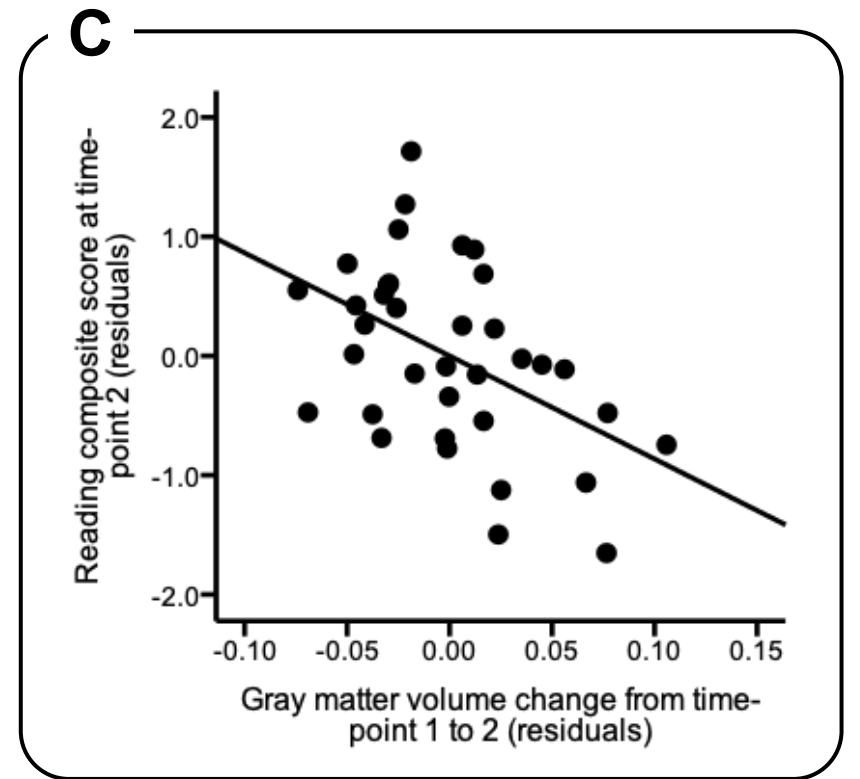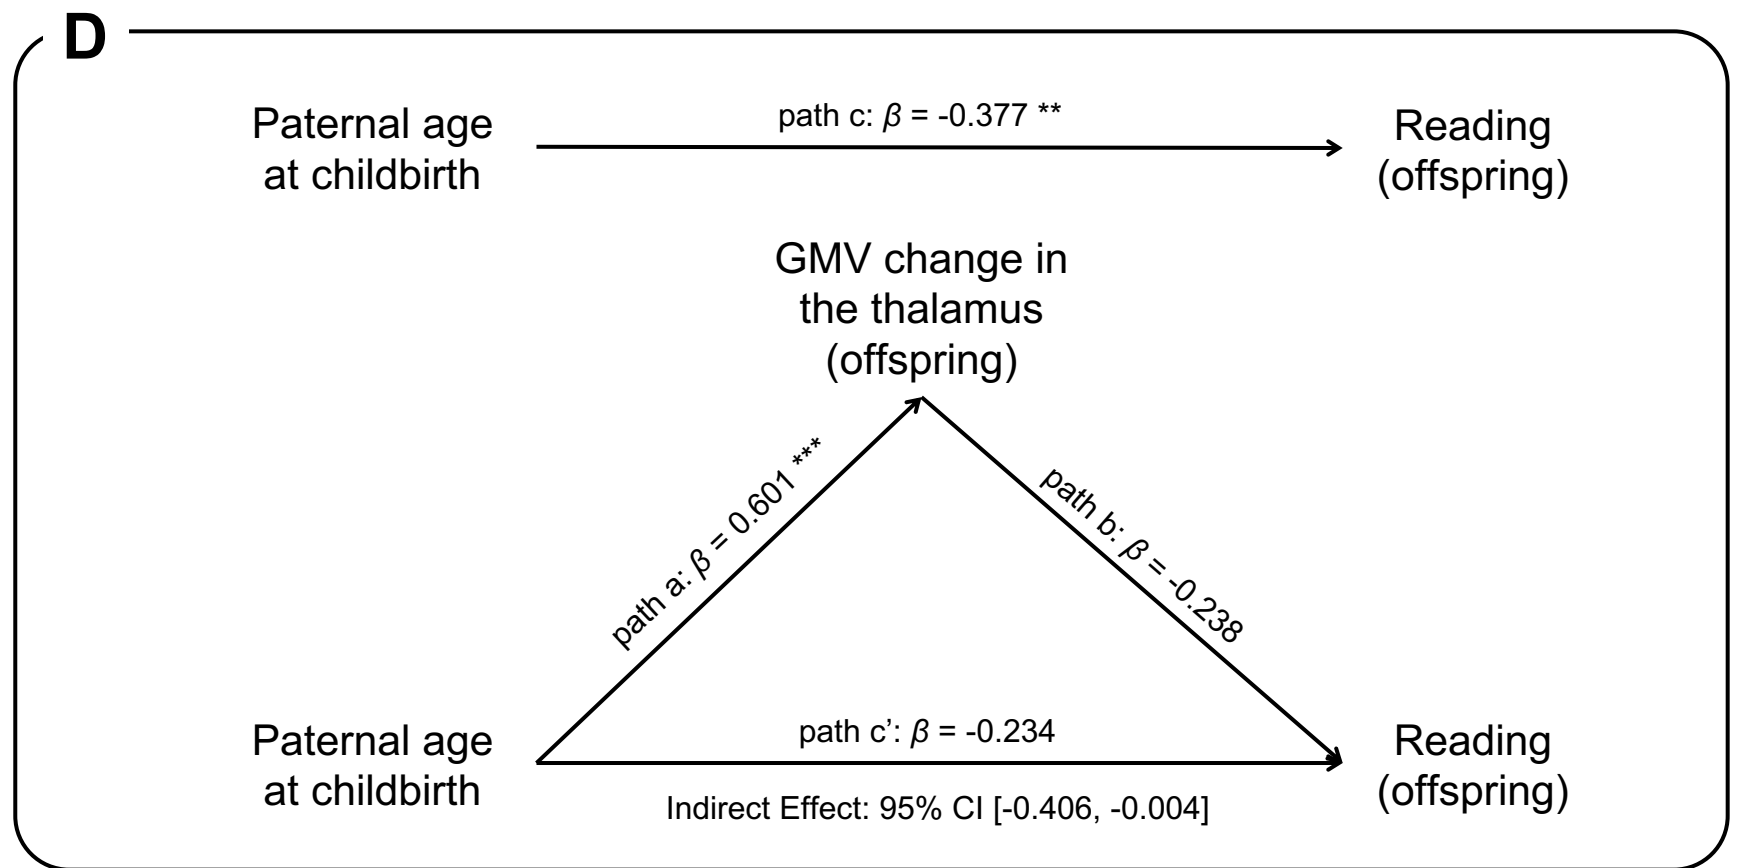



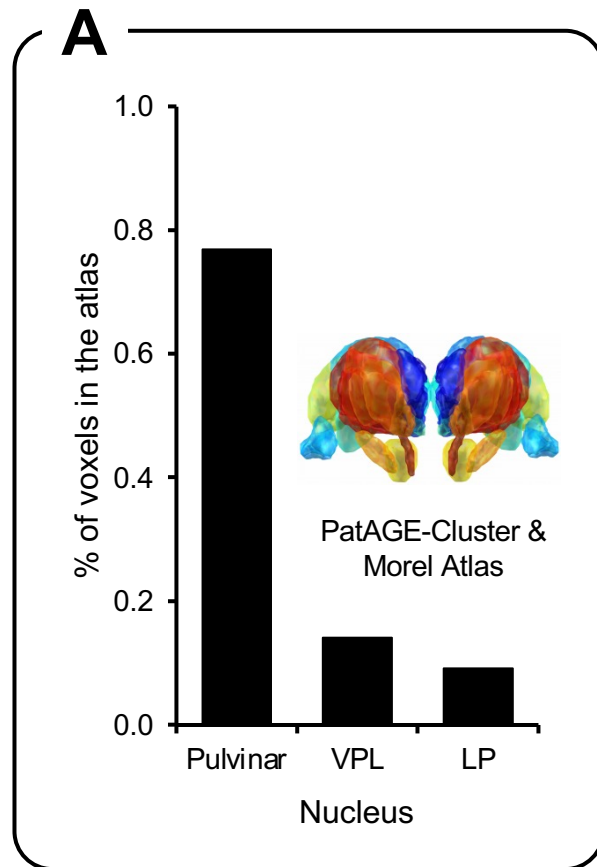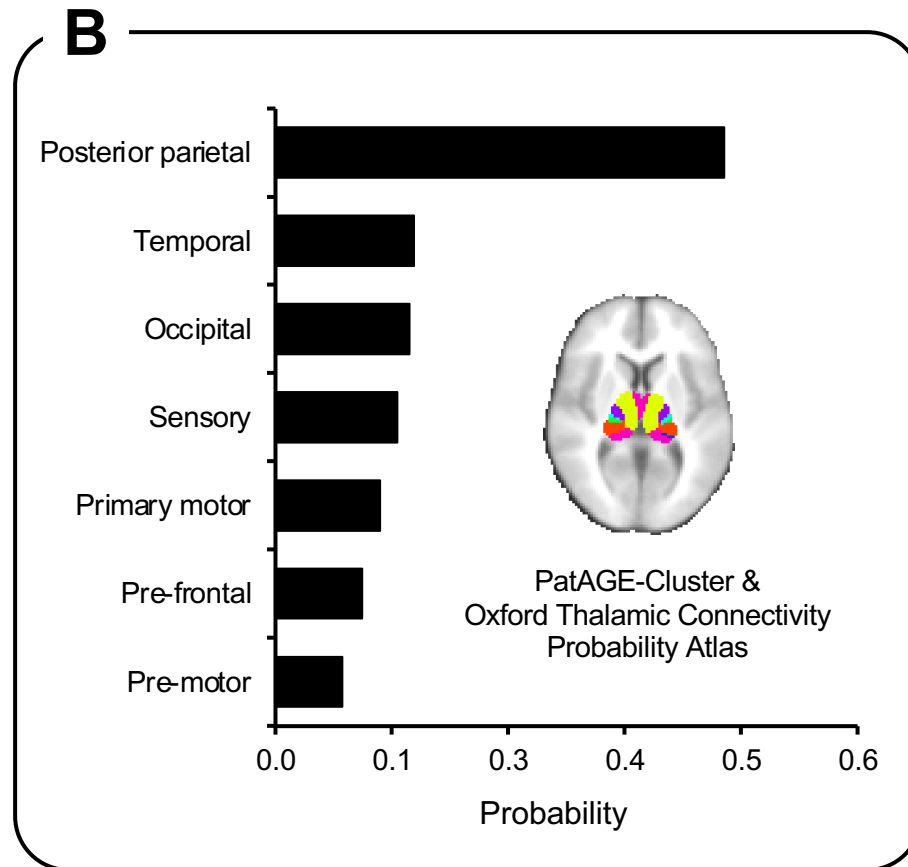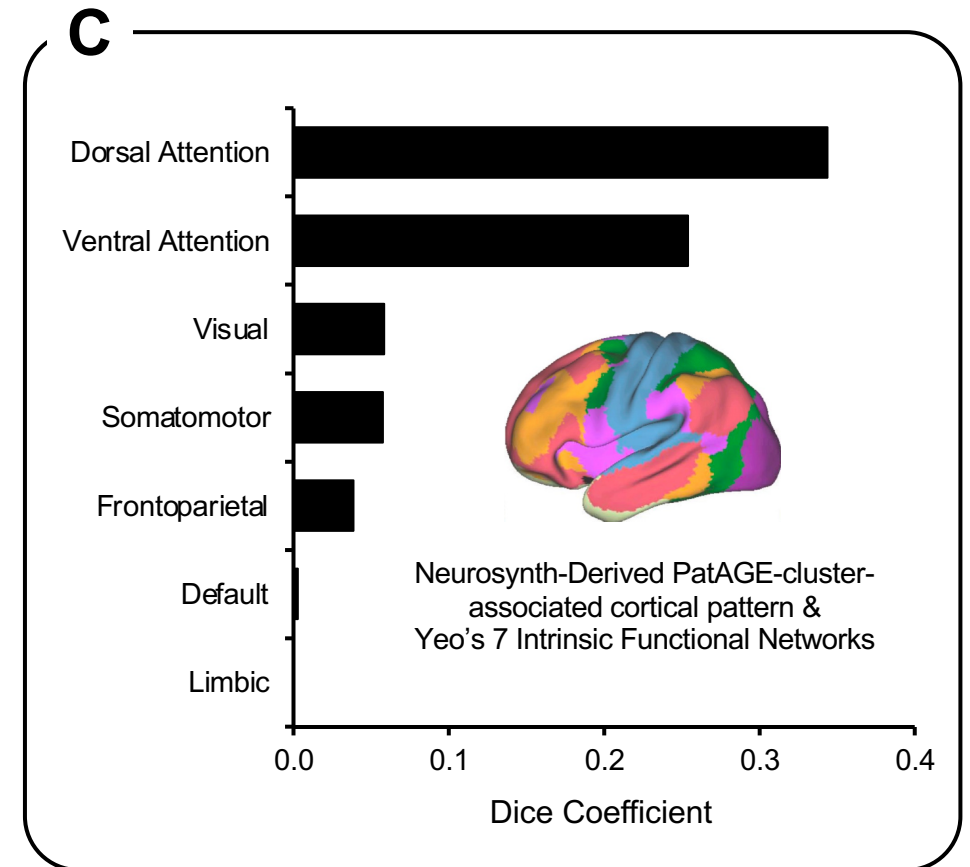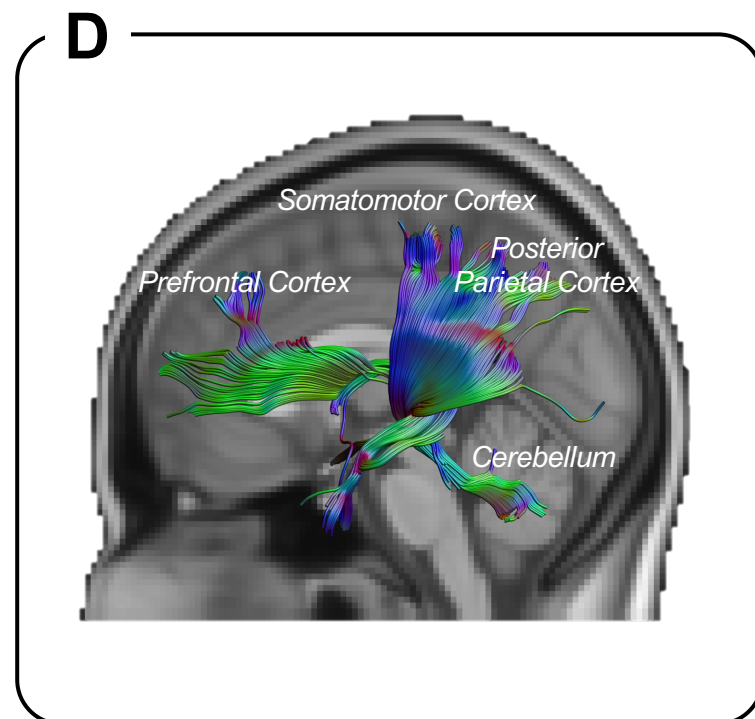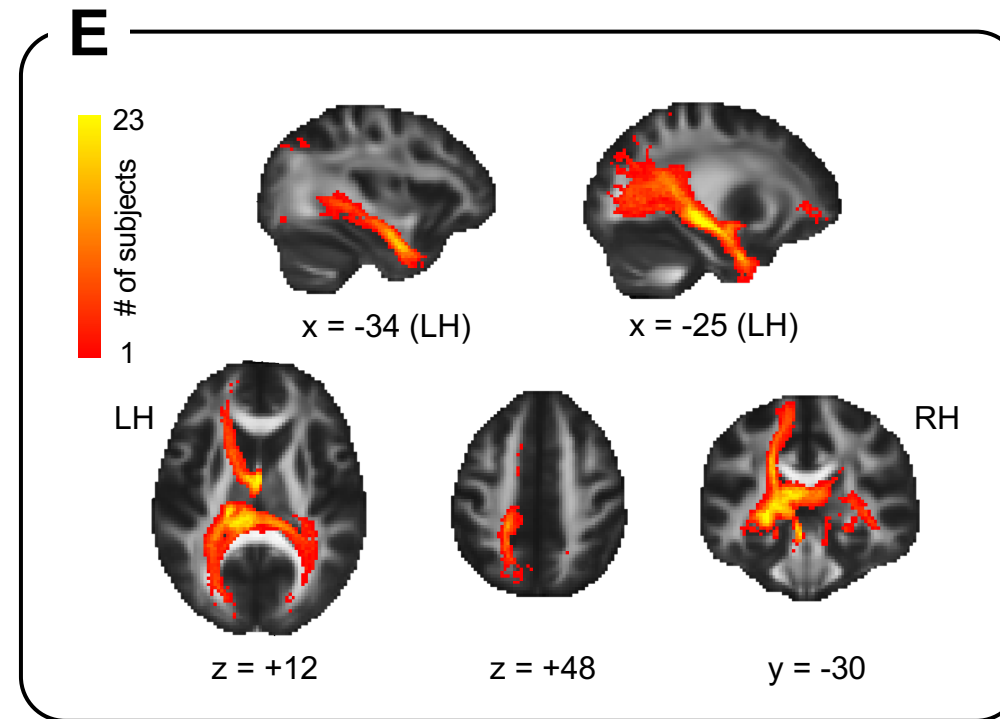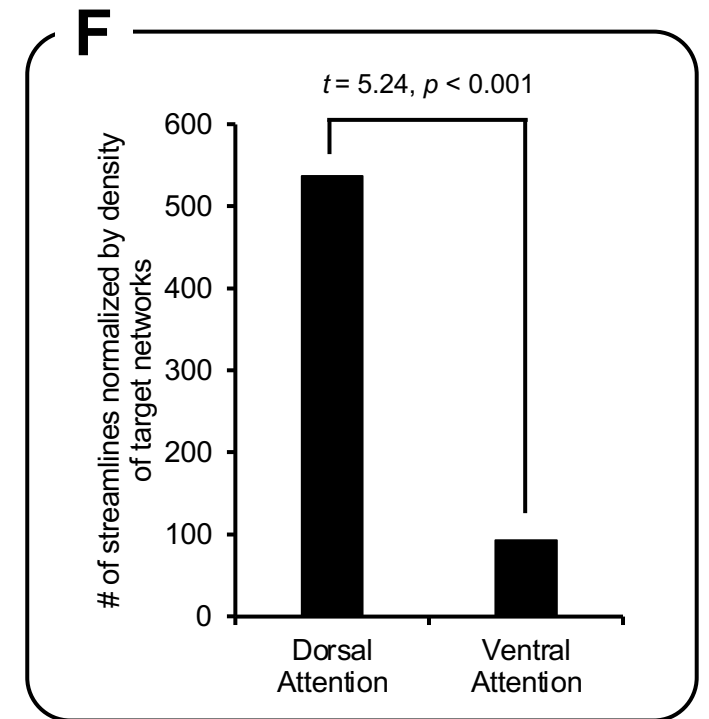

Source: http://biorxiv.org/content/10.1101/2020.05.20.105759v3.full.pdf
