RUNNING HEAD: THALAMUS LINKS PATERNAL AGE AND OFFSPRING'S READING

1 **Advanced paternal age effect on offspring's**  
2 **reading ability: The mediating role of**  
3 **thalamic maturation**

4 Zhichao Xia <sup>a, b, c#</sup>, Cheng Wang <sup>a#</sup>, Roeland Hancock <sup>d</sup>, Maaïke Vandermosten <sup>e</sup>,  
5 Fumiko Hoeft <sup>a, d f, g, h, i \*</sup>

6 # These authors contributed equally to this work.

7 \* Corresponding Author: Fumiko Hoeft, BIRC, University of Connecticut, 850 Bolton  
8 Rd #1271, Storrs, CT 06269; E-mails: [fumiko.hoeft@uconn.edu](mailto:fumiko.hoeft@uconn.edu).

---

<sup>a</sup> Department of Psychiatry and Weill Institute for Neurosciences, University of California, San Francisco (UCSF), USA

<sup>b</sup> State Key Laboratory of Cognitive Neuroscience and Learning & IDG/McGovern Institute for Brain Research, Beijing Normal University, China

<sup>c</sup> Center for Collaboration and Innovation in Brain and Learning Sciences, Beijing Normal University, China

<sup>d</sup> Department of Psychological Sciences and Brain Imaging Center (BIRC), University of Connecticut, USA

<sup>e</sup> Experimental ORL, Department of Neuroscience, KU Leuven, Belgium

<sup>f</sup> MultiUniversity Precision Learning Center, University of California, USA

<sup>g</sup> Dyslexia Center, UCSF, USA

<sup>h</sup> Haskins Laboratories, USA

<sup>i</sup> Department of Neuropsychiatry, Keio University School of Medicine, Japan

RUNNING HEAD: THALAMUS LINKS PATERNAL AGE AND OFFSPRING'S READING

9 **Abstract**

10 While advanced paternal age (APA) has repeatedly been associated with higher risk  
11 for neuropsychiatric disorders, its effects on cognitive processes such as reading  
12 have received minimal attention. Therefore, we examined the relationship between  
13 APA, offspring's reading abilities, and brain measures in a longitudinal  
14 neuroimaging study following 51 children from kindergarten through third grade.  
15 APA significantly predicted reduced reading performance, independent of parental  
16 reading history, socioeconomic status, home literacy environment, and birth order.  
17 This effect was mediated by gray matter volume change in the left posterior  
18 thalamus, predominantly the pulvinar nuclei. Complementary analyses using  
19 diffusion imaging data, Neurosynth, and 1000 Functional Connectome data  
20 indicated the APA-related cluster links to the dorsal attention network. These  
21 findings provide novel insights into the neurocognitive mechanisms underlying APA  
22 effect on reading during its earliest phase of reading acquisition and suggest future  
23 avenues of research on APA-related factors, such as *de novo* mutation, in reading.

24 **Keywords:** Advanced paternal age, brain maturation, diffusion tractography,  
25 dyslexia, longitudinal, pulvinar nuclei, reading, thalamus, dorsal attention network,  
26 voxel-based morphometry

27 **Abbreviations:** APA, advanced paternal age at childbirth; ARHQ, Adult Reading  
28 History Questionnaire; DAN, dorsal attention network; DNA, deoxyribonucleic acid;  
29 FDR, false discovery rate; FWE, family wise error; MatAGE, maternal age at

RUNNING HEAD: THALAMUS LINKS PATERNAL AGE AND OFFSPRING'S READING

30 childbirth; MNI, Montreal Neurological Institute; MRI, magnetic resonance imaging;  
31 PA, phonological awareness; PatAGE, paternal age at childbirth; pIQ, performance  
32 intelligence quotient; RAN, rapid automatic naming; RD, reading disorder; READ,  
33 reading composite score; ROI, region-of-interest; RSFC, resting-state functional  
34 connectivity; SES, socioeconomical status;  $t1$ , time-point 1;  $t2$ , time-point 2; TIV,  
35 total intracranial volume; V5/MT, middle temporal visual area; VAN, ventral  
36 attention network; VBM, voxel-based morphometry

37

## 38 **Introduction**

39 There has been a global trend of postponed childbearing, especially in developed  
40 countries, primarily owing to changing patterns of education, employment and  
41 marriage (Bray, Gunnell, & Smith, 2006; Khandwala, Zhang, Lu, & Eisenberg, 2017;  
42 Malaspina, Gilman, & Kranz, 2015). Mounting evidence reveals that advanced  
43 paternal age at childbirth (APA) increases risk for a wide range of neuropsychiatric  
44 conditions in offspring, such as intellectual disability, schizophrenia, autism  
45 spectrum disorder, and obsessive-compulsive disorder (Chudal, Leivonen, Rintala,  
46 Hinkka-Yli-Salomaki, & Sourander, 2017; D'Onofrio et al., 2014; Reichenberg et al.,  
47 2006; Sartorius & Nieschlag, 2010; Weiser et al., 2008).

48 In comparison to mental health, there is a paucity of research on the  
49 influence of APA on offspring's academic skills such as reading, which are essential  
50 for success in the modern society. A pioneering study in 1978 reported a negatively  
51 skewed distribution of paternal age at childbirth in a group of forty-eight boys with  
52 developmental dyslexia (Jayasekara & Street, 1978). After a thirty-year-long silence  
53 on the topic, Saha et al. (2009) demonstrated a negative effect of APA on six  
54 neurocognitive assessments including reading in children at age seven. The effect  
55 remained significant after controlling for maternal age, child's gestational age,  
56 gender and race (Saha et al., 2009). However, re-analysis of the same dataset  
57 questioned the conclusion. Edwards and colleagues found that familial  
58 characteristics such as maternal education and family size may account for the

RUNNING HEAD: THALAMUS LINKS PATERNAL AGE AND OFFSPRING'S READING

59 negative APA effect on their child's cognitive measures since the effect was no  
60 longer significant after controlling for these factors (Edwards & Roff, 2010),  
61 highlighting the need to consider environmental factors in further studies.

62 Besides this effect of APA on offspring's academic abilities remaining an open  
63 question, no studies until now have explored potential underlying mechanisms.  
64 Nascent research in other fields however has offered some clues at the molecular  
65 level. For example, males of advanced age have increased number of cell divisions of  
66 the gametes as opposed to females of the same age (approximately 38-fold at the age  
67 of 50), leading to a greater rate of paternal *de novo* mutations<sup>a</sup> that doubles every  
68 16.5 years (Crow, 2000). In a genome-wide analysis that examined the parental  
69 origin of *de novo* mutations in Icelandic triads, father's age explained nearly all the  
70 variance in the *de novo* mutation counts (Kong et al., 2012). In a separate line of  
71 research, *de novo* mutations have been associated with negative mental health  
72 outcomes such as higher prevalence of developmental disorders (Deciphering  
73 Developmental Disorders Study, 2017; Eising et al., 2018; Kim et al., 2017; O'Roak  
74 et al., 2011; O'Roak et al., 2012; Sanders et al., 2015; Turner et al., 2017; Wilfert,  
75 Sulovari, Turner, Coe, & Eichler, 2017). Taken together, it is conceivable that *de*  
76 *nov* mutations at least partially mediate the negative effect of APA on offspring's

---

<sup>a</sup> *de novo* mutation is an alteration in a gene that is present for the first time in one family member as the result of a mutation in a germ cell (egg or sperm) of one of the parents or in the fertilized egg itself (<https://ghr.nlm.nih.gov/primer/mutationsanddisorders/genemutation>).

RUNNING HEAD: THALAMUS LINKS PATERNAL AGE AND OFFSPRING'S READING

77 mental health, and this offers a plausible explanation of the potential APA effects  
78 on children's academic abilities such as reading (Mascheretti et al., 2017).

79         On the behavioral level, it would be extremely informative to understand  
80 whether and how the APA effect is mediated by cognitive-linguistic skills, but this  
81 question has never been asked before. Given that *de novo* mutation is most likely to  
82 be the molecular mechanism underlying the APA effect, factors playing a mediating  
83 role would be heritable but not necessarily inherited traits. Studies on reading have  
84 examined phonological processing most extensively, and found it to be influenced by  
85 genetics, environment, as well as brain anomalies (Mascheretti et al., 2014; Mirman  
86 et al., 2015; Petrill, Deater-Deckard, Thompson, DeThorne, & Schatschneider, 2006),  
87 making it a candidate trait to be testified. Specifically, phonological awareness (PA)  
88 and rapid automatized naming (RAN), the most critical processes in reading  
89 acquisition, is of particular interest to the current study (Hulme, Snowling,  
90 Caravolas, & Carroll, 2005; van Bergen, Bishop, van Zuijen, & de Jong, 2015). At  
91 the brain level, despite emerging evidence suggesting that neural processes  
92 measured by neuroimaging techniques (e.g., magnetic resonance imaging; MRI)  
93 may serve as mediators between genetic etiology and behavioral outcome thereby  
94 acting as endophenotypes, such approaches have yet to be utilized in the  
95 examination of APA effects on neuropsychiatric disorders and neuro-cognitive skills  
96 (e.g., Bas-Hoogendam et al., 2016; Spencer et al., 2012).

97         Therefore, we aimed to close the gap in the literature by: (1) examining the  
98 relationship between APA and offspring's reading abilities while controlling for a

RUNNING HEAD: THALAMUS LINKS PATERNAL AGE AND OFFSPRING'S READING

99 number of factors that potentially impact APA and/or offspring's reading in a  
100 systematic way; (2) exploring the role of previously known reading precursors and  
101 neuroanatomy in the relationship between APA and reading; and (3) understanding  
102 the neurofunctional significance of the findings by utilizing atlases and public  
103 datasets as well as by conducting complementary multimodal imaging analyses. To  
104 accomplish these goals, we examined behavioral and neuroimaging data both cross-  
105 sectionally and longitudinally in a study following 51 children from kindergarten  
106 through third grade.

## 107 **Results**

### 108 **APA is associated with poor reading above and beyond commonly known** 109 **predictors**

110 The distribution of paternal age at childbirth (PatAGE; *Mean* = 36.12 years, *SD* =  
111 4.91; Table S1) is presented in Figure 1A. Simple correlation analyses revealed that  
112 as expected, PatAGE was significantly and positively correlated with maternal age  
113 (MatAGE;  $r = 0.63$ ,  $p < 0.001$ ; Table S2). PatAGE was positively correlated with  
114 maternal history of reading difficulty, measured by Adult Reading History  
115 Questionnaire (MatARHQ;  $r = 0.34$ ,  $p = 0.028$ ), i.e., older age of fathers was  
116 correlated with poorer reading history of mothers. On the contrary, there was no  
117 significant correlation between PatAGE and paternal history of reading difficulty ( $r$   
118 =  $-0.011$ ,  $p > 0.1$ ). Importantly, we found greater PatAGE significantly correlated  
119 with lower reading composite scores in offspring at third grade (time-point 2;

RUNNING HEAD: THALAMUS LINKS PATERNAL AGE AND OFFSPRING'S READING

120  $t2$ READ;  $r = -0.39$ ,  $p = 0.011$ ). No significant correlations were found at either time-  
121 point between PatAGE and cognitive-linguistic skills typically found to be  
122 predictors of later reading ability, such as PA and RAN ( $p$ 's  $> 0.1$  for time-point 1  
123 PA composite score at kindergarten [ $t1$ PA], RAN composite score [ $t1$ RAN],  $t2$ PA,  
124 and  $t2$ RAN). In accordance with prior literature on factors that predict reading  
125 outcomes, poorer  $t2$ READ was predicted by poorer cognitive-linguistic skills at time-  
126 point 1 ( $t1$ PA:  $r = 0.46$ ,  $p = 0.002$ ;  $t1$ RAN:  $r = 0.31$ ;  $p = 0.041$ ), greater MatARHQ ( $r$   
127  $= -0.46$ ,  $p = 0.002$ ), and poorer home literacy environment measured by Home  
128 Observation Measurement of the Environment (HOME:  $r = 0.31$ ,  $p = 0.047$ ) (Segers,  
129 Damhuis, van de Sande, & Verhoeven, 2016; Thompson et al., 2015; van Bergen et  
130 al., 2015). Furthermore, MatAGE was negatively correlated with  $t2$ READ ( $r = -0.33$ ,  
131  $p = 0.031$ ), similar to PatAGE.

132 To examine whether the APA effect on reading existed above and beyond  
133 commonly identified confounds and additional variables known to influence reading  
134 acquisition, hierarchical multiple linear regressions were conducted with  $t2$ READ  
135 as the dependent variable in a systematic and hypothesis-driven fashion. In the  
136 first model, before PatAGE was entered in the second step, confounding factors  
137 related to the child were entered as predictors in the first step, including  $t2$  age,  
138 gender, handedness and the mean average of performance intelligence quotient  
139 (pIQ) at the two time-points (to produce more stable estimates of pIQ; measured by  
140 Concept Formation sub-test from Woodcock-Johnson III Test of Cognitive Abilities).  
141 We found that the PatAGE effect remained significant, explaining 14.9% of



RUNNING HEAD: THALAMUS LINKS PATERNAL AGE AND OFFSPRING'S READING

142 additional variance ( $\Delta R^2 = 0.149$ ,  $t = -3.115$ ,  $p = 0.004$ ; Model 1 in Table 1). In the  
143 second model, while the variables in the first step stayed the same, familial  
144 measures were entered in the second step, including maternal age, socioeconomic  
145 status (SES), maternal reading history and paternal reading history, before  
146 PatAGE was entered in the third step. As the results showed, PatAGE still  
147 explained an additional 9.5% of the variance in reading outcomes ( $\Delta R^2 = 0.095$ ,  $t = -$   
148  $2.42$ ,  $p = 0.024$ ; Model 2 in Table 1). Thus far, we demonstrated the APA effect on  
149 reading was not accounted for by confounds related to child or family. In the third  
150 model, we went on to investigate its relationship with early cognitive-linguistic  
151 skills. With the first two steps remained the same as the second model, we entered  
152  $t1$  cognitive-linguistic skills (i.e.,  $t1PA$  and  $t1RAN$ ) in the third step before entering  
153 PatAGE in the fourth step, and the APA effect on offspring's reading was still above  
154 and beyond that of these cognitive-linguistic variables, explaining an additional 7.3%  
155 of the variance ( $\Delta R^2 = 0.073$ ;  $t = -2.42$ ,  $p = 0.024$ ; Model 3 in Table 1). Furthermore,  
156 in accord with the prior literature,  $t1PA$  and  $t1RAN$  again significantly accounted  
157 for  $t2READ$  variance in the final model ( $\Delta R^2 = 0.138$ ;  $t1PA$ :  $t = 2.83$ ,  $p = 0.010$ ;  
158  $t1RAN$ :  $t = 2.14$ ,  $p = 0.043$ ). In other words, the contributions from PatAGE and  
159 cognitive-linguistic precursors were relatively independent.

160 **APA is associated with neuroanatomical maturation in the left thalamus**

161 We examined the relationship between PatAGE and global measures of  
162 neuroanatomy, i.e., total intracranial volume (TIV) at  $t1$  and  $t2$ , as well as change of  
163 TIV ( $\Delta TIV$ , i.e.,  $t2TIV - t1TIV$ ) between the two time-points, before examining the

RUNNING HEAD: THALAMUS LINKS PATERNAL AGE AND OFFSPRING'S READING

164 relationship between APA and regional brain morphometry. No significant  
165 correlations were observed (all  $p$ 's > 0.1). Further, whole brain analyses of regional  
166 gray matter volume (GMV) at either time-point showed no significant clusters at  $p$   
167 < 0.05 corrected for Family Wise Error (FWE). Lastly, we examined the APA effect  
168 on regional GMV change ( $\Delta$ GMV, i.e.,  $t_2$ GMV- $t_1$ GMV) while controlling for  $t_1$ TIV  
169 and  $\Delta$ TIV. Results revealed a significantly positive correlation between PatAGE and  
170  $\Delta$ GMV in a cluster covering the left posterior thalamus (hereafter APA-cluster;  $p =$   
171 0.017, FWE corrected, 819 voxels, peak MNI coordinate [-27, -30, 6]; Figure 2A).  
172 Specifically, greater paternal age was associated with less GMV decrease in this  
173 cohort (Figure 2B). To verify that this APA effect was not due to confounding  
174 variables, hierarchical multiple regression analyses were performed. In the first  
175 model, after regressing out nuisance variables commonly controlled in longitudinal  
176 VBM studies ( $t_1$  age, time interval between  $t_1$  and  $t_2$ , gender, handedness, average  
177 pIQ of  $t_1$  and  $t_2$ ,  $t_1$ TIV and  $\Delta$ TIV), PatAGE still explained 34.6% of the variance in  
178 average  $\Delta$ GMV of the APA-cluster ( $t = 4.59$ ,  $p < 0.001$ ). Since MatARHQ and  
179 MatAGE were significantly correlated with PatAGE, we additionally regressed  
180 them out in the second model. We found that PatAGE still explained 19.0% of the  
181 variance in average  $\Delta$ GMV of the APA-cluster ( $t = 3.28$ ,  $p = 0.003$ ).

182 **APA effect on offspring's reading is mediated by  $\Delta$ GMV in the left posterior**  
183 **thalamus**

184 To further examine whether  $\Delta$ GMV in the APA-cluster was correlated with reading,  
185 we performed voxel-wise regression within this cluster while controlling for  $t_1$ TIV

RUNNING HEAD: THALAMUS LINKS PATERNAL AGE AND OFFSPRING'S READING

186 and  $\Delta$ TIV. As shown in Figure 2, there was a negative correlation between  $\Delta$ GMV  
187 and  $t2$ READ in a sub-region of the APA-cluster ( $p$ -cluster = 0.037, small volume  
188 FWE corrected, 86 voxels, peak MNI coordinate [-27, -31, 10]), indicating that the  
189 poorer the reading skill, the less the thalamic GMV decrease between the two time-  
190 points. Hierarchical multiple regression analyses were performed to verify the  
191 result. We found that  $\Delta$ GMV of the significant cluster explained 19.7% of variance  
192 in  $t2$ READ after regressing out nuisance variables ( $t2$  age, gender, handedness,  
193 average pIQ,  $t1$ TIV and  $\Delta$ TIV) in the first step ( $t = -3.20$ ,  $p = 0.003$ ). Since  $t2$ READ  
194 was also significantly correlated with the two cognitive-linguistic skills  $t1$ PA and  
195  $t1$ RAN, we examined whether the observed effect was above and beyond cognitive-  
196 linguistic skills by entering these two measures in the second step. The results  
197 showed that  $\Delta$ GMV additionally explained 19.9% of the variance in  $t2$ READ ( $t = -$   
198 3.66,  $p = 0.001$ ).

199         Given that  $\Delta$ GMV in the left thalamic sub-region was significantly associated  
200 with both PatAGE and  $t2$ READ, one possibility is that  $\Delta$ GMV mediates the APA  
201 effect on offspring's reading. To test this hypothesis, we ran mediation analysis and  
202 observed a significant mediation effect. The 95% confidence interval was [-0.522 -  
203 0.041] when not controlling for age at  $t2$ , gender, handedness, average of  $t1$  and  $t2$   
204 pIQ, TIV at  $t1$ , TIV change from  $t1$  to  $t2$ ,  $t1$ PA, and  $t1$ RAN; the 95% confidence  
205 interval was [-0.552 -0.043] when these covariates were controlled (Figure 3). In  
206 supplementary materials, this result was discussed in relation to an additional  
207 finding that early PA skills mediated the effect of maternal reading history on

RUNNING HEAD: THALAMUS LINKS PATERNAL AGE AND OFFSPRING'S READING

208 reading outcome (95% confidential interval was [-0.303 -0.022] when not controlling  
209 for age at  $t_2$ , handedness, average of  $t_1$  and  $t_2$  pIQ, and  $t_1$ IRAN, and changed to [-  
210 0.249 -0.001] when these covariates were controlled; Figure S1).

211 **The APA-cluster is localized in the pulvinar nuclei and highly linked to the**  
212 **dorsal attention network**

213 To understand the neurostructural profile of the APA-cluster in the left thalamus,  
214 we compared the cluster with a histological atlas and a connectivity atlas. The  
215 result revealed that 548 out of 819 voxels in the APA-cluster overlapped with the  
216 human thalamus of the Morel histological atlas (Jakab, Blanc, Berényi, & Székely,  
217 2012; Krauth et al., 2010), while the remaining 271 voxels could not be labeled,  
218 possibly because the APA-cluster also contained white matter. As presented in  
219 Figure 4A, within the overlapping region, 380 voxels (69.5%) were in the  
220 subdivision labeled as pulvinar nuclei, especially the medial portion, which is  
221 known to have widespread connections with the inferior parietal lobule (Arcaro,  
222 Pinsk, & Kastner, 2015). These results were further corroborated by examining the  
223 Thalamic Connectivity Probability Atlas  
224 (<http://fsl.fmrib.ox.ac.uk/fsl/fslview/atlas.html>), where we found that the APA-  
225 cluster was most likely localized in the subdivision that was connected to the  
226 posterior parietal cortex, with a probability of 38.9% (Figure 4B).

227 We next examined functional connectivity of the APA-cluster by utilizing two  
228 approaches available in Neurosynth (v0.5; Yarkoni, Poldrack, Nichols, Van Essen,

RUNNING HEAD: THALAMUS LINKS PATERNAL AGE AND OFFSPRING'S READING

229 & Wager, 2011). These included generation of a meta-analytic map of regions that  
230 co-activate with the APA-cluster across more than 10,900 functional MRI (fMRI)  
231 studies, as well as a resting-state functional connectivity (RSFC) map from the  
232 APA-cluster using the 1000 Functional Connectome dataset (Biswal et al., 2010;  
233 Yeo et al., 2011). The co-activated areas included subcortical structures and cortical  
234 regions such as bilateral intraparietal sulci, inferior temporal gyrus, and frontal eye  
235 fields in the frontal cortex (Figure S2A). On the other hand, functional connectivity  
236 patterns showed similar but more widespread networks than the co-activation map  
237 (Figure S2B). A conjunction analysis revealed that bilateral frontal eye fields,  
238 intraparietal sulci, middle temporal visual area (V5/MT), and cerebellum were  
239 among the overlapped regions across the two approaches, in addition to subcortical  
240 structures (Figure 5A).

241 We then calculated Sørensen-Dice coefficient ( $s$ ) between the overlapping  
242 areas and previously identified functional networks during resting state (Yeo et al.,  
243 2011). The derived pattern of overlapping areas showed the greatest resemblance to  
244 the dorsal attention network (DAN;  $s = 0.360$ ; Figure 5B) and to the ventral  
245 attention network (VAN;  $s = 0.261$ ), much higher than its resemblance to other  
246 networks (visual network:  $s = 0.086$ ; somatomotor network:  $s = 0.071$ ; limbic  
247 network:  $s < 0.001$ ; frontoparietal network:  $s = 0.041$ ; and default network:  $s =$   
248  $0.005$ ). Together with the aforementioned findings utilizing structural atlases, these  
249 results using large-scale fMRI databases from functional neuroimaging studies

RUNNING HEAD: THALAMUS LINKS PATERNAL AGE AND OFFSPRING'S READING

250 point to the attention network, in particular the DAN, to be the candidate brain  
251 functional system associated with the APA-cluster in the left thalamus.

252 In the final step, we used diffusion imaging data available in a sub-group of  
253 23 participants to determine which was more likely the candidate. Using  
254 deterministic tractography, we reconstructed white matter fibers through the APA-  
255 cluster, covering inferior fronto-occipital fasciculus, corticospinal tract, forceps  
256 major, superior corona radiata, as well as anterior and posterior limbs of the  
257 internal capsule. Figure 6A shows reconstructed fibers in a representative child and  
258 Figure 6B shows intersection across participants, for demonstrative purposes. More  
259 importantly, the APA-cluster showed significantly stronger connectivity (defined by  
260 dividing the total number of streamlines by the size of the target network) with  
261 DAN than with VAN ( $t = 6.61$ ,  $p < 0.001$ ; Figure 6C). Finally, consistent with the  
262 aforementioned results, correlation analyses showed significant positive correlation  
263 between APA-DAN streamlines and PatAGE ( $r = 0.49$ ,  $p = 0.018$ ; Figure 6D), and  
264 significant negative correlation between APA-DAN streamlines and  $t2$ READ ( $r = -$   
265  $0.45$ ,  $p = 0.030$ ; Figure 6E). No significant correlations were found between APA-  
266 VAN streamlines and PatAGE or  $t2$ READ (both  $p$ 's  $> 0.1$ ).

## 267 Discussion

268 The present study provides evidence that APA is negatively associated with  
269 offspring's reading by rigorously controlling for a number of potential confounding  
270 factors and for the first time investigates neurocognitive mechanisms underlying

RUNNING HEAD: THALAMUS LINKS PATERNAL AGE AND OFFSPRING'S READING

271 the APA effect on reading by using multiple neuroimaging modalities and online  
272 databases/atlas. We showed that the APA effect on reading skills was  
273 independent of familial factors such as parental reading history, SES (an aggregate  
274 measure of family income, parental educational level and occupation), and home  
275 literacy environment. We also investigated the neurobiological correlates of APA,  
276 identifying it to be the grey matter development in the left thalamus. The  
277 association between paternal age and reading was mediated by morphometric  
278 changes of the left posterior thalamus when examined at the earliest stages of  
279 formal schooling from ages 5 to 8. With the aid of multimodal neuroimaging, we  
280 identified this region in the left thalamus as most relevant for dorsal attention  
281 network. These findings are in contrast to and complement the literature linking  
282 phonological and orthographic processing in reading to the left temporo-parietal and  
283 occipito-temporal regions. Furthermore, the mediation relationship revealed here  
284 was different from the mediating effect of phonological processing on the  
285 relationship between reading and maternal reading history, which has been  
286 attributed to hereditary effects (van Bergen et al., 2015). Together, we provided  
287 converging evidence that APA may be a risk factor that negatively impacts reading,  
288 independent of phonological processing, through an altered maturational process of  
289 the left thalamus.

290 **Potential mechanisms of APA effect on offspring's reading**

291 In this study, we demonstrated a negative APA effect on offspring's reading abilities.  
292 This finding is consistent with a study in boys with dyslexia (Jayasekara & Street,

RUNNING HEAD: THALAMUS LINKS PATERNAL AGE AND OFFSPRING'S READING

293 1978) and a more recent population-based study (Saha et al., 2009). As shown by  
294 Jayasekara and Street (1978), APA was associated with greater incidence of  
295 developmental dyslexia, independent of SES and birth order. While the former  
296 study was restricted to a small number of boys with dyslexia, Saha et al. (2009)  
297 extended the finding to a broader population. By conducting population-based  
298 analyses, the authors observed negative APA effects on several neurocognitive  
299 measures that included reading. The effects remained significant after controlling  
300 for confounding factors such as mother's age, SES, and parental psychiatric illness.  
301 It should be noted that the relationship was nonlinear, which might be caused by  
302 the fact that fathers of extreme young as well as old ages were included in their  
303 analyses (range of paternal age was from 14 to 66 years). When focusing on the  
304 range of paternal age examined in our study (i.e., 25-47 years), a linear decrease in  
305 reading scores with increasing paternal age was observed (Saha et al., 2009).  
306 However, the effect observed in the earlier studies could be confounded partially by  
307 familial characteristics. For example, Edwards and Roff (2010) found the APA effect  
308 on reading to be no longer significant after adjusting for confounding factors such as  
309 maternal education and family size, highlighting the need for more comprehensive  
310 and rigorous studies before deriving the conclusion that APA negatively affects  
311 reading. Against this background, we examined the negative APA effect on reading  
312 by additionally controlling for familial risk for dyslexia (parental reading history)  
313 (van Bergen et al., 2015), home literacy environment (Grigorenko, 2001; S.  
314 Mascheretti et al., 2013), and SES (composite of parents' educational level,



RUNNING HEAD: THALAMUS LINKS PATERNAL AGE AND OFFSPRING'S READING

315 occupation, and family income). Furthermore, we used a battery of measures to  
316 accurately assess children's reading abilities after three years of formal reading  
317 instruction. We also acquired cognitive-linguistic precursors of reading (i.e., PA,  
318 RAN, letter knowledge) of these children at the beginning of formal reading  
319 instruction in kindergarten, allowing us to examine reading development  
320 longitudinally. Our results first provide a unique picture of the negative APA effect  
321 on reading, after controlling for possible confounds. Moreover, although there is a  
322 possibility that fathers who are poorer reader may have children later because for  
323 example, they may take time to be financially independent and hence likely have  
324 poor reading children, it is not the case in the current study since we did not find a  
325 significant correlation between PatAGE and paternal ARHQ. This pattern further  
326 confirms the negative influence of APA on reading. Relevant to these findings, we  
327 did not observe associations between paternal age and cognitive-linguistic skills (i.e.,  
328 PA, RAN, letter knowledge) known to be strong predictors of early reading  
329 acquisition, suggesting that paternal age may impact reading through a different  
330 pathway (Hulme et al., 2005; Swagerman et al., 2017; van Bergen et al., 2015).

331 Mechanisms underlying these APA effects are likely to be complex, involving  
332 genetic, epigenetic and environmental factors. While the number of studies that  
333 examined the APA effect on reading is far too few to allow for a comprehensive  
334 interpretation, studies on other APA-linked neurodevelopmental disorders offer  
335 important insights into potential mechanisms. One predominant explanation is that  
336 APA exerts its effect on the risk of a given disorder through the accumulated *de*

RUNNING HEAD: THALAMUS LINKS PATERNAL AGE AND OFFSPRING'S READING

337 *novo* genetic mutations and epigenetic modifications (e.g., DNA methylation and  
338 repressive histone modification) in paternal gametes (Girard et al., 2016; Janecka et  
339 al., 2017; Kim et al., 2017; Perrin, Brown, & Malaspina, 2007). For example, men  
340 who delay fatherhood have an increased number of *de novo* mutations (e.g., *de novo*  
341 single nucleotide variations) in their sperms and this might proportionally increase  
342 the chance of their offspring to carry deleterious mutations that increase risks for  
343 certain neurodevelopmental disorders. In line with this explanation, both higher  
344 rate of *de novo* mutations and increased paternal age have been identified in  
345 individuals with psychiatric conditions including intellectual disability (Reijnders et  
346 al., 2016; Saha et al., 2009), autism (Frans et al., 2013; Sebat et al., 2007), attention  
347 deficit hyperactivity disorder (Kim et al., 2017) and schizophrenia (Awadalla et al.,  
348 2010; Malaspina et al., 2001; Singh et al., 2016). From another perspective,  
349 understanding of mechanisms underlying the APA effect can be deepened by  
350 identifying intermediate (endo)phenotypes, which can be observed at the behavioral  
351 level or via neuroimaging. In other words, APA may be associated with higher  
352 occurrence of neurodevelopmental disorders in offspring through increasing the risk  
353 for developing specific precursors of certain disorders (Cannon, 2009). For example,  
354 the likelihood of having impaired social functioning in an offspring, which is a core  
355 symptom of psychiatric disorders, increases with paternal age (Weiser et al., 2008).  
356 The two types of evidences are at different explanatory levels and corresponding  
357 evidences can be combined together to draw a more comprehensive picture.  
358 Although mechanisms underlying the APA effect are not fully understood, the risk

RUNNING HEAD: THALAMUS LINKS PATERNAL AGE AND OFFSPRING'S READING

359 for neurodevelopmental disorders is most likely multidimensional and involve  
360 multiple processes including both *de novo* mutations and inherited risks. Adding to  
361 prior research, findings of the current study offer insights into potential neural  
362 mechanisms at the macroscopic level. We discuss this point further in the following  
363 section.

364         The research on the role of genetics in reading development and disorder is  
365 growing. However, while most researchers have focused on examining heritability  
366 in twin studies or identifying risk genes for reading disorder (RD) by analyzing  
367 single nucleotide polymorphisms (Mascheretti et al., 2017), less attention has been  
368 paid to the role of spontaneous mutations and their sources (for exceptions, see  
369 Eising et al., 2018; Veerappa, Saldanha, Padakannaya, & Ramachandra, 2013).  
370 Based on our findings and studies of the molecular mechanisms of APA where *de*  
371 *novo* mutations were almost exclusively explained by APA (Kong et al., 2012), we  
372 propose that *de novo* mutations may be one mediator of APA effects on reading, and  
373 a potential risk factor for poor reading. Future research analyzing deoxyribonucleic  
374 acid (DNA) from triads exploring the relationship between *de novo* mutations and  
375 offspring's reading phenotypes is warranted. Of relevance, a recent study used  
376 whole-genome sequencing in parent-child trios and discovered *de novo* mutations  
377 that disrupted specific genes (e.g., *CHD3*, *SETD1A*, *WDR5*) in individuals with  
378 childhood apraxia of speech, another common neurodevelopmental disorder (Eising  
379 et al., 2018). Similar studies may be a promising approach to reading research.

RUNNING HEAD: THALAMUS LINKS PATERNAL AGE AND OFFSPRING'S READING

380 **The left posterior thalamus plays an intermediary role in the APA effect**  
381 **on offspring's reading**

382 The current study demonstrated a negative APA effect on offspring's reading after  
383 controlling potential confounding factors. It further revealed that this effect was  
384 mediated by morphometric maturation of the left posterior thalamus, providing a  
385 potential neural explanation at the macroscopic level.

386 The thalamus is an important relay center in the human brain, connecting  
387 cortical and subcortical areas, receiving information from sensory cortices and  
388 relaying it to higher-level association areas. Studies in normal populations with  
389 cross-sectional designs have produced a mixed picture of the normal developmental  
390 trajectory of the thalamus: while the relative gross volume of the thalamus  
391 (normalized by brain size) was found to decrease from 4 to 18 years of age by  
392 Sussman, Leung, Chakravarty, Lerch, and Taylor (2016), an opposite pattern has  
393 also been reported (Brain Development Cooperative, 2012). Such inconsistency  
394 could be caused by subnuclei-specific developmental trajectories. In a recent  
395 longitudinal study, Raznahan and colleagues demonstrated that while most  
396 thalamic nuclei showing age-related areal expansion, regions related to ventral  
397 anterior, rostral ventrolateral, and mediodorsal nuclei show contraction. The  
398 pulvinar did not show apparent correlations with age (Raznahan et al., 2014).  
399 Despite the insufficient evidence on typical thalamic maturation, there is no doubt  
400 that anomalous development of the thalamus can severely affect maturation of  
401 other cortical and subcortical brain regions (Ball et al., 2012), which may in turn

RUNNING HEAD: THALAMUS LINKS PATERNAL AGE AND OFFSPRING'S READING

402 impact higher level cognitive processes such as reading. In line with this view,  
403 structure (Brown et al., 2001; Galaburda & Eidelberg, 1982; Giraldo-Chica, Hegarty,  
404 & Schneider, 2015), activation (Brunswick, McCrory, Price, Frith, & Frith, 1999;  
405 Diaz, Hintz, Kiebel, & von Kriegstein, 2012; Maisog, Einbinder, Flowers,  
406 Turkeltaub, & Eden, 2008; Preston et al., 2010; Pugh et al., 2013), and connectivity  
407 (Davis et al., 2010; Fan, Davis, Anderson, & Cutting, 2014; Lebel et al., 2013) of the  
408 thalamus have been demonstrated to be associated with individual differences in  
409 reading performance (see Goswami, 2015 for a review). In the current study, the  
410 volumetric change in the posterior thalamus from ages 5-8 was significantly  
411 associated with paternal age. While children with relatively younger fathers showed  
412 GMV decrease in the APA-cluster from 5 to 8 years of age, those with older fathers  
413 showed less decrease or even an increase. This pattern suggested that APA altered  
414 developmental trajectory of this subcortical structure.

415       Moreover, comparing the APA-cluster with the Morel atlas revealed that the  
416 maximal overlap was in the left pulvinar, which plays an integral role in the  
417 functioning of the visual cortex (Bridge, Leopold, & Bourne, 2016; Purushothaman,  
418 Marion, Li, & Casagrande, 2012). This structure is an integral region for visual  
419 processes including visuo-spatial attention (Fischer & Whitney, 2012), motion  
420 perception (Shimono, Mano, & Niki, 2012), and visuo-motor transformations (Arend  
421 et al., 2008; Shipp, 2004). A recent meta-analytic study on task-based fMRI  
422 demonstrated a close relationship between pulvinar and attentional control (Barron,  
423 Eickhoff, Clos, & Fox, 2015), which was further supported by another fMRI study

RUNNING HEAD: THALAMUS LINKS PATERNAL AGE AND OFFSPRING'S READING

424 examining the interaction between three major components of attention (altering,  
425 orienting, and executive control) (Xuan et al., 2016). The pulvinar is also involved in  
426 writing, which is related to reading and imposes a high demand of visuo-spatial  
427 attention among other processes (Yuan & Brown, 2015). Consistent with this line of  
428 literature, our results from a deterministic tractography-based thalamo-cortical  
429 connectivity atlas showed that this region was most likely connected with posterior  
430 parietal areas. Public RSFC and co-activation maps also revealed connections  
431 between the APA-cluster and key nodes (e.g., frontal and parietal eye fields) in the  
432 attention networks, especially the DAN (Corbetta, Patel, & Shulman, 2008).  
433 Additionally, the pulvinar connects to visual motion-sensitive cortices (V5/MT)  
434 (Shimono et al., 2012), further indicating that the APA-cluster may be associated  
435 with processes related to visuo-spatial attention (Amso & Scerif, 2015; Wu et al.,  
436 2015; Wu et al., 2016). The anatomical connectivity between the APA cluster and  
437 DAN was confirmed by analyses of white matter diffusion data available in a subset  
438 of our sample. Specifically, the APA-cluster showed greater connectivity to DAN  
439 than to VAN, and only the connectivity between the APA-cluster and DAN was  
440 correlated with both paternal age and children's reading performance. Together,  
441 these findings indicate that the pulvinar and brain networks underlying visuo-  
442 spatial attention are parsimonious neurocognitive mechanisms impacted by APA,  
443 and their atypical pattern and development may further impede reading acquisition.

444 To date, research into the APA effect on neural networks and cognitive  
445 processes is scarce. The study conducted by Shaw and colleagues focused on

## RUNNING HEAD: THALAMUS LINKS PATERNAL AGE AND OFFSPRING'S READING

446 parental age effects on cortical thickness and surface area but did not examine their  
447 relationship to cognitive functions, making this study somewhat inconclusive as to  
448 the role of parental age on neurocognitive processes (Shaw et al., 2012). Taking one  
449 step further, our study revealed an intermediary between paternal age and a  
450 specific behavioral phenotype at the neural level, offering initial insights into the  
451 complex mechanisms underlying APA effects.

### 452 **APA as a risk factor for poor reading**

453 Our findings of the APA effect on offspring's reading also offer insights into  
454 the etiologies of RD. Overall, 7% of school-aged children develop RD, characterized  
455 by unexpected problems in reading and spelling (Peterson & Pennington, 2012).  
456 Although RD has been demonstrated to be heritable (Grigorenko, 2004; Hawke,  
457 Wadsworth, & DeFries, 2006), the etiologies are complex and remain largely  
458 unknown (Poelmans, Buitelaar, Pauls, & Franke, 2011). For a deeper and more  
459 comprehensive understanding, it is essential to examine multiple components of  
460 reading and the underlying neural circuitries systematically (Wandell & Le, 2017).  
461 Genetic risk has been proposed to impair brain networks underlying auditory and  
462 phonological processing, consequently impeding on individual's reading  
463 development (Giraud & Ramus, 2013). But here we demonstrate a unique APA  
464 effect on offspring's reading abilities, independent of parental reading history that  
465 is considered to be associated with inherited genetic risk for developing RD (Figure  
466 7) (Hulme et al., 2005; Swagerman et al., 2017; van Bergen et al., 2015).  
467 Additionally, this effect appeared to be independent of environmental risks such as

RUNNING HEAD: THALAMUS LINKS PATERNAL AGE AND OFFSPRING'S READING

468 SES and home literacy environment. Our findings are thus in line with an emerging  
469 view that RD is associated with accumulative risk from genetics, environments, and  
470 their interactions (Bishop, 2015) in both children and adults with RD (Olulade,  
471 Napoliello, & Eden, 2013; Shaywitz & Shaywitz, 2008).

472       The relationship between visuo-spatial attention and reading has been  
473 demonstrated consistently and repeatedly by several lines of research. Specifically,  
474 impaired visuo-spatial processing has been shown to negatively impact reading  
475 acquisition by affecting one's ability to focus their attention on target symbol-sound  
476 correspondences and/or to suppress non-targets (Franceschini, Gori, Ruffino,  
477 Pedrolli, & Facoetti, 2012; Shaywitz & Shaywitz, 2008; Vidyasagar & Pammer,  
478 2010). For example, selective visual attention has been associated with acquisition  
479 of orthographic knowledge (Bosse, 2015; Stevens & Bavelier, 2012) and decoding  
480 skill (Matthews & Martin, 2015). Besides, both adults and children with RD show  
481 visuo-spatial attention deficits such as having lower visuo-spatial span capacities  
482 and being slower in a visuo-spatial attention-orienting task (Abbott, Larkin, &  
483 Dunn, 2015; Bosse, Tainturier, & Valdois, 2007; Judy Buchholz & Davies, 2005; J.  
484 Buchholz & Davies, 2008; A. Facoetti, Paganoni, Turatto, Marzola, & Mascetti, 2000;  
485 Andrea Facoetti et al., 2006; Roach & Hogben, 2004; Ruffino, Gori, Boccardi,  
486 Molteni, & Facoetti, 2014). Third, longitudinal research has demonstrated that  
487 impaired visuo-spatial processing in pre-reading kindergarteners is an important  
488 risk factor for future reading difficulties (Franceschini et al., 2012; Gori & Facoetti,  
489 2015).



RUNNING HEAD: THALAMUS LINKS PATERNAL AGE AND OFFSPRING'S READING

490           The causal role of impaired visuo-spatial attention in reading difficulty is  
491 however, under debate (Gori & Facoetti, 2015; Joo, Donnelly, & Yeatman, 2017;  
492 Olulade et al., 2013; Vidyasagar & Pammer, 2010). While behavioral evidence  
493 supports a causal role of visual deficits in RD (Gori & Facoetti, 2015), Olulade and  
494 colleagues found that hypoactivation in motion perception related V5/MT in RD  
495 existed only when compared with age-matched but not with reading-matched  
496 controls, suggesting that this anomaly is driven by impoverished reading experience  
497 rather than causally related to RD (Olulade et al., 2013). Given the high association  
498 between APA and *de novo* mutations, our research may shed light on this debate  
499 favoring the causal effect of visuo-spatial attention on reading ability. In particular,  
500 our results suggest that APA might contribute to lower reading performance via  
501 impacting the developmental trajectory of a sub-region of the left thalamus, which  
502 connected with dorsal and ventral attentional networks that are important for  
503 typical reading development (Da Silva, Ueki, Oliveira, Boggio, & Macedo, 2016).  
504 Moreover, integrity of structural connectivity between the APA-related thalamic  
505 area with the DAN was significantly correlated with APA as well as reading ability.  
506 These results collectively support a possible pathway from APA (possibly via genetic  
507 variations), through neurocognitive endophenotypes (left thalamus, possibly related  
508 to visuo-spatial attention), to downstream effects on behavior (reading).

509           It should be noted that our findings do not exclude the possibility that  
510 reading experience could also shape visual attention and corresponding neural  
511 circuits (Skeide et al., 2017). Neither does this study deny the essential role of

RUNNING HEAD: THALAMUS LINKS PATERNAL AGE AND OFFSPRING'S READING

512 phonological processing in reading development. Instead, our results supported its  
513 significance by showing a significant contribution of cognitive-linguistic precursors  
514 (PA, letter knowledge, and rapid naming) in addition to APA effect in reading  
515 outcomes. Reading is multi-faceted, and dysfunction in any requisite cognitive  
516 process could increase the risk of reading difficulties in a probabilistic way (Carroll,  
517 Solity, & Shapiro, 2015; Peterson & Pennington, 2012). Correspondingly, it is now  
518 widely accepted that RD is an outcome of multiple factors/deficits and the complex  
519 interplay among them (Mascheretti et al., 2013; Pennington, 2006). Such Multiple  
520 Deficit Model of RD has recently been expanded by introducing parental influences  
521 through genetic and cultural transmission known as the Intergenerational Multiple  
522 Deficit Model (van Bergen, van der Leij, & de Jong, 2014). Based on our findings, we  
523 propose that variables beyond parental genotypes and behavioral phenotypes, such  
524 as intermediate neural measures and *de novo* mutation due to APA, should be  
525 added to achieve a more comprehensive understanding of the parental influence on  
526 offspring's reading.

527 **Limitations**

528 In the present study, we found a negative effect of APA on offspring's reading  
529 achievement. However, the results should be interpreted with cautions. First,  
530 because the range of paternal age at the time of child's birth in this study was  
531 restricted to 25-47 years, the findings may not necessarily be extended to children  
532 with fathers on extreme ends, young or old. Of relevance, young fatherhood has also  
533 been associated with adverse cognitive development of the offspring (Weiser et al.,

RUNNING HEAD: THALAMUS LINKS PATERNAL AGE AND OFFSPRING'S READING

534 2008) but possibly due to different factors such as immature sperm and economic  
535 disadvantages (Chen et al., 2008). Second, because children's reading abilities were  
536 measured at grade 3, it is unknown whether the APA effect on reading will persist  
537 into adulthood or is simply a developmental delay. Third, since reading performance  
538 of the participants were within typical range, our results show that individual  
539 differences in reading ability are associated with age of the fathers, rather than  
540 direct evidence that late fatherhood is associated with RD in their offspring. Finally,  
541 while we revealed the left posterior thalamus mediated the APA effect on reading,  
542 we could not answer why APA (or *de novo* mutations) specifically impacts this  
543 subcortical area. Given that the typical maturation of thalamus can be also affected  
544 by prenatal and postnatal factors such as preterm birth (Ball et al., 2012), questions  
545 such as how APA influences maturation of thalamus and relevant functional  
546 systems, together with other factors, require further elaboration.

547 **Conclusion**

548 The current study, for the first time, examined the association between APA and  
549 reading at both a behavioral and neurobiological level. We provided evidence that  
550 APA is an independent factor associated with lower reading ability. We also found  
551 that the APA effect on reading was mediated by maturation of the thalamus. This  
552 suggests a novel neurobiological pathway for intergenerational influence on reading,  
553 completing prior findings that offspring's reading is influenced by parental reading  
554 via (offspring's) phonological skills (van Bergen et al., 2015; Vandermosten, Cuyenen,  
555 Vanderauwera, Wouters, & Ghesquiere, 2017). Based on these evidences we argued

RUNNING HEAD: THALAMUS LINKS PATERNAL AGE AND OFFSPRING'S READING

556 that APA should be regarded as one significant risk factor for children's literacy  
557 development, and be taken into consideration in the examination of the etiology of  
558 RD. To replicate these findings and advance our understanding of this APA effect  
559 on reading, future studies are warranted where a more comprehensive battery of  
560 behavioral tests that includes visuo-spatial and attentional processes,  
561 corresponding neural measures, and molecular approaches that measure the  
562 number and origins of *de novo* mutations (trio-based whole-genome/exome  
563 sequencing; Jin et al., 2017), are included. We also hope this study will stimulate  
564 future research aiming to address different sources of genetic variations associated  
565 with reading development to understand the interplay between genetics and other  
566 factors that impact reading development (Pennington, 2006; van Bergen et al.,  
567 2014). In particular, further studies could adopt advanced research designs such as  
568 intergenerational neuroimaging approach to gain in-depth knowledge on how  
569 multiple factors (e.g., paternal age, familial risk, home literacy environment) affect  
570 the development of offspring's reading and the corresponding networks interactively  
571 from preliteracy to mature stages of reading (Ho, Sanders, Gotlib, & Hoeft, 2016;  
572 Hoeft & Hancock, 2017).

573 **Methods**

574 **Participants**

575 Participants were drawn from a longitudinal NIH-funded project (K23HD054720)  
576 that focused on children's reading development from kindergarten (mean age at  $t1$  =

RUNNING HEAD: THALAMUS LINKS PATERNAL AGE AND OFFSPRING'S READING

577 5.58 years, standard deviation [ $SD$ ] = 0.43) to third grade (partial data from this  
578 larger project were included in prior publications unrelated to the goals of the  
579 current study: Black et al., 2012; Gimenez et al., 2014; Hosseini et al., 2013; Myers  
580 et al., 2014; Yamagata et al., 2016). All children were healthy native English  
581 speakers without any neurological or psychiatric disorders (e.g., attention  
582 deficit/hyperactivity disorder) or contraindications to MRI based on parental report.  
583 Initially, 51 children and their parents were included. For the longitudinal behavior  
584 analyses, eight children were excluded because of attrition ( $n = 5$ ), no record of  
585 father's age ( $n = 1$ ), or more than one child from the same parents ( $n = 2$ ). In the  
586 latter case, we excluded one child from each pair according to T1 image quality,  
587 which was qualitatively evaluated by an investigator who was otherwise blind to  
588 the behavioral and demographic information. The final sample included 43  
589 unrelated children. For the neuroanatomical analysis, another seven children were  
590 excluded because of incomplete T1 data collection or poor image quality at either  $t1$   
591 or  $t2$  by visual check, leaving 36 children in the final sample. For the diffusion-  
592 weighted imaging analysis, 23 children with the same acquisition sequence were  
593 included. There was no significant difference in either familial or any behavioral  
594 measures between the total cohort and any sub-groups (all  $p$ 's > 0.1). The  
595 Institutional Review Boards of Stanford University where data were collected and  
596 principal investigator was at the time of the study, and the University of California  
597 San Francisco where data were analyzed due to transition of the principal

RUNNING HEAD: THALAMUS LINKS PATERNAL AGE AND OFFSPRING'S READING

598 investigator, approved the present study. Both informed assent and consent were  
599 obtained from children and their parents/guardians.

600 **Family information and behavioral measurements**

601 Demographic information, family and behavioral measures are summarized in  
602 Table S1. Family information collected at *t*1 include: PatAGE; MatAGE; ARHQ  
603 (Lefly & Pennington, 2000) from both parents that was used to estimate familial  
604 history of reading difficulty; SES, which was a composite index computed from  
605 family annual income, parental educational level and occupation with principal  
606 component analysis (Noble, Wolmetz, Ochs, Farah, & McCandliss, 2006); and  
607 HOME, an index for home environment including home literacy environment  
608 (Segers et al., 2016). A battery of behavioral tests measuring intelligence, language  
609 and reading related skills was administrated. Verbal Comprehension, Concept  
610 Formation, and Visual Matching sub-tests of the Woodcock-Johnson III Tests of  
611 Cognitive Abilities (McGrew & Schrank, 2007), which have reliabilities of 0.80 or  
612 higher and have been used as a proxy for IQ, were used to estimate general  
613 cognitive abilities (Shaw, 2010). Vocabulary was measured with Peabody Picture  
614 Vocabulary Test (4<sup>th</sup> edition) (Dunn & Dunn, 2007). Blending, Elision, Memory for  
615 Digit, Nonword Repetition sub-tests from the Comprehensive Test of Phonological  
616 Processing (1<sup>st</sup> Edition) (CTOPP; Wagner, Torgesen, & Rashotte, 1999) were used to  
617 measure phonological skills. Finally, RAN (Objects and Colors sub-tests) (Wolf &  
618 Denkla, 2005) and Letter Identification sub-test of Woodcock Reading Mastery Test  
619 R/NU (WRMT-R/NU; Mather, 1998) were administered.

RUNNING HEAD: THALAMUS LINKS PATERNAL AGE AND OFFSPRING'S READING

620           The same set of tests was used at *t2*. Numbers and Letters sub-tests of RAN  
621 were further included at *t2* to measure print-sound mapping efficiency. Additionally,  
622 tests measuring different aspects of reading ability were administered at *t2*,  
623 including Sight Word Efficiency and Phonemic Decoding Efficiency sub-tests from  
624 the Test of Word Reading Efficiency (1<sup>st</sup> Edition) (TOWRE; Torgesen, Wagner, &  
625 Rashotte, 1999), Word Identification, Word Attack, and Passage Comprehension  
626 sub-tests from WRMT-R/NU, and Reading Fluency and Spelling sub-tests from WJ-  
627 III Tests of Achievement. Details of these measures can also be found in our  
628 previous papers (Black et al., 2012; Myers et al., 2014).

629 **Image acquisition**

630 High-resolution T1-weighted images (fast spoiled gradient echo) for each child were  
631 collected at both time-points with the following parameters: 128 slices; thickness =  
632 1.2 mm; NEX = 1; repetition time (TR) = 8.5 ms; echo time (TE) = 3.4 ms; inversion  
633 time (TI) = 400 ms; in-plane resolution = 256 × 256; voxel size = 0.9 × 0.9 × 1.2 mm;  
634 flip angle (FA) = 15 °; field of view (FOV) = 22 cm. High-angular resolution  
635 diffusion-imaging (HARDI; single-shot spin-echo, echo-planar imaging sequence)  
636 were collected at *t2* with the following parameters: 46 axial slices; slice thickness =  
637 3 mm; repetition time (TR) = 5000 ms; echo time (TE) = 81.7 ms; in-plane resolution  
638 = 128 × 128; voxel size = 2.0 × 2.0 × 3.0 mm<sup>3</sup>; 150 directions with  $b = 2500$  s/mm<sup>2</sup>; 6  
639 volumes with  $b = 0$  s/mm<sup>2</sup>. All images were acquired using a GE Healthcare 3.0 T  
640 750 scanner with eight-channel phased-array head coil at Richard M. Lucas Center  
641 for Imaging at Stanford University.

RUNNING HEAD: THALAMUS LINKS PATERNAL AGE AND OFFSPRING'S READING

642 **Behavioral data analyses**

643 To reduce dimensionality of behavioral metrics, two factor analyses were conducted  
644 on reading-related tests for *t1* and *t2* separately; *t1*: Blending, Elision, Memory for  
645 Digits, Nonword Repetition sub-tests of CTOPP, Objects and Colors sub-tests of  
646 RAN, Letter Identification sub-test of WRMT; and *t2*: Blending, Elision, Memory for  
647 Digits, Nonword Repetition sub-tests of CTOPP, Numbers, Letters, Objects and  
648 Colors sub-tests of RAN, Sight Word Efficiency and Phonemic Decoding Efficiency  
649 sub-tests of TOWRE, Word Identification, Word Attack, Passage Comprehension  
650 sub-tests of WRMT-R/NU, Reading Fluency and Spelling sub-tests of WJ-III Tests  
651 of Achievement. In each analysis, Maximum Likelihood was used as the extraction  
652 method, Varimax was used as the rotation approach, and Bartlett method was used  
653 to calculate factor scores. From *t1* behavioral metrics, we obtained two factors using  
654 the criteria of eigenvalues greater than 1 (Table S3). These factors together  
655 explained 53.8% of the total variance. Since PA and RAN loaded heavily on each  
656 factor, respectively, we named them as *t1*PA and *t1*RAN (letter knowledge  
657 contributes to both factors, but more to *t1*PA). Since PA, RAN, and letter knowledge  
658 have been repeatedly shown to be the most robust and reliable measures for  
659 predicting reading development in alphabetic languages (Caravolas et al., 2012;  
660 Hulme et al., 2005; Hulme & Snowling, 2013), we used these two scores as  
661 precursors of reading in subsequent analyses. Using the same approach, we  
662 obtained three factors from *t2* metrics, which explained 67.2% of the total variance



RUNNING HEAD: THALAMUS LINKS PATERNAL AGE AND OFFSPRING'S READING

663 and were named as *t2*READ, *t2*PA, and *t2*RAN according to the factor loading  
664 scores (Table S4).

665 To test our hypothesis about the relationship between APA and reading, we  
666 first performed simple correlation. Once significant correlation between PatAGE  
667 and *t2*READ was observed, three hierarchical multiple regressions were further  
668 conducted to test three hypotheses in the following order: (1) APA effect remains  
669 significant after controlling for demographic variables; (2) APA effect is present  
670 above and beyond other familial factors; (3) APA effect is not explained by *t1*  
671 cognitive-linguistic skills (*t1*PA and *t1*RAN) generally known to be highly heritable  
672 and is relatively independent of these precursors. Therefore, in the first model, we  
673 entered demographic variables (*t2* age, gender, handedness and average pIQ from *t1*  
674 and *t2*) in the first step and PatAGE in the second step (Model 1 in Table 1). In the  
675 second model, besides the aforementioned nuisance variables, we additionally  
676 regressed out birth order (Price, 2008), parental reading history (van Bergen et al.,  
677 2015), SES (Pan et al., 2016), home literacy environment (Segers et al., 2016), which  
678 are known to be associated with reading; and maternal age, which was highly  
679 correlated with PatAGE (Edwards & Roff, 2010; Saha et al., 2009) (Model 2 in Table  
680 1). In the third (final) model, *t1*PA and *t1*RAN (Hulme et al., 2005) were  
681 additionally entered in the third step, just before PatAGE was entered (Model 3 in  
682 Table 1), to examine whether the APA effect was present beyond *t1* cognitive-  
683 linguistic skills. All statistics were done with SPSS 21.0 (IBM, Inc.), and *p*-values  
684 were two-tailed while statistical significance was set at 0.05.

RUNNING HEAD: THALAMUS LINKS PATERNAL AGE AND OFFSPRING'S READING

685           One main aim of this study was to explore the cognitive mechanisms  
686 underlying the APA effect, e.g., whether the APA effect on reading was mediated by  
687 cognitive-linguistic precursors such as PA. But since *t1*RAN and *t1*PA showed no  
688 significant correlations with PatAGE, no further mediation models were established  
689 with *t1*RAN or *t1*PA as mediators.

690 **Structural image preprocessing**

691 Both cross-sectional and longitudinal analyses were conducted with VBM8  
692 (<http://www.neuro.uni-jena.de/vbm/>), a toolbox for SPM8  
693 (<http://www.fil.ion.ucl.ac.uk/spm/software/spm8/>), implemented in Matlab  
694 (Mathworks). For the across-sectional analyses at *t1* and *t2*, individual T1 volumes  
695 were first segmented into gray matter, white matter and cerebrospinal fluid with a  
696 resampling at 1.5 mm<sup>3</sup>. Then, the gray matter segments were registered to a T1  
697 template in MNI-space (Montreal Neurological Institute) by using both affine  
698 normalization and Diffeomorphic Anatomical Registration Through Exponentiated  
699 Lie Algebra (DARTEL) (Ashburner, 2007), and subsequently modulated by the  
700 'affine and non-linear' modulation ([http://www.neuro.uni-](http://www.neuro.uni-jena.de/vbm/segmentation/modulation/)  
701 [jena.de/vbm/segmentation/modulation/](http://www.neuro.uni-jena.de/vbm/segmentation/modulation/)). The modulated images containing regional  
702 tissue volume of gray matter for each voxel were smoothed with an 8-mm full-width  
703 half-maximum isotropic Gaussian kernel. Voxels with gray matter values < 0.1 were  
704 excluded (i.e., absolute threshold masking) to avoid possible edge effects.

RUNNING HEAD: THALAMUS LINKS PATERNAL AGE AND OFFSPRING'S READING

705 As for the longitudinal VBM analysis, 'Preprocessing of Longitudinal Data'  
706 module in VBM8, which contains specific preprocessing steps was used. Intra-  
707 subject realignment, bias correction, segmentation, and normalization (Ashburner,  
708 2007) were done sequentially as described elsewhere (Ridgway et al., 2007). After  
709 applying spatial smoothing with an 8-mm full-width half-maximum Gaussian  
710 kernel, we obtained maps of gray matter volume for both time-points. We generated  
711 GMV maps reflecting change from  $t1$  to  $t2$  for further analyses (such that a positive  
712 change would indicate growth from  $t1$  to  $t2$ ).

713 **Whole-brain regression analyses**

714 First, we examined the correlations between PatAGE and global measurements, i.e.,  
715  $t1$ TIV (defined as the sum of total gray matter, white matter and cerebrospinal fluid)  
716 and  $t2$ TIV. Then, we examined whether PatAGE correlated with  $\Delta$ TIV between two  
717 time-points (such that a positive change would indicate growth from  $t1$  to  $t2$ ) while  
718 controlling for the baseline (i.e.,  $t1$ TIV). After that, to examine relationships  
719 between regional GMV at each time-point, as well as  $\Delta$ GMV with PatAGE, voxel-  
720 wised whole brain regression was conducted while controlling for the effect of global  
721 measurements. Specifically,  $t1$ TIV or  $t2$ TIV was controlled in cross-sectional  
722 analyses for  $t1$  and  $t2$ , respectively. In the longitudinal analysis,  $t1$ TIV and  $\Delta$ TIV  
723 were controlled to exclude effects from initial gross volume and its development.  
724 Since no significant correlations between  $t1$ TIV,  $\Delta$ TIV, and PatAGE (all  $p$ 's > 0.1),  
725 the model was free from multicollinearity. Topological FWE correction  
726 implemented in SPM8 was used to determine corrected thresholds of statistical

RUNNING HEAD: THALAMUS LINKS PATERNAL AGE AND OFFSPRING'S READING

727 significance. All clusters significant at a threshold of corrected  $p < 0.05$  corrected for  
728 the whole brain ( $p$ -voxel  $< 0.005$  for height) were reported in Montreal Neurological  
729 Institute (MNI) space. Since no significant clusters were found for voxel-wise  
730 analyses at either time-point  $t1$  or  $t2$ , all further analyses focused on longitudinal  
731 changes. In particular, for significant clusters, region-of-interest (ROI) analyses  
732 were conducted to examine the robustness of the effect. For this purpose, value of  
733 each voxel in the cluster was extracted and averaged, then put in the hierarchical  
734 multiple regression analyses as the dependent variable. First, demographic  
735 variables ( $t1$  age, time interval between  $t1$  and  $t2$ , gender, handedness, average of  $t1$   
736 and  $t2$  pIQ),  $t1$ TIV and  $\Delta$ TIV were entered in the first step, while PatAGE was  
737 entered in the second step. Secondly, we further controlled for MatAGE and  
738 MatARHQ since they showed significant correlation with PatAGE.

739       Next, we examined the relationship between  $\Delta$ GMV and children's  $t2$ READ  
740 in the cluster that was significantly associated with PatAGE (i.e., the APA-cluster,  
741 which was in the left thalamus) by using small volume correction ( $p$ -voxel  $< 0.005$ ,  
742  $p$ -cluster  $< 0.05$ , topological FWE correction) while  $t1$ TIV and  $\Delta$ TIV were  
743 statistically controlled. The mean  $\Delta$ GMV was calculated from this APA-cluster in  
744 the left thalamus for subsequent ROI analyses. Then, hierarchical multiple  
745 regression analyses were conducted to test for the robustness of the effect. In the  
746 first model,  $t2$ READ was the dependent variable and demographic variables ( $t2$  age,  
747 gender, handedness, average pIQ),  $t1$ TIV and  $\Delta$ TIV were entered in the first step. In  
748 the second model,  $t1$  cognitive-linguistic skills (i.e.,  $t1$ PA and  $t1$ IRAN) were further

RUNNING HEAD: THALAMUS LINKS PATERNAL AGE AND OFFSPRING'S READING

749 entered in the second step since they were also significant predictors of *t2*READ in  
750 previous analysis. The average  $\Delta$ GMV was entered in the final step.

751 **Mediation analyses**

752 In the region where volumetric change significantly correlated with both PatAGE  
753 and *t2*READ, we used mediation as the conceptually preferred model to examine  
754 whether the negative impact from APA on reading was mediated by brain  
755 maturation. To test indirect effects, bootstrapping (10,000 samples) was used to  
756 obtain 95% confidence intervals. We first ran a basic model without controlling for  
757 covariates. If a significant indirect effect existed (i.e., confidence intervals do not  
758 overlap zero), we further adjusted the model for demographic variables (*t2* age,  
759 gender, handedness, average pIQ), *t1*TIV,  $\Delta$ TIV, and *t1* cognitive-linguistic  
760 precursors (*t1*RAN and *t1*PA) to confirm the uniqueness and robustness of the effect.

761       Recently, PA has been reported to partially mediate the effect of parental  
762 reading on offspring's reading (van Bergen et al., 2015). If we replicate this result,  
763 we can (to some extent) make inferences about multi-level intergenerational  
764 transmission, together with the APA findings. Because we found significant  
765 correlations between MatARHQ and *t1*PA, MatARHQ and *t2*READ, *t1*PA and  
766 *t2*READ (Table S2), we thus tested whether there was a mediating role of *t1*PA on  
767 the relationship between MatARHQ (as a proxy for parental reading) and *t2*READ.  
768 Age at *t2*, gender, handedness, average pIQ, and *t1*RAN were further controlled.

RUNNING HEAD: THALAMUS LINKS PATERNAL AGE AND OFFSPRING'S READING

769 PROCESS procedure (release 2.16.1) implemented in SPSS was used to conduct  
770 mediation analyses (Hayes, 2013).

771 **Atlases, large datasets and diffusion imaging data used to examine the**  
772 **location and connectivity patterns of VBM findings**

773 We examined fine-grained spatial localization and connectivity patterns of the APA-  
774 cluster capitalizing on the fact these have been shown to inform possible functional  
775 roles of a particular brain region (in this case, the left thalamic area) in the absence  
776 of a comprehensive set of cognitive and behavioral measures. We therefore adopted  
777 multiple complementary analytical approaches to obtain more information about  
778 fine-grained spatial localization and connectivity patterns. First, we spatially  
779 localized the APA-cluster using two brain atlases. (1) MOREL ATLAS: The  
780 thalamus consists of several nuclei where each are associated with different  
781 functions. We therefore calculated the number and percentage of voxels that  
782 overlapped with the APA-cluster and each thalamic nucleus from the Morel Atlas, a  
783 histological atlas that is optimal for thalamic targets, which is in MNI-space (for  
784 details, see Jakab et al., 2012; Krauth et al., 2010); (2) OXFORD THALAMIC  
785 CONNECTIVITY PROBABILITY ATLAS: The structural connectivity patterns  
786 provides information about function of a given region (Barron et al., 2015; Behrens  
787 et al., 2003). We therefore used Oxford Thalamic Connectivity Probability Atlas  
788 with the atlasquery tool implemented in FSL  
789 (<https://fsl.fmrib.ox.ac.uk/fsl/fslwiki/Atlases>) to obtain the probability that the APA-  
790 cluster is structurally connected to different cortical areas (de Moura et al., 2016).

RUNNING HEAD: THALAMUS LINKS PATERNAL AGE AND OFFSPRING'S READING

791           Next, to further understand the functional role of the APA-cluster and  
792 complementary to the results from analyses using the histological and diffusion  
793 imaging atlases, we examined APA-cluster-associated cortical patterns by using an  
794 online database, Neurosynth (v0.5; Yarkoni et al., 2011). In particular, we  
795 generated a co-activation map by including all fMRI studies in the database ( $N >$   
796 10,900) and used the whole APA-cluster as ROI. A threshold of False Discovery  
797 Rate (FDR) at  $p < 0.01$  was used to obtain significant regions that is most likely to  
798 be reported in fMRI studies when the APA-cluster is also reported (i.e., forward  
799 inference). In addition, we generated a seed-based whole-brain RSFC map by using  
800 data of 1,000 individuals from the 1,000 Functional Connectome Dataset (Biswal et  
801 al., 2010; Yeo et al., 2011). The center of gravity (COG) of the APA-cluster (MNI:  $x =$   
802  $-19$ ,  $y = -28$ ,  $z = 6$ ) was used as the seed, and functional connectivity from the seed to  
803 the rest of the brain was calculated. The resultant map was thresholded with a  
804 liberal cutoff value of  $r = 0.01$  as in the previous literature (Yang, Rosenblau, Keifer,  
805 & Pelphrey, 2015). To be more conservative, we took the co-activation map that  
806 overlapped with the RSFC map. Dice coefficients between the conjunction map and  
807 the seven large-scale intrinsic connectivity networks (visual, somatomotor, dorsal  
808 attention, ventral attention, limbic, frontoparietal, and default networks) from Yeo  
809 et al. (2011) were then calculated to examine which functional network may most  
810 overlap with the APA-cluster-associated cortical pattern.

811           In the final step, these results were confirmed by analyzing white matter  
812 connectivity, where fibers passing the APA-cluster were reconstructed using

RUNNING HEAD: THALAMUS LINKS PATERNAL AGE AND OFFSPRING'S READING

813 deterministic tractography. Diffusion-weighted imaging preprocessing was  
814 performed by using ExploreDTI (<http://www.exploredti.com>; A Leemans, Jeurissen,  
815 Sijbers, & Jones, 2009). The pre-processing steps consisted of visual quality  
816 assurance and rigorous motion and eddy current correction with the required  
817 reorientation of the b-matrix (Alexander Leemans & Jones, 2009). The diffusion  
818 tensors were calculated using a non-linear regression procedure (Pierpaoli & Basser,  
819 1996). The individual datasets were non-rigidly normalized to MNI (Montreal  
820 Neurological Institute) space. Next, whole brain tractography was performed for  
821 each individual dataset using a deterministic approach (Basser, Pajevic, Pierpaoli,  
822 Duda, & Aldroubi, 2000). Fibers (streamlines) were reconstructed by defining seed  
823 points distributed uniformly throughout the data at  $2.0 \times 2.0 \times 2.0$  resolution,  
824 following the main direction with step size set at 1.0 mm. Fiber tracking was  
825 discontinued when the fiber entered a voxel with  $FA < 0.2$  or made a high angular  
826 turn (angle  $> 40^\circ$ ), or when the fiber was outside the fiber length range of 50-500  
827 mm. Two analyses were then conducted: (1) To localize fibers and get a general view,  
828 the cluster related to PatAGE was used as ROI and all fibers passing through this  
829 cluster were delineated. The delineated fibers and its projection points were visually  
830 inspected, after which individual maps were binarized and summed to acquire  
831 probabilistic map across participants. (2) To complement the Neurosynth analysis  
832 above and to identify the functional network most relevant to the APA-cluster, the  
833 numbers of streamlines passing through the APA-cluster and each of the 7  
834 functional networks from the Yeo et al. (2011) were calculated and normalized by



RUNNING HEAD: THALAMUS LINKS PATERNAL AGE AND OFFSPRING'S READING

835 dividing this number by size of the target network. The results were treated as the  
836 connectivity strength and compared between networks with one-way ANOVA (as  
837 well as post-hoc analyses). Furthermore, we examined the correlations between the  
838 connectivity strength with PatAGE as well as with *t2READ*.

839 **References**

- 840 1. Abbott, I., Larkin, R. F., & Dunn, A. K. (2015). Spatial Attention Shifting and  
841 Phonological Processing in Adults with Dyslexia. *The New School Psychology*  
842 *Bulletin*, 12(1), 10-23.
- 843 2. Amso, D., & Scerif, G. (2015). The attentive brain: insights from developmental  
844 cognitive neuroscience. *Nat Rev Neurosci*, 16(10), 606-619.
- 845 3. Arcaro, M. J., Pinsk, M. A., & Kastner, S. (2015). The Anatomical and Functional  
846 Organization of the Human Visual Pulvinar. *J Neurosci*, 35(27), 9848-9871.
- 847 4. Arend, I., Machado, L., Ward, R., McGrath, M., Ro, T., & Rafal, R. D. (2008).  
848 Chapter 5.15 - The role of the human pulvinar in visual attention and action:  
849 evidence from temporal-order judgment, saccade decision, and antisaccade  
850 tasks. In K. Christopher & R. J. Leigh (Eds.), *Progress in brain research* (Vol.  
851 Volume 171, pp. 475-483): Elsevier.
- 852 5. Ashburner, J. (2007). A fast diffeomorphic image registration algorithm.  
853 *Neuroimage*, 38(1), 95-113.

RUNNING HEAD: THALAMUS LINKS PATERNAL AGE AND OFFSPRING'S READING

- 854 6. Awadalla, P., Gauthier, J., Myers, R. A., Casals, F., Hamdan, F. F., Griffing, A.  
855 R., . . . Rouleau, G. A. (2010). Direct measure of the de novo mutation rate in  
856 autism and schizophrenia cohorts. *Am J Hum Genet*, *87*(3), 316-324.
- 857 7. Ball, G., Boardman, J. P., Rueckert, D., Aljabar, P., Arichi, T., Merchant, N., . . .  
858 Counsell, S. J. (2012). The effect of preterm birth on thalamic and cortical  
859 development. *Cereb Cortex*, *22*(5), 1016-1024.
- 860 8. Barron, D. S., Eickhoff, S. B., Clos, M., & Fox, P. T. (2015). Human pulvinar  
861 functional organization and connectivity. *Human Brain Mapping*, *36*(7),  
862 2417-2431.
- 863 9. Bas-Hoogendam, J. M., Blackford, J. U., Bruhl, A. B., Blair, K. S., van der Wee,  
864 N. J., & Westenberg, P. M. (2016). Neurobiological candidate endophenotypes  
865 of social anxiety disorder. *Neurosci Biobehav Rev*, *71*, 362-378.
- 866 10. Basser, P. J., Pajevic, S., Pierpaoli, C., Duda, J., & Aldroubi, A. (2000). In vivo  
867 fiber tractography using DT-MRI data. *Magnetic Resonance in Medicine*,  
868 *44*(4), 625-632.
- 869 11. Behrens, T., Johansen-Berg, H., Woolrich, M., Smith, S., Wheeler-Kingshott, C.,  
870 Boulby, P., . . . Ciccarelli, O. (2003). Non-invasive mapping of connections  
871 between human thalamus and cortex using diffusion imaging. *Nat Neurosci*,  
872 *6*(7), 750-757.
- 873 12. Bishop, D. V. (2015). The interface between genetics and psychology: lessons  
874 from developmental dyslexia. *Proc Biol Sci*, *282*(1806), 20143139.

RUNNING HEAD: THALAMUS LINKS PATERNAL AGE AND OFFSPRING'S READING

- 875 13. Biswal, B. B., Mennes, M., Zuo, X.-N., Gohel, S., Kelly, C., Smith, S. M., . . .  
876 Milham, M. P. (2010). Toward discovery science of human brain function.  
877 *Proceedings of the National Academy of Sciences, 107*(10), 4734-4739.
- 878 14. Black, J. M., Tanaka, H., Stanley, L., Nagamine, M., Zakerani, N., Thurston, A.,  
879 . . . Hoeft, F. (2012). Maternal history of reading difficulty is associated with  
880 reduced language-related gray matter in beginning readers. *Neuroimage,*  
881 *59*(3), 3021-3032.
- 882 15. Bosse, M.-L., Tainturier, M. J., & Valdois, S. (2007). Developmental dyslexia:  
883 The visual attention span deficit hypothesis. *Cognition, 104*(2), 198-230.
- 884 16. Bosse, M. L. (2015). Learning to read and spell: How children acquire word  
885 orthographic knowledge. *Child development perspectives, 9*(4), 222-226.
- 886 17. Brain Development Cooperative, G. (2012). Total and Regional Brain Volumes  
887 in a Population-Based Normative Sample from 4 to 18 Years: The NIH MRI  
888 Study of Normal Brain Development. *Cereb Cortex, 22*(1), 1-12.
- 889 18. Bray, I., Gunnell, D., & Smith, G. D. (2006). Advanced paternal age: How old is  
890 too old? *Journal of epidemiology and community health, 60*(10), 851-853.
- 891 19. Bridge, H., Leopold, D. A., & Bourne, J. A. (2016). Adaptive Pulvinar Circuitry  
892 Supports Visual Cognition. *Trends Cogn Sci, 20*(2), 146-157.
- 893 20. Brown, W. E., Eliez, S., Menon, V., Rumsey, J. M., White, C. D., & Reiss, A. L.  
894 (2001). Preliminary evidence of widespread morphological variations of the  
895 brain in dyslexia. *Neurology, 56*(6), 781-783.

RUNNING HEAD: THALAMUS LINKS PATERNAL AGE AND OFFSPRING'S READING

- 896 21. Brunswick, N., McCrory, E., Price, C. J., Frith, C. D., & Frith, U. (1999). Explicit  
897 and implicit processing of words and pseudowords by adult developmental  
898 dyslexics: A search for Wernicke's Wortschatz? *Brain*, *122* ( Pt 10), 1901-  
899 1917.
- 900 22. Buchholz, J., & Davies, A. A. (2005). Adults with dyslexia demonstrate space-  
901 based and object-based covert attention deficits: Shifting attention to the  
902 periphery and shifting attention between objects in the left visual field. *Brain*  
903 *and Cognition*, *57*(1), 30-34.
- 904 23. Buchholz, J., & Davies, A. A. (2008). Adults with Dyslexia Demonstrate  
905 Attentional Orienting Deficits. *Dyslexia*, *14*(4), 247-270.
- 906 24. Cannon, M. (2009). Contrasting effects of maternal and paternal age on  
907 offspring intelligence: the clock ticks for men too. *PLoS Med*, *6*(3), e42.
- 908 25. Caravolas, M., Lervag, A., Mousikou, P., Efrim, C., Litavsky, M., Onochie-  
909 Quintanilla, E., . . . Hulme, C. (2012). Common patterns of prediction of  
910 literacy development in different alphabetic orthographies. *Psychol Sci*, *23*(6),  
911 678-686.
- 912 26. Carroll, J. M., Solity, J., & Shapiro, L. R. (2015). Predicting dyslexia using  
913 prereading skills: the role of sensorimotor and cognitive abilities. *Journal of*  
914 *Child Psychology and Psychiatry*.
- 915 27. Chen, X. K., Wen, S. W., Krewski, D., Fleming, N., Yang, Q. Y., & Walker, M. C.  
916 (2008). Paternal age and adverse birth outcomes: teenager or 40+, who is at  
917 risk? *Human Reproduction*, *23*(6), 1290-1296.

RUNNING HEAD: THALAMUS LINKS PATERNAL AGE AND OFFSPRING'S READING

- 918 28. Chudal, R., Leivonen, S., Rintala, H., Hinkka-Yli-Salomaki, S., & Sourander, A.  
919 (2017). Parental age and the risk of obsessive compulsive disorder and  
920 Tourette syndrome / chronic tic disorder in a nationwide population-based  
921 sample. *J Affect Disord*, *223*, 101-105.
- 922 29. Corbetta, M., Patel, G., & Shulman, G. L. (2008). The reorienting system of the  
923 human brain: from environment to theory of mind. *Neuron*, *58*(3), 306-324.
- 924 30. Crow, J. F. (2000). The origins, patterns and implications of human spontaneous  
925 mutation. *Nat Rev Genet*, *1*(1), 40-47.
- 926 31. D'Onofrio, B. M., Rickert, M. E., Frans, E., Kuja-Halkola, R., Almqvist, C.,  
927 Sjölander, A., . . . Lichtenstein, P. (2014). Paternal age at childbearing and  
928 offspring psychiatric and academic morbidity. *JAMA Psychiatry*, *71*(4), 432-  
929 438.
- 930 32. Da Silva, P. B., Ueki, K., Oliveira, D. G., Boggio, P. S., & Macedo, E. C. (2016).  
931 Early stages of sensory processing but not semantic integration is altered in  
932 dyslexic adults. *Front Psychol*, *7*, 430.
- 933 33. Davis, N., Fan, Q., Compton, D. L., Fuchs, D., Fuchs, L. S., Cutting, L. E., . . .  
934 Anderson, A. W. (2010). Influences of Neural Pathway Integrity on Children's  
935 Response to Reading Instruction. *Front Syst Neurosci*, *4*, 150.
- 936 34. de Moura, L. M., Cogo-Moreira, H., Brandão de Ávila, C. R., Pan, P. M.,  
937 Gadelha, A., Moriyama, T., . . . Picon, F. A. (2016). Children with Poor  
938 Reading Skills at the Word Level Show Reduced Fractional Anisotropy in  
939 White Matter Tracts of Both Hemispheres. *Brain Connect*.

RUNNING HEAD: THALAMUS LINKS PATERNAL AGE AND OFFSPRING'S READING

- 940 35. Deciphering Developmental Disorders Study. (2017). Prevalence and  
941 architecture of de novo mutations in developmental disorders. *Nature*.
- 942 36. Diaz, B., Hintz, F., Kiebel, S. J., & von Kriegstein, K. (2012). Dysfunction of the  
943 auditory thalamus in developmental dyslexia. *Proc Natl Acad Sci U S A*,  
944 *109*(34), 13841-13846.
- 945 37. Dunn, D. M., & Dunn, L. M. (2007). *Peabody picture vocabulary test: Manual*:  
946 Pearson.
- 947 38. Edwards, R. D., & Roff, J. (2010). Negative effects of paternal age on children's  
948 neurocognitive outcomes can be explained by maternal education and number  
949 of siblings. *PLoS One*, *5*(9), e12157.
- 950 39. Eising, E., Carrion-Castillo, A., VINO, A., Strand, E. A., Jakielski, K. J., Scerri, T.  
951 S., . . . Fisher, S. E. (2018). A set of regulatory genes co-expressed in  
952 embryonic human brain is implicated in disrupted speech development. *Mol*  
953 *Psychiatry*.
- 954 40. Facoetti, A., Paganoni, P., Turatto, M., Marzola, V., & Mascetti, G. G. (2000).  
955 Visual-spatial attention in developmental dyslexia. *Cortex*, *36*(1), 109-123.
- 956 41. Facoetti, A., Zorzi, M., Cestnick, L., Lorusso, M. L., Molteni, M., Paganoni, P., . .  
957 . Mascetti, G. G. (2006). The relationship between visuo-spatial attention and  
958 nonword reading in developmental dyslexia. *Cognitive Neuropsychology*,  
959 *23*(6), 841-855.

RUNNING HEAD: THALAMUS LINKS PATERNAL AGE AND OFFSPRING'S READING

- 960 42. Fan, Q., Davis, N., Anderson, A. W., & Cutting, L. E. (2014). Thalamo-cortical  
961 connectivity: what can diffusion tractography tell us about reading difficulties  
962 in children? *Brain Connect*, 4(6), 428-439.
- 963 43. Fischer, J., & Whitney, D. (2012). Attention gates visual coding in the human  
964 pulvinar. *Nature Communications*, 3, 1051.
- 965 44. Franceschini, S., Gori, S., Ruffino, M., Pedrolli, K., & Facoetti, A. (2012). A  
966 Causal Link between Visual Spatial Attention and Reading Acquisition.  
967 *Current Biology*, 22(9), 814-819.
- 968 45. Frans, E. M., Sandin, S., Reichenberg, A., Langstrom, N., Lichtenstein, P.,  
969 McGrath, J. J., & Hultman, C. M. (2013). Autism risk across generations: a  
970 population-based study of advancing grandpaternal and paternal age. *JAMA*  
971 *Psychiatry*, 70(5), 516-521.
- 972 46. Galaburda, A. M., & Eidelberg, D. (1982). Symmetry and asymmetry in the  
973 human posterior thalamus. II. Thalamic lesions in a case of developmental  
974 dyslexia. *Arch Neurol*, 39(6), 333-336.
- 975 47. Gimenez, P., Bugescu, N., Black, J. M., Hancock, R., Pugh, K., Nagamine, M., . .  
976 . McCandliss, B. D. (2014). Neuroimaging correlates of handwriting quality  
977 as children learn to read and write. *Front Hum Neurosci*, 8.
- 978 48. Giraldo-Chica, M., Hegarty, J. P., 2nd, & Schneider, K. A. (2015). Morphological  
979 differences in the lateral geniculate nucleus associated with dyslexia.  
980 *Neuroimage Clin*, 7, 830-836.

RUNNING HEAD: THALAMUS LINKS PATERNAL AGE AND OFFSPRING'S READING

- 981 49. Girard, S. L., Bourassa, C. V., Lemieux Perreault, L. P., Legault, M. A.,  
982 Barhdadi, A., Ambalavanan, A., . . . Rouleau, G. A. (2016). Paternal Age  
983 Explains a Major Portion of De Novo Germline Mutation Rate Variability in  
984 Healthy Individuals. *PLoS One*, *11*(10), e0164212.
- 985 50. Giraud, A. L., & Ramus, F. (2013). Neurogenetics and auditory processing in  
986 developmental dyslexia. *Curr Opin Neurobiol*, *23*(1), 37-42.
- 987 51. Gori, S., & Facoetti, A. (2015). How the visual aspects can be crucial in reading  
988 acquisition: The intriguing case of crowding and developmental dyslexia.  
989 *Journal of vision*, *15*(1).
- 990 52. Goswami, U. (2015). Sensory theories of developmental dyslexia: three  
991 challenges for research. *Nat Rev Neurosci*, *16*(1), 43-54.
- 992 53. Grigorenko, E. L. (2001). Developmental dyslexia: An update on genes, brains,  
993 and environments. *Journal of Child Psychology and Psychiatry*, *42*(1), 91-125.
- 994 54. Grigorenko, E. L. (2004). Genetic bases of developmental dyslexia: A capsule  
995 review of heritability estimates. *Enfance*, *56*(3), 273-288.
- 996 55. Hawke, J. L., Wadsworth, S. J., & DeFries, J. C. (2006). Genetic influences on  
997 reading difficulties in boys and girls: the Colorado twin study. *Dyslexia*, *12*(1),  
998 21-29.
- 999 56. Hayes, A. F. (2013). *Introduction to mediation, moderation, and conditional*  
1000 *process analysis: A regression-based approach*: Guilford Press.
- 1001 57. Ho, T. C., Sanders, S. J., Gotlib, I. H., & Hoefft, F. (2016). Intergenerational  
1002 Neuroimaging of Human Brain Circuitry. *Trends Neurosci*.



RUNNING HEAD: THALAMUS LINKS PATERNAL AGE AND OFFSPRING'S READING

- 1003 58. Hoeft, F., & Hancock, R. (2017). Intergenerational Transmission of Reading and  
1004 Reading Brain Networks. In A. M. Galaburda, N. Gaab, & F. Hoeft (Eds.),  
1005 *Dyslexia and Neuroscience: The Geschwind-Galaburda Hypothesis 30 Years*  
1006 *Later*. Baltimore: Paul H. Brookes Publishing Co.
- 1007 59. Hosseini, S. M., Black, J. M., Soriano, T., Bugescu, N., Martinez, R., Raman, M.  
1008 M., . . . Hoeft, F. (2013). Topological properties of large-scale structural brain  
1009 networks in children with familial risk for reading difficulties. *Neuroimage*,  
1010 *71*, 260-274.
- 1011 60. Hulme, C., Snowling, M., Caravolas, M., & Carroll, J. (2005). Phonological skills  
1012 are (probably) one cause of success in learning to read: A comment on Castles  
1013 and Coltheart. *Scientific Studies of Reading*, *9*(4), 351-365.
- 1014 61. Hulme, C., & Snowling, M. J. (2013). Learning to read: What we know and what  
1015 we need to understand better. *Child development perspectives*, *7*(1), 1-5.
- 1016 62. Jakab, A., Blanc, R., Berényi, E., & Székely, G. (2012). Generation of  
1017 individualized thalamus target maps by using statistical shape models and  
1018 thalamocortical tractography. *American Journal of Neuroradiology*, *33*(11),  
1019 2110-2116.
- 1020 63. Janecka, M., Mill, J., Basson, M. A., Goriely, A., Spiers, H., Reichenberg, A., . . .  
1021 Fernandes, C. (2017). Advanced paternal age effects in neurodevelopmental  
1022 disorders-review of potential underlying mechanisms. *Transl Psychiatry*, *7*(1),  
1023 e1019.

RUNNING HEAD: THALAMUS LINKS PATERNAL AGE AND OFFSPRING'S READING

- 1024 64. Jayasekara, R., & Street, J. (1978). Parental age and parity in dyslexic boys.  
1025 *Journal of biosocial science*, 10(03), 255-261.
- 1026 65. Jin, Z. B., Li, Z., Liu, Z., Jiang, Y., Cai, X. B., & Wu, J. (2017). Identification of  
1027 de novo germline mutations and causal genes for sporadic diseases using trio-  
1028 based whole-exome/genome sequencing. *Biological Reviews*.
- 1029 66. Joo, S. J., Donnelly, P. M., & Yeatman, J. D. (2017). The causal relationship  
1030 between dyslexia and motion perception reconsidered. *Scientific Reports*, 7(1),  
1031 4185.
- 1032 67. Khandwala, Y. S., Zhang, C. A., Lu, Y., & Eisenberg, M. L. (2017). The age of  
1033 fathers in the USA is rising: an analysis of 168 867 480 births from 1972 to  
1034 2015. *Human Reproduction*, 1-7.
- 1035 68. Kim, D. S., Burt, A. A., Ranchalis, J. E., Wilmot, B., Smith, J. D., Patterson, K.  
1036 E., . . . Mendelian, U. W. C. (2017). Sequencing of Sporadic Attention-Deficit  
1037 Hyperactivity Disorder (ADHD) Identifies Novel and Potentially Pathogenic  
1038 De Novo Variants and Excludes Overlap with Genes Associated With Autism  
1039 Spectrum Disorder. *American Journal of Medical Genetics Part B-  
1040 Neuropsychiatric Genetics*, 174(4), 381-389.
- 1041 69. Kong, A., Frigge, M. L., Masson, G., Besenbacher, S., Sulem, P., Magnusson, G.,  
1042 . . . Stefansson, K. (2012). Rate of de novo mutations and the importance of  
1043 father's age to disease risk. *Nature*, 488(7412), 471-475.

RUNNING HEAD: THALAMUS LINKS PATERNAL AGE AND OFFSPRING'S READING

- 1044 70. Krauth, A., Blanc, R., Poveda, A., Jeanmonod, D., Morel, A., & Szekely, G.  
1045 (2010). A mean three-dimensional atlas of the human thalamus: generation  
1046 from multiple histological data. *Neuroimage*, 49(3), 2053-2062.
- 1047 71. Lebel, C., Shaywitz, B., Holahan, J., Shaywitz, S., Marchione, K., & Beaulieu, C.  
1048 (2013). Diffusion tensor imaging correlates of reading ability in dysfluent and  
1049 non-impaired readers. *Brain and Language*, 125(2), 215-222.
- 1050 72. Leemans, A., Jeurissen, B., Sijbers, J., & Jones, D. (2009). *ExploreDTI: a*  
1051 *graphical toolbox for processing, analyzing, and visualizing diffusion MR*  
1052 *data*. Paper presented at the 17th Annual Meeting of Intl Soc Mag Reson  
1053 Med.
- 1054 73. Leemans, A., & Jones, D. K. (2009). The B-matrix must be rotated when  
1055 correcting for subject motion in DTI data. *Magnetic Resonance in Medicine*,  
1056 61(6), 1336-1349.
- 1057 74. Lefly, D. L., & Pennington, B. F. (2000). Reliability and validity of the adult  
1058 reading history questionnaire. *J Learn Disabil*, 33(3), 286-296.
- 1059 75. Maisog, J. M., Einbinder, E. R., Flowers, D. L., Turkeltaub, P. E., & Eden, G. F.  
1060 (2008). A meta-analysis of functional neuroimaging studies of dyslexia. *Ann*  
1061 *N Y Acad Sci*, 1145, 237-259.
- 1062 76. Malaspina, D., Gilman, C., & Kranz, T. M. (2015). Paternal age and mental  
1063 health of offspring. *Fertil Steril*, 103(6), 1392-1396.

RUNNING HEAD: THALAMUS LINKS PATERNAL AGE AND OFFSPRING'S READING

- 1064 77. Malaspina, D., Harlap, S., Fennig, S., Heiman, D., Nahon, D., Feldman, D., &  
1065 Susser, E. S. (2001). Advancing paternal age and the risk of schizophrenia.  
1066 *Archives of General Psychiatry, 58*(4), 361-367.
- 1067 78. Mascheretti, S., Bureau, A., Battaglia, M., Simone, D., Quadrelli, E., Croteau, J.,  
1068 . . . Marino, C. (2013). An assessment of gene-by-environment interactions in  
1069 developmental dyslexia-related phenotypes. *Genes Brain and Behavior, 12*(1),  
1070 47-55.
- 1071 79. Mascheretti, S., De Luca, A., Trezzi, V., Peruzzo, D., Nordio, A., Marino, C., &  
1072 Arrigoni, F. (2017). Neurogenetics of developmental dyslexia: from genes to  
1073 behavior through brain neuroimaging and cognitive and sensorial  
1074 mechanisms. *Transl Psychiatry, 7*, e987.
- 1075 80. Mascheretti, S., Riva, V., Giorda, R., Beri, S., Lanzoni, L. F. E., Cellino, M. R., &  
1076 Marino, C. (2014). KIAA0319 and ROBO1: evidence on association with  
1077 reading and pleiotropic effects on language and mathematics abilities in  
1078 developmental dyslexia. *Journal Of Human Genetics, 59*, 189.
- 1079 81. Mather, M. (1998). Woodcock Reading Mastery Tests—Revised/Normative  
1080 Update. *Circle Pines, MN: American Guidance Service*.
- 1081 82. Matthews, A. J., & Martin, F. H. (2015). Spatial attention and reading ability:  
1082 ERP correlates of flanker and cue-size effects in good and poor adult  
1083 phonological decoders. *Brain and Language, 151*, 1-11.
- 1084 83. McGrew, K. S., & Schrank, F. A. (2007). Technical manual. Woodcock-Johnson  
1085 III normative update. *Rolling Meadows, IL: Riverside Publishing*.

RUNNING HEAD: THALAMUS LINKS PATERNAL AGE AND OFFSPRING'S READING

- 1086 84. Mirman, D., Chen, Q., Zhang, Y., Wang, Z., Faseyitan, O. K., Coslett, H. B., &  
1087 Schwartz, M. F. (2015). Neural organization of spoken language revealed by  
1088 lesion–symptom mapping. *Nature Communications*, *6*, 6762.
- 1089 85. Myers, C. A., Vandermosten, M., Farris, E. A., Hancock, R., Gimenez, P., Black,  
1090 J. M., . . . Hoeft, F. (2014). White matter morphometric changes uniquely  
1091 predict children's reading acquisition. *Psychol Sci*, *25*(10), 1870-1883.
- 1092 86. Noble, K. G., Wolmetz, M. E., Ochs, L. G., Farah, M. J., & McCandliss, B. D.  
1093 (2006). Brain–behavior relationships in reading acquisition are modulated by  
1094 socioeconomic factors. *Dev Sci*, *9*(6), 642-654.
- 1095 87. O'Roak, B. J., Deriziotis, P., Lee, C., Vives, L., Schwartz, J. J., Girirajan, S., . . .  
1096 Eichler, E. E. (2011). Exome sequencing in sporadic autism spectrum  
1097 disorders identifies severe de novo mutations. *Nature Genetics*, *43*, 585.
- 1098 88. O'Roak, B. J., Vives, L., Fu, W., Egertson, J. D., Stanaway, I. B., Phelps, I. G., . . .  
1099 . Shendure, J. (2012). Multiplex Targeted Sequencing Identifies Recurrently  
1100 Mutated Genes in Autism Spectrum Disorders. *Science*, *338*(6114), 1619-  
1101 1622.
- 1102 89. Olulade, O. A., Napoliello, E. M., & Eden, G. F. (2013). Abnormal visual motion  
1103 processing is not a cause of dyslexia. *Neuron*, *79*(1), 180-190.
- 1104 90. Pan, J., Kong, Y., Song, S., McBride, C., Liu, H., & Shu, H. (2016).  
1105 Socioeconomic status, parent report of children's early language skills, and  
1106 late literacy skills: a long term follow-up study among Chinese children.  
1107 *Reading and Writing*, 1-16.

RUNNING HEAD: THALAMUS LINKS PATERNAL AGE AND OFFSPRING'S READING

- 1108 91. Pennington, B. F. (2006). From single to multiple deficit models of  
1109 developmental disorders. *Cognition*, *101*(2), 385-413.
- 1110 92. Perrin, M. C., Brown, A. S., & Malaspina, D. (2007). Aberrant Epigenetic  
1111 Regulation Could Explain the Relationship of Paternal Age to Schizophrenia.  
1112 *Schizophr Bull*, *33*(6), 1270-1273.
- 1113 93. Peterson, R. L., & Pennington, B. F. (2012). Developmental dyslexia. *Lancet*,  
1114 *379*(9830), 1997-2007.
- 1115 94. Petrill, S. A., Deater-Deckard, K., Thompson, L. A., DeThorne, L. S., &  
1116 Schatschneider, C. (2006). Genetic and environmental effects of serial  
1117 naming and phonological awareness on early reading outcomes. *Journal of*  
1118 *Educational Psychology*, *98*(1), 112-121.
- 1119 95. Pierpaoli, C., & Basser, P. J. (1996). Toward a quantitative assessment of  
1120 diffusion anisotropy. *Magnetic Resonance in Medicine*, *36*(6), 893-906.
- 1121 96. Poelmans, G., Buitelaar, J. K., Pauls, D. L., & Franke, B. (2011). A theoretical  
1122 molecular network for dyslexia: integrating available genetic findings. *Mol*  
1123 *Psychiatry*, *16*(4), 365-382.
- 1124 97. Preston, J. L., Frost, S. J., Mencl, W. E., Fulbright, R. K., Landi, N., Grigorenko,  
1125 E., . . . Pugh, K. R. (2010). Early and late talkers: school-age language,  
1126 literacy and neurolinguistic differences. *Brain*, *133*, 2185-2195.
- 1127 98. Price, J. (2008). Parent-Child Quality Time Does Birth Order Matter? *Journal of*  
1128 *Human Resources*, *43*(1), 240-265.

RUNNING HEAD: THALAMUS LINKS PATERNAL AGE AND OFFSPRING'S READING

- 1129 Pugh, K. R., Landi, N., Preston, J. L., Mencl, W. E., Austin, A. C., Sibley, D., . . .  
1130 Frost, S. J. (2013). The relationship between phonological and auditory  
1131 processing and brain organization in beginning readers. *Brain and Language*,  
1132 *125*(2), 173-183.
- 1133 99. Purushothaman, G., Marion, R., Li, K., & Casagrande, V. A. (2012). Gating and  
1134 control of primary visual cortex by pulvinar. *Nat Neurosci*, *15*(6), 905-912.
- 1135 100. Raznahan, A., Shaw, P. W., Lerch, J. P., Clasen, L. S., Greenstein, D., Berman,  
1136 R., . . . Giedd, J. N. (2014). Longitudinal four-dimensional mapping of  
1137 subcortical anatomy in human development. *Proc Natl Acad Sci U S A*,  
1138 *111*(4), 1592-1597.
- 1139 101. Reichenberg, A., Gross, R., Weiser, M., Bresnahan, M., Silverman, J., Harlap,  
1140 S., . . . Susser, E. (2006). Advancing paternal age and autism. *Arch Gen*  
1141 *Psychiatry*, *63*(9), 1026-1032.
- 1142 102. Reijnders, M. R., Zachariadis, V., Latour, B., Jolly, L., Mancini, G. M., Pfundt,  
1143 R., . . . Kleefstra, T. (2016). De Novo Loss-of-Function Mutations in USP9X  
1144 Cause a Female-Specific Recognizable Syndrome with Developmental Delay  
1145 and Congenital Malformations. *Am J Hum Genet*.
- 1146 103. Ridgway, G., Camara, O., Scahill, R., Crum, W., Whitcer, B., Fox, N., & Hill,  
1147 D. (2007). Longitudinal Voxel-based morphometry with unified segmentation:  
1148 evaluation on simulated Alzheimer's disease.

RUNNING HEAD: THALAMUS LINKS PATERNAL AGE AND OFFSPRING'S READING

- 1149 104. Roach, N. W., & Hogben, J. H. (2004). Attentional Modulation of Visual  
1150 Processing in Adult Dyslexia: A Spatial-Cuing Deficit. *Psychol Sci*, *15*(10),  
1151 650-654.
- 1152 105. Ruffino, M., Gori, S., Boccardi, D., Molteni, M., & Facoetti, A. (2014). Spatial  
1153 and temporal attention in developmental dyslexia. *Front Hum Neurosci*, *8*,  
1154 331.
- 1155 106. Saha, S., Barnett, A. G., Foldi, C., Burne, T. H., Eyles, D. W., Buka, S. L., &  
1156 McGrath, J. J. (2009). Advanced paternal age is associated with impaired  
1157 neurocognitive outcomes during infancy and childhood. *PLoS Med*, *6*(3),  
1158 e1000040.
- 1159 107. Sanders, S. J., Xin, H., Willsey, A. J., Ercan-Sencicek, A. G., Samocha, K. E.,  
1160 Cicek, A. E., . . . Consortium, A. S. (2015). Insights into Autism Spectrum  
1161 Disorder Genomic Architecture and Biology from 71 Risk Loci. *Neuron*, *87*(6),  
1162 1215-1233.
- 1163 108. Sartorius, G. A., & Nieschlag, E. (2010). Paternal age and reproduction. *Hum*  
1164 *Reprod Update*, *16*(1), 65-79.
- 1165 109. Sebat, J., Lakshmi, B., Malhotra, D., Troge, J., Lese-Martin, C., Walsh, T., . . .  
1166 Wigler, M. (2007). Strong association of de novo copy number mutations with  
1167 autism. *Science*, *316*(5823), 445-449.
- 1168 110. Segers, E., Damhuis, C. M., van de Sande, E., & Verhoeven, L. (2016). Role of  
1169 executive functioning and home environment in early reading development.  
1170 *Learning and Individual Differences*, *49*, 251-259.



RUNNING HEAD: THALAMUS LINKS PATERNAL AGE AND OFFSPRING'S READING

- 1171 111. Shaw, L. A. (2010). *The relationship between the Wechsler Intelligence Scale for*  
1172 *Children-and the Woodcock-Johnson III Tests of Cognitive Abilities in a*  
1173 *clinically referred pediatric population*: Nova Southeastern University.
- 1174 112. Shaw, P., Gilliam, M., Malek, M., Rodriguez, N., Greenstein, D., Clasen, L., . . .  
1175 Giedd, J. (2012). Parental age effects on cortical morphology in offspring.  
1176 *Cereb Cortex*, 22(6), 1256-1262.
- 1177 113. Shaywitz, S. E., & Shaywitz, B. A. (2008). Paying attention to reading: the  
1178 neurobiology of reading and dyslexia. *Dev Psychopathol*, 20(4), 1329-1349.
- 1179 114. Shimono, M., Mano, H., & Niki, K. (2012). The brain structural hub of  
1180 interhemispheric information integration for visual motion perception. *Cereb*  
1181 *Cortex*, 22(2), 337-344.
- 1182 115. Shipp, S. (2004). The brain circuitry of attention. *Trends Cogn Sci*, 8(5), 223-  
1183 230.
- 1184 116. Singh, T., Kurki, M. I., Curtis, D., Purcell, S. M., Crooks, L., McRae, J., . . .  
1185 Barrett, J. C. (2016). Rare loss-of-function variants in SETD1A are associated  
1186 with schizophrenia and developmental disorders. *Nat Neurosci*.
- 1187 117. Skeide, M. A., Kumar, U., Mishra, R. K., Tripathi, V. N., Guleria, A., Singh, J.  
1188 P., . . . Huettig, F. (2017). Learning to read alters cortico-subcortical cross-  
1189 talk in the visual system of illiterates. *Sci Adv*, 3(5), e1602612.
- 1190 118. Spencer, M. D., Holt, R. J., Chura, L. R., Calder, A. J., Suckling, J., Bullmore,  
1191 E. T., & Baron-Cohen, S. (2012). Atypical activation during the Embedded

RUNNING HEAD: THALAMUS LINKS PATERNAL AGE AND OFFSPRING'S READING

- 1192            Figures Task as a functional magnetic resonance imaging endophenotype of  
1193            autism. *Brain*, *135*, 3469-3480.
- 1194 119. Stevens, C., & Bavelier, D. (2012). The role of selective attention on academic  
1195            foundations: a cognitive neuroscience perspective. *Dev Cogn Neurosci*, *2*  
1196            *Suppl 1*, S30-48.
- 1197 120. Sussman, D., Leung, R. C., Chakravarty, M. M., Lerch, J. P., & Taylor, M. J.  
1198            (2016). Developing human brain: age-related changes in cortical, subcortical,  
1199            and cerebellar anatomy. *Brain and Behavior*.
- 1200 121. Swagerman, S. C., van Bergen, E., Dolan, C., de Geus, E. J. C., Koenis, M. M.  
1201            G., Hulshoff Pol, H. E., & Boomsma, D. I. (2017). Genetic transmission of  
1202            reading ability. *Brain and Language*, *172*, 3-8.
- 1203 122. Thompson, P. A., Hulme, C., Nash, H. M., Gooch, D., Hayiou-Thomas, E., &  
1204            Snowling, M. J. (2015). Developmental dyslexia: predicting individual risk. *J*  
1205            *Child Psychol Psychiatry*, *56*(9), 976-987.
- 1206 123. Torgesen, J. K., Wagner, R., & Rashotte, C. (1999). TOWRE–2 Test of Word  
1207            Reading Efficiency. *Austin, TX: Pro-Ed*.
- 1208 124. Turner, T. N., Coe, B. P., Dickel, D. E., Hoekzema, K., Nelson, B. J., Zody, M.  
1209            C., . . . Eichler, E. E. (2017). Genomic Patterns of De Novo Mutation in  
1210            Simplex Autism. *Cell*.
- 1211 125. van Bergen, E., Bishop, D., van Zuijen, T., & de Jong, P. F. (2015). How does  
1212            parental reading influence children's reading? A study of cognitive mediation.  
1213            *Scientific Studies of Reading*, *19*(5), 325-339.

RUNNING HEAD: THALAMUS LINKS PATERNAL AGE AND OFFSPRING'S READING

- 1214 126. van Bergen, E., van der Leij, A., & de Jong, P. F. (2014). The intergenerational  
1215 multiple deficit model and the case of dyslexia. *Front Hum Neurosci*, 8(346),  
1216 1-13.
- 1217 127. Vandermosten, M., Cuyenen, L., Vanderauwera, J., Wouters, J., & Ghesquiere,  
1218 P. (2017). White matter pathways mediate parental effects on children's  
1219 reading precursors. *Brain and Language*, 173, 10-19.
- 1220 128. Veerappa, A. M., Saldanha, M., Padakannaya, P., & Ramachandra, N. B.  
1221 (2013). Family-based genome-wide copy number scan identifies five new  
1222 genes of dyslexia involved in dendritic spinal plasticity. *J Hum Genet*, 58(8),  
1223 539-547.
- 1224 129. Vidyasagar, T. R., & Pammer, K. (2010). Dyslexia: a deficit in visuo-spatial  
1225 attention, not in phonological processing. *Trends Cogn Sci*, 14(2), 57-63.
- 1226 130. Wagner, R. K., Torgesen, J. K., & Rashotte, C. A. (1999). *Comprehensive test of*  
1227 *phonological processing: CTOPP*: Pro-ed.
- 1228 131. Wandell, B. A., & Le, R. K. (2017). Diagnosing the Neural Circuitry of Reading.  
1229 *Neuron*, 96(2), 298-311.
- 1230 132. Weiser, M., Reichenberg, A., Werbeloff, N., Kleinhaus, K., Lubin, G.,  
1231 Shmushkevitch, M., . . . Davidson, M. (2008). Advanced Parental Age at Birth  
1232 Is Associated With Poorer Social Functioning in Adolescent Males: Shedding  
1233 Light on a Core Symptom of Schizophrenia and Autism. *Schizophr Bull*,  
1234 34(6), 1042-1046.

RUNNING HEAD: THALAMUS LINKS PATERNAL AGE AND OFFSPRING'S READING

- 1235 133. Wilfert, A. B., Sulovari, A., Turner, T. N., Coe, B. P., & Eichler, E. E. (2017).  
1236 Recurrent de novo mutations in neurodevelopmental disorders: properties  
1237 and clinical implications. *Genome Med*, 9(1), 101.
- 1238 134. Wolf, M., & Denkla, M. (2005). Rapid Automatized Naming and Rapid  
1239 Alternating Stimulus Tests. Austin, TX: PROED: Inc.
- 1240 135. Wu, Q., Chang, C. F., Xi, S., Huang, I. W., Liu, Z., Juan, C. H., . . . Fan, J.  
1241 (2015). A critical role of temporoparietal junction in the integration of top-  
1242 down and bottom-up attentional control. *Human Brain Mapping*, 36(11),  
1243 4317-4333.
- 1244 136. Wu, Y., Wang, J., Zhang, Y., Zheng, D., Zhang, J., Rong, M., . . . Jiang, T.  
1245 (2016). The Neuroanatomical Basis for Posterior Superior Parietal Lobule  
1246 Control Lateralization of Visuospatial Attention. *Front Neuroanat*, 10, 32.
- 1247 137. Xuan, B., Mackie, M. A., Spagna, A., Wu, T., Tian, Y., Hof, P. R., & Fan, J.  
1248 (2016). The activation of interactive attentional networks. *Neuroimage*, 129,  
1249 308-319.
- 1250 138. Yamagata, B., Murayama, K., Black, J. M., Hancock, R., Mimura, M., Yang, T.  
1251 T., . . . Hoefft, F. (2016). Female-Specific Intergenerational Transmission  
1252 Patterns of the Human Corticolimbic Circuitry. *J Neurosci*, 36(4), 1254-1260.
- 1253 139. Yang, D. Y., Rosenblau, G., Keifer, C., & Pelphrey, K. A. (2015). An integrative  
1254 neural model of social perception, action observation, and theory of mind.  
1255 *Neurosci Biobehav Rev*, 51, 263-275.

RUNNING HEAD: THALAMUS LINKS PATERNAL AGE AND OFFSPRING'S READING

- 1256 140. Yarkoni, T., Poldrack, R. A., Nichols, T. E., Van Essen, D. C., & Wager, T. D.  
1257 (2011). Large-scale automated synthesis of human functional neuroimaging  
1258 data. *Nature methods*, 8(8), 665-670.
- 1259 141. Yeo, B. T., Krienen, F. M., Sepulcre, J., Sabuncu, M. R., Lashkari, D.,  
1260 Hollinshead, M., . . . Polimeni, J. R. (2011). The organization of the human  
1261 cerebral cortex estimated by intrinsic functional connectivity. *Journal of*  
1262 *Neurophysiology*, 106(3), 1125-1165.
- 1263 142. Yuan, Y., & Brown, S. (2015). Drawing and writing: An ALE meta-analysis of  
1264 sensorimotor activations. *Brain Cogn*, 98, 15-26.

1265

1266 **Acknowledgments**

1267 The authors would like to thank all the children and their parents for their  
1268 participating in this longitudinal study. They also want to thank Al Galaburda,  
1269 Tuong-Vi Nguyen and other researchers for their thoughtful suggestions during  
1270 manuscript preparation. This study was supported by the Eunice Kennedy Shriver  
1271 National Institute of Child Health and Human Development (NICHD)  
1272 K23HD054720 (PI: F. Hoeft), Child Health Research Program (aka Lucile Packard  
1273 Foundation for Children's Health, Spectrum Child Health & Clinical and  
1274 Translational Science Award) (PI: F. Hoeft). Hoeft was supported by R01HD078351  
1275 (PI: F. Hoeft), R01HD086168 (PIs: F. Hoeft & K. Pugh), R01HD044073 (PI: L.  
1276 Cutting), R01HD067254 (PI: L. Cutting), R01HD065794 (PI: K. Pugh),  
1277 P01HD001994 (PI: J. Rueckl), P50HD52120 (PI: R. Wagner), National Science

RUNNING HEAD: THALAMUS LINKS PATERNAL AGE AND OFFSPRING'S READING

1278 Foundation (NSF) NSF1540854 SL-CN (PI: A. Gazzaley), UCSF Dyslexia Center,  
1279 UCSF Academic Senate Award for Junior Investigators (PI: F. Hoeft), Oak  
1280 Foundation ORIO-16-012 (F. Hoeft, S. Haft, C. Myers), Multicampus Research  
1281 Programs and Initiatives Award (MRP-17-454925), Lori and Ray DePole, Dyslexia  
1282 Training Institute, the Potter Family and ALTA (Academic Language Therapy  
1283 Association).

1284 **Author Contributions**

1285 F. Hoeft designed the study and collected data with her students. F. Hoeft, Z.C. Xia  
1286 and C. Wang conceived the particular idea of the manuscript. Z.C. Xia, C. Wang and  
1287 M. Vandermosten analyzed the data. Z.C. Xia, F. Hoeft, C. Wang, R. Hancock, and  
1288 M. Vandermosten cowrote the manuscript.

1289 **Data Availability**

1290 Data that support the findings of this study are available from the corresponding  
1291 author on request.

1292 **Conflict of interest**

1293 The authors declare no competing financial interests.

1294

1295

## 1296 **Figure Legends**

1297 **Figure 1.** Distribution of paternal age at childbirth (PatAGE) and its relationship  
1298 with reading. **A.** A frequency plot displaying the distribution of PatAGE in the  
1299 current study. **B.** A scatter plot showing the correlation between PatAGE and  
1300 offspring's reading composite scores. Reading scores were calculated by using factor  
1301 analysis on a battery of reading-related tests (see '*behavioral data analyses*' in main  
1302 text for details), and adjusted for demographic variables (age, gender, handedness  
1303 and performance intelligence quotient) at time-point 2 (grade 3). The linear  
1304 regression line and  $R^2$  are shown in the plot.

1305 **Figure 2. A.** Brain regions that are associated with paternal age at childbirth  
1306 (PatAGE) and composite score of reading at time-point 2 ( $t2$ READ). Significant  
1307 clusters were identified from: (1) whole brain voxel-wised regression analyses  
1308 between gray matter volume change ( $\Delta$ GMV) and PatAGE regressing out total  
1309 intracranial volume (TIV) at time-point 1 ( $t1$ ; kindergarten) and change of TIV  
1310 ( $\Delta$ TIV) between time-point 1 and 2 ( $t2$ ; grade 3) (yellow), and (2) between  $\Delta$ GMV and  
1311  $t2$ READ within the PatAGE related cluster (cyan). Threshold:  $p$ -voxel < 0.005  
1312 (height), topological family wise error correction of  $p$ -cluster < 0.05. **B.** A scatter plot  
1313 representing the relationship between yellow cluster in A and PatAGE. The mean  
1314 average of values calculated by subtracting  $t2$  to  $t1$  GMV images from all voxels of  
1315 the yellow cluster are plotted against PatAGE.  $\Delta$ GMV is residualized for  $t1$ TIV and  
1316  $\Delta$ TIV. The linear regression line is displayed in the plot. **C.** A scatter plot

RUNNING HEAD: THALAMUS LINKS PATERNAL AGE AND OFFSPRING'S READING

1317 representing the relationship between cyan cluster in A and reading. The mean  
1318 average of values calculated by subtracting  $t2$  to  $t1$  GMV images from all voxels of  
1319 the yellow cluster are plotted against  $t2$ READ are plotted.  $\Delta$ GMV is residualized for  
1320  $t1$  TIV and  $\Delta$ TIV. The linear regression line is displayed in the plot.

1321 **Figure 3.** Relationship between paternal age at childbirth (PatAGE) and offspring's  
1322 reading at time-point 2 ( $t2$ READ).  $t2$ READ can be significantly predicted by  
1323 PatAGE, and such effect is mediated by gray matter volume change in offspring's  
1324 left thalamus from time-point 1 ( $t1$ ; kindergarten) to time-point 2 ( $t2$ ; grade 3). Age  
1325 at  $t2$ , gender, handedness, average of  $t1$  and  $t2$  performance IQ, total intracranial  
1326 volume (TIV) at  $t1$ , TIV change from  $t1$  to  $t2$ , phonological composite score at  $t1$ ,  
1327 rapid naming composite score at  $t1$  were controlled in the model. The bias corrected  
1328 confidence intervals (95%) for indirect effect didn't contain zero (low = -0.552, high =  
1329 -0.043), indicating the mediation is significant. Supplementary Figure 1 includes  
1330 complementary mediation analysis showing how family history, which typically  
1331 represents heritable risk, predicts reading outcome via phonological processing.

1332 **Figure 4.** Localization and structural connectivity pattern of the posterior thalamic  
1333 region based on Morel and Thalamic Connectivity atlases. **A.** A bar plot displaying  
1334 the percentage of total voxels in the paternal age-related cluster (yellow cluster in  
1335 Figure 2A) overlaps with different divisions of the Morel atlas (Jakab et al., 2012;  
1336 Krauth et al., 2010). **B.** A bar plot showing the probability of the cluster belonging  
1337 to different subdivisions of the Thalamic connectivity atlas. The probability is  
1338 calculated by using 'autoaq' function implemented in FSL



RUNNING HEAD: THALAMUS LINKS PATERNAL AGE AND OFFSPRING'S READING

1339 (<https://fsl.fmrib.ox.ac.uk/fsl/fslwiki/Atlases>). *Acronyms: CL, central lateral nucleus;*  
1340 *CM, central median nucleus; LP, lateral posterior nucleus; VLpv, ventral lateral*  
1341 *posterior nucleus, ventral; VPI, ventral posterior inferior nucleus; VPL, ventral*  
1342 *posterior lateral nucleus; VPM, ventral posterior medial nucleus.*

1343 **Figure 5.** Functional co-activation and connectivity patterns of the posterior  
1344 thalamic region based on Neurosynth. **A.** A brain map representing overlapping  
1345 regions between co-activation and resting-state functional connectivity (RSFC)  
1346 maps where these maps were generated in Neurosynth with the seed being the  
1347 center-of-gravity of the paternal age-related cluster (yellow cluster in Figure 2A). **B.**  
1348 A bar plot showing the degree of overlap between the overlap map in **A** and the 7  
1349 functional networks derived from Yeo (2011) represented by Dice coefficients. Dice  
1350 coefficient measures the similarity between the overlapping areas and a given  
1351 function network, ranging from 0 to 1. While 0 indicates the two networks are  
1352 disjoint, 1 indicates the two networks are identical. *Acronyms: LH, left hemisphere;*  
1353 *RH, right hemisphere.*

1354 **Figure 6.** Structural connectivity patterns (white matter tractography) of the  
1355 posterior thalamic region using subject-specific diffusion imaging data. **A.** An  
1356 example of reconstructed fibers in a representative child with the seed being the  
1357 paternal age (PatAGE)-related cluster (APA-cluster; yellow cluster in Figure 2A). **B.**  
1358 Intersection across children with diffusion imaging data (N = 23) is shown for  
1359 demonstrative purposes. In particular, only fibers (i.e., streamlines) observed in  
1360 more than 25% of the subjects (i.e., 6 children) are displayed. The color bar

RUNNING HEAD: THALAMUS LINKS PATERNAL AGE AND OFFSPRING'S READING

1361 represents the number of subjects where the streamline is observed in a given voxel.  
1362 **C.** The dorsal attention network (DAN) compared to the ventral attention network  
1363 (VAN) derived from Yeo et al (2011) showed significantly greater number of  
1364 streamlines (an index of structural connectivity) to go through the APA-cluster.  
1365 DAN- and VAN-related connectivity in each subject was defined as the number of  
1366 streamlines that pass through the APA-cluster and the given network. Then the  
1367 number was normalized by dividing the total number of streamlines by the size  
1368 (volume) of the target network. **D.** A scatter plot shows a positive correlation  
1369 between PatAGE and number of streamlines labeled as DAN passing through the  
1370 APA cluster. The linear regression line and  $R^2$  are shown. **E.** A scatter plot shows a  
1371 negative correlation between reading composite scores at time-point 2 (grade 3) and  
1372 the number of streamlines passing through the APA-cluster and DAN. The linear  
1373 regression line and  $R^2$  are shown. *Acronyms: LH, left hemisphere; RH, right*  
1374 *hemisphere.*

1375 **Figure 7.** A schematic diagram summarizing our current findings. Descriptions in  
1376 brackets are potential mechanisms based on the past literature (see main text).  
1377 Descriptions in gray font in a dotted square indicate findings from the past  
1378 literature – studies have shown a greater role for genetic influences on parent-  
1379 offspring correlations in the dorsal phonological pathway and processing, and more  
1380 environmental influence on the ventral orthographic pathway and processing (Olson  
1381 et al. 1989, Samuelsson et al. 2007).

1382

RUNNING HEAD: THALAMUS LINKS PATERNAL AGE AND OFFSPRING'S READING

1383 **Tables**

1384  
 1385 Table 1 Multiple linear regression analyses examining the unique contribution of  
 1386 paternal age on offspring's reading performance at time-point 2

| Model   | Step | Predictor         | $\Delta R^2$ | $\beta$  |        |
|---------|------|-------------------|--------------|----------|--------|
| 1       | 1    | Age ( <i>t</i> 2) | 0.284 *      | -0.351 * |        |
|         |      | Gender            |              | -0.022   |        |
|         |      | Handedness        |              | 0.081    |        |
|         |      | Average pIQ       |              | 0.302 *  |        |
| 2       | 1    | Age ( <i>t</i> 2) | 0.279 *      | -0.296   |        |
|         |      | Gender            |              | 0.026    |        |
|         | 2    | Handedness        |              | 0.093    |        |
|         |      | Average pIQ       |              | 0.200    |        |
|         |      | Birth Order       | 0.237 †      | -0.178   |        |
|         |      | MatAGE            |              | 0.245    |        |
|         |      | PatARHQ           |              | -0.100   |        |
|         |      | MatARHQ           |              | -0.200   |        |
|         | 3    | 3                 | SES          |          | -0.189 |
|         |      |                   | HOME         |          | 0.224  |
| PatAGE  |      |                   | 0.095 *      | -0.522 * |        |
| PatAGE  |      |                   | 0.279 *      | -0.247   |        |
| 3       | 1    | Gender            |              | -0.012   |        |
|         |      | Handedness        |              | 0.106    |        |
|         |      | Average pIQ       |              | -0.020   |        |
|         |      | 2                 | Birth Order  | 0.237 †  | -0.033 |
|         |      |                   | MatAGE       |          | 0.113  |
| PatARHQ |      |                   | -0.088       |          |        |
| 3       | 2    | MatARHQ           |              | -0.122   |        |

RUNNING HEAD: THALAMUS LINKS PATERNAL AGE AND OFFSPRING'S READING

---

|  |   |               |         |          |
|--|---|---------------|---------|----------|
|  |   | SES           |         | -0.135   |
|  |   | HOME          |         | 0.209    |
|  | 3 | <i>t</i> 1PA  | 0.138 * | 0.403 ** |
|  |   | <i>t</i> 1RAN |         | 0.307 *  |
|  | 4 | PatAGE        | 0.073*  | -0.469 * |

---

Note:

$\beta$ 's are values at the final step (all predictors included).

Abbreviations: ARHQ, Adult Reading History Questionnaire; HOME, Home Observation Measurement of the Environment; Mat, maternal; PA, phonological awareness; Pat, paternal; pIQ, performance intelligence quotient; RAN, rapid naming; SES, socioeconomic status; *t*1, time-point 1; *t*2, time-point 2.

\*\*  $p < 0.01$ ; \*  $p < 0.05$ , †  $p < 0.1$

1387

1388

## RUNNING HEAD: THALAMUS LINKS PATERNAL AGE AND OFFSPRING'S READING

### 1389 **Figures**

1390

1391 Figure 1

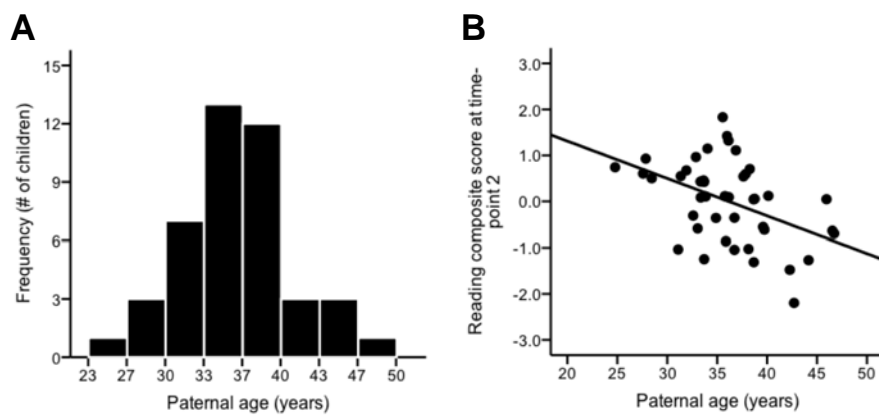

1392

1393

RUNNING HEAD: THALAMUS LINKS PATERNAL AGE AND OFFSPRING'S READING

1394 Figure 2

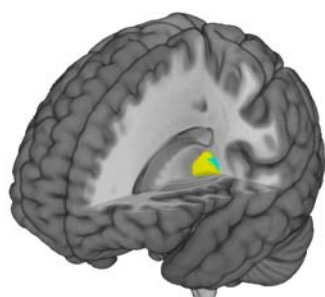

Paternal age Reading

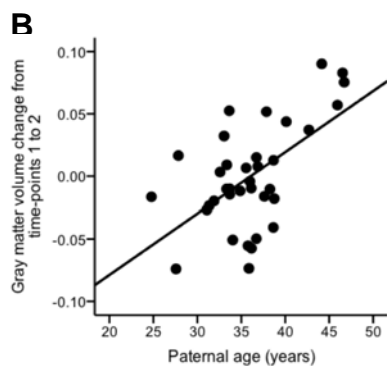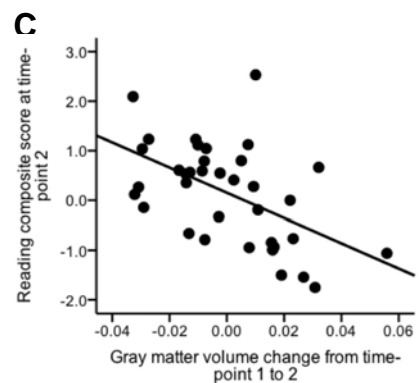

1395

1396

RUNNING HEAD: THALAMUS LINKS PATERNAL AGE AND OFFSPRING'S READING

1397 Figure 3

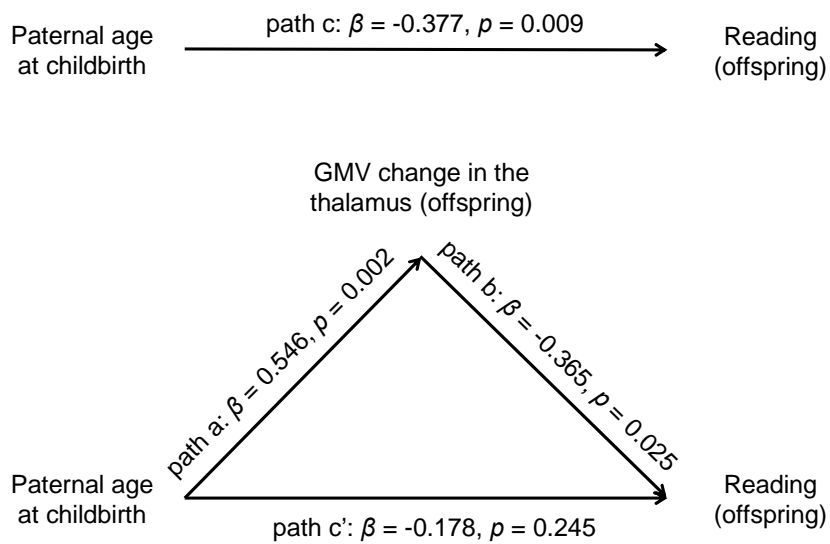

1398

1399

RUNNING HEAD: THALAMUS LINKS PATERNAL AGE AND OFFSPRING'S READING

1400 Figure 4

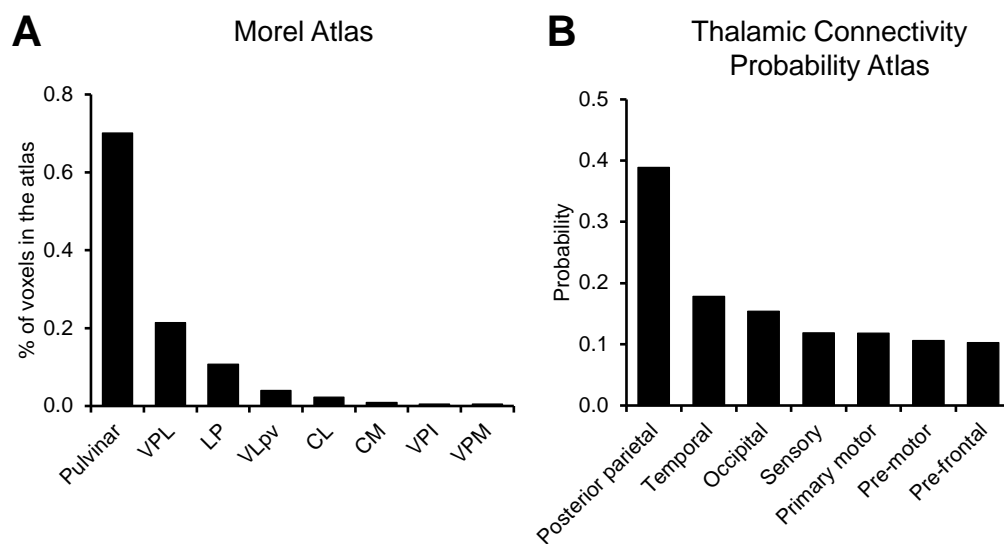

1401

1402



RUNNING HEAD: THALAMUS LINKS PATERNAL AGE AND OFFSPRING'S READING

1403 Figure 5

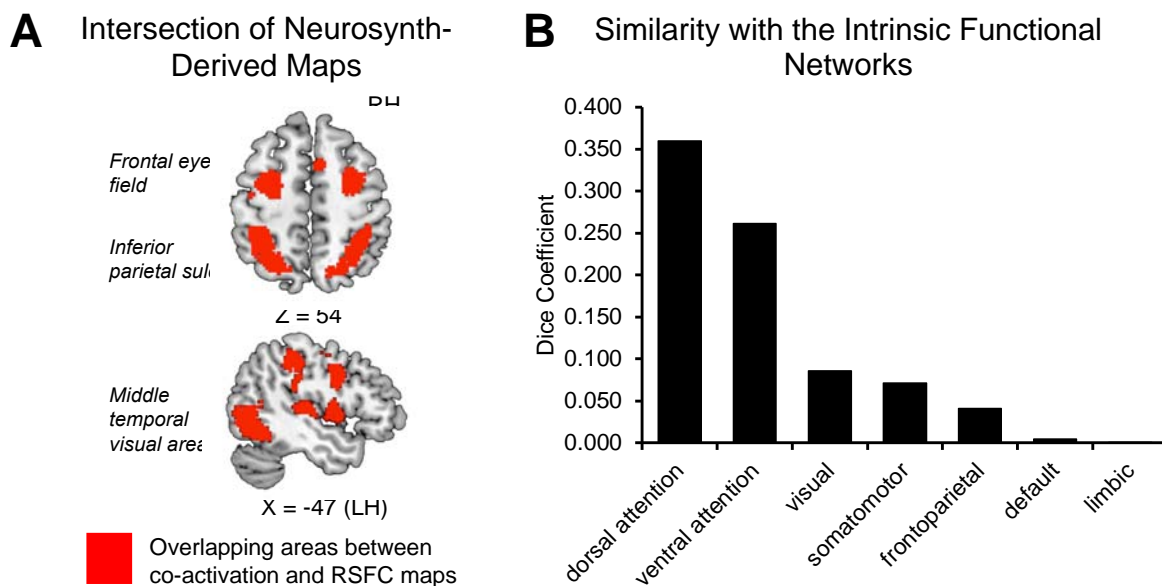

1404

RUNNING HEAD: THALAMUS LINKS PATERNAL AGE AND OFFSPRING'S READING

1405 Figure 6

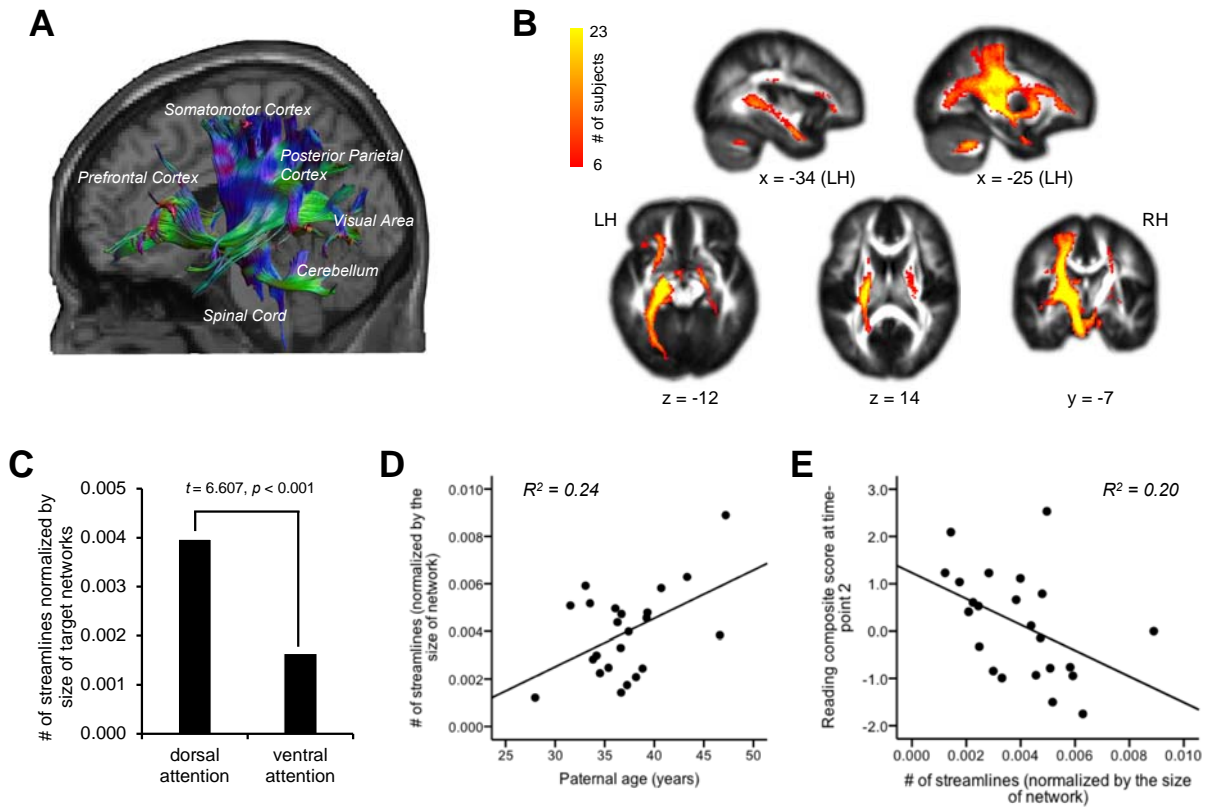

1406

1407

1408 Figure 7

### Multifactorial Liability Potentially Contributing to Poor Reading

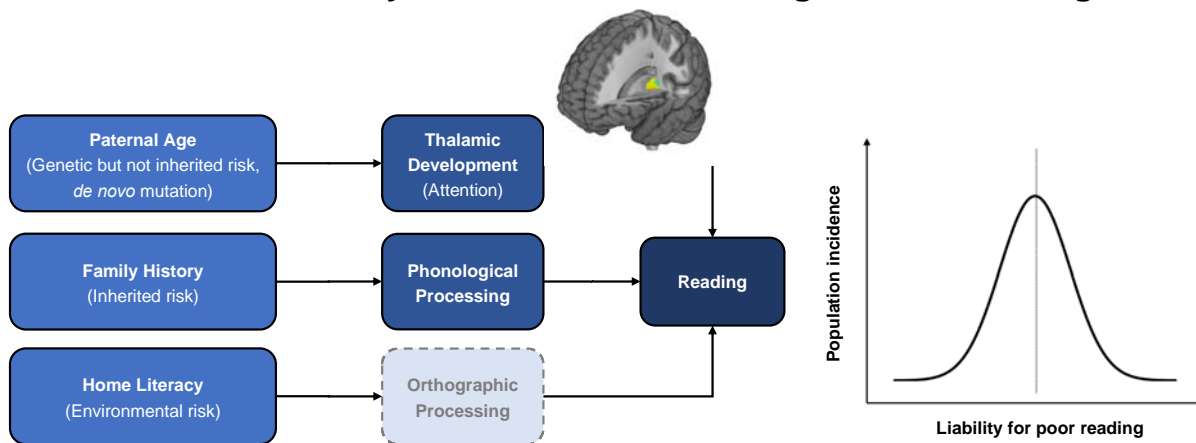

1409
